# Supplementary material for: Checklist of the Ichneumonidae of Germany (Insecta, Hymenoptera)
Source: Biodivers Data J. 2021 May 26;9:e64267. doi: 10.3897/BDJ.9.e64267 (PMC8172520; doi:10.3897/BDJ.9.e64267)
Supplement: Supplementary material 1 — Checklist of German Ichneumonidae [file bdj-09-e64267-s001.xlsx]

## Sheet: Checklist Supplement
Phylum	Class	Order	Family	Subfamily	Tribe	Genus	Species	AuthorYear
Arthropoda	Insecta	Hymenoptera	Ichneumonidae	Acaenitinae	Acaenitini	Acaenitus	Acaenitus dubitator	(Panzer, 1800)
Arthropoda	Insecta	Hymenoptera	Ichneumonidae	Acaenitinae	Acaenitini	Arotes	Arotes albicinctus	Gravenhorst, 1829
Arthropoda	Insecta	Hymenoptera	Ichneumonidae	Acaenitinae	Acaenitini	Phaenolobus	Phaenolobus fraudator	Bauer, 1961
Arthropoda	Insecta	Hymenoptera	Ichneumonidae	Acaenitinae	Acaenitini	Phaenolobus	Phaenolobus fulvicornis	(Gravenhorst, 1829)
Arthropoda	Insecta	Hymenoptera	Ichneumonidae	Acaenitinae	Acaenitini	Phaenolobus	Phaenolobus saltans	(Gravenhorst, 1829)
Arthropoda	Insecta	Hymenoptera	Ichneumonidae	Acaenitinae	Acaenitini	Phaenolobus	Phaenolobus terebrator	(Scopoli, 1763)
Arthropoda	Insecta	Hymenoptera	Ichneumonidae	Acaenitinae	Coleocentrini	Coleocentrus	Coleocentrus caligatus	Gravenhorst, 1829
Arthropoda	Insecta	Hymenoptera	Ichneumonidae	Acaenitinae	Coleocentrini	Coleocentrus	Coleocentrus croceicornis	(Gravenhorst, 1829)
Arthropoda	Insecta	Hymenoptera	Ichneumonidae	Acaenitinae	Coleocentrini	Coleocentrus	Coleocentrus exareolatus	Kriechbaumer, 1894
Arthropoda	Insecta	Hymenoptera	Ichneumonidae	Acaenitinae	Coleocentrini	Coleocentrus	Coleocentrus excitator	(Poda, 1761)
Arthropoda	Insecta	Hymenoptera	Ichneumonidae	Acaenitinae	Coleocentrini	Coleocentrus	Coleocentrus soldanskii	Bischoff, 1915
Arthropoda	Insecta	Hymenoptera	Ichneumonidae	Acaenitinae	Coleocentrini	Leptacoenites	Leptacoenites notabilis	(Desvignes, 1856)
Arthropoda	Insecta	Hymenoptera	Ichneumonidae	Acaenitinae	Coleocentrini	Mesoclistus	Mesoclistus rufipes	(Gravenhorst, 1829)
Arthropoda	Insecta	Hymenoptera	Ichneumonidae	Acaenitinae	Coleocentrini	Procinetus	Procinetus decimator	(Gravenhorst, 1829)
Arthropoda	Insecta	Hymenoptera	Ichneumonidae	Adelognathinae		Adelognathus	Adelognathus acantholydae	Kasparyan, 1986
Arthropoda	Insecta	Hymenoptera	Ichneumonidae	Adelognathinae		Adelognathus	Adelognathus brevicornis	Holmgren, 1857
Arthropoda	Insecta	Hymenoptera	Ichneumonidae	Adelognathinae		Adelognathus	Adelognathus brevis	Kasparyan, 1986
Arthropoda	Insecta	Hymenoptera	Ichneumonidae	Adelognathinae		Adelognathus	Adelognathus britannicus	Perkins, 1943
Arthropoda	Insecta	Hymenoptera	Ichneumonidae	Adelognathinae		Adelognathus	Adelognathus chrysopygus	(Gravenhorst, 1829)
Arthropoda	Insecta	Hymenoptera	Ichneumonidae	Adelognathinae		Adelognathus	Adelognathus ctenonyx	Kasparyan, 1986
Arthropoda	Insecta	Hymenoptera	Ichneumonidae	Adelognathinae		Adelognathus	Adelognathus cubiceps	Roman, 1925
Arthropoda	Insecta	Hymenoptera	Ichneumonidae	Adelognathinae		Adelognathus	Adelognathus difformis	Holmgren, 1857
Arthropoda	Insecta	Hymenoptera	Ichneumonidae	Adelognathinae		Adelognathus	Adelognathus dorsalis	(Gravenhorst, 1829)
Arthropoda	Insecta	Hymenoptera	Ichneumonidae	Adelognathinae		Adelognathus	Adelognathus facialis	Thomson, 1883
Arthropoda	Insecta	Hymenoptera	Ichneumonidae	Adelognathinae		Adelognathus	Adelognathus laevicollis	Thomson, 1883
Arthropoda	Insecta	Hymenoptera	Ichneumonidae	Adelognathinae		Adelognathus	Adelognathus marginellus	Holmgren, 1857
Arthropoda	Insecta	Hymenoptera	Ichneumonidae	Adelognathinae		Adelognathus	Adelognathus nigriceps	Thomson, 1888
Arthropoda	Insecta	Hymenoptera	Ichneumonidae	Adelognathinae		Adelognathus	Adelognathus nigrifrons	Holmgren, 1857
Arthropoda	Insecta	Hymenoptera	Ichneumonidae	Adelognathinae		Adelognathus	Adelognathus obscurus	Kasparyan, 1986
Arthropoda	Insecta	Hymenoptera	Ichneumonidae	Adelognathinae		Adelognathus	Adelognathus pallipes	(Gravenhorst, 1829)
Arthropoda	Insecta	Hymenoptera	Ichneumonidae	Adelognathinae		Adelognathus	Adelognathus puncticollis	Thomson, 1883
Arthropoda	Insecta	Hymenoptera	Ichneumonidae	Adelognathinae		Adelognathus	Adelognathus punctulatus	Thomson, 1883
Arthropoda	Insecta	Hymenoptera	Ichneumonidae	Adelognathinae		Adelognathus	Adelognathus pusillus	Holmgren, 1857
Arthropoda	Insecta	Hymenoptera	Ichneumonidae	Adelognathinae		Adelognathus	Adelognathus rufithorax	Kasparyan, 1990
Arthropoda	Insecta	Hymenoptera	Ichneumonidae	Adelognathinae		Adelognathus	Adelognathus tenthredinarum	(Giraud, 1872)
Arthropoda	Insecta	Hymenoptera	Ichneumonidae	Adelognathinae		Adelognathus	Adelognathus tetratinctorius	(Thunberg, 1824)
Arthropoda	Insecta	Hymenoptera	Ichneumonidae	Adelognathinae		Adelognathus	Adelognathus thomsoni	Schmiedeknecht, 1911
Arthropoda	Insecta	Hymenoptera	Ichneumonidae	Agriotypinae		Agriotypus	Agriotypus armatus	Curtis, 1832
Arthropoda	Insecta	Hymenoptera	Ichneumonidae	Anomaloninae	Anomalonini	Anomalon	Anomalon cruentatum	(Geoffroy, 1785)
Arthropoda	Insecta	Hymenoptera	Ichneumonidae	Anomaloninae	Gravenhorstiini	Agrypon	Agrypon anomelas	(Gravenhorst, 1829)
Arthropoda	Insecta	Hymenoptera	Ichneumonidae	Anomaloninae	Gravenhorstiini	Agrypon	Agrypon anxium	(Wesmael, 1849)
Arthropoda	Insecta	Hymenoptera	Ichneumonidae	Anomaloninae	Gravenhorstiini	Agrypon	Agrypon batis	(Ratzeburg, 1855)
Arthropoda	Insecta	Hymenoptera	Ichneumonidae	Anomaloninae	Gravenhorstiini	Agrypon	Agrypon brachycerum	Hellén, 1950
Arthropoda	Insecta	Hymenoptera	Ichneumonidae	Anomaloninae	Gravenhorstiini	Agrypon	Agrypon canaliculatum	(Ratzeburg, 1844)
Arthropoda	Insecta	Hymenoptera	Ichneumonidae	Anomaloninae	Gravenhorstiini	Agrypon	Agrypon clandestinum	(Gravenhorst, 1829)
Arthropoda	Insecta	Hymenoptera	Ichneumonidae	Anomaloninae	Gravenhorstiini	Agrypon	Agrypon delarvatum	(Gravenhorst, 1829)
Arthropoda	Insecta	Hymenoptera	Ichneumonidae	Anomaloninae	Gravenhorstiini	Agrypon	Agrypon flaveolatum	(Gravenhorst, 1807)
Arthropoda	Insecta	Hymenoptera	Ichneumonidae	Anomaloninae	Gravenhorstiini	Agrypon	Agrypon flexorioides	Schnee, 1989
Arthropoda	Insecta	Hymenoptera	Ichneumonidae	Anomaloninae	Gravenhorstiini	Agrypon	Agrypon flexorium	(Thunberg, 1824)
Arthropoda	Insecta	Hymenoptera	Ichneumonidae	Anomaloninae	Gravenhorstiini	Agrypon	Agrypon gracilipes	(Curtis, 1839)
Arthropoda	Insecta	Hymenoptera	Ichneumonidae	Anomaloninae	Gravenhorstiini	Agrypon	Agrypon hinzi	Schnee, 2018
Arthropoda	Insecta	Hymenoptera	Ichneumonidae	Anomaloninae	Gravenhorstiini	Agrypon	Agrypon interstitiale	Schnee, 1989
Arthropoda	Insecta	Hymenoptera	Ichneumonidae	Anomaloninae	Gravenhorstiini	Agrypon	Agrypon minutum	Bridgman & Fitch, 1884
Arthropoda	Insecta	Hymenoptera	Ichneumonidae	Anomaloninae	Gravenhorstiini	Agrypon	Agrypon opaculum	Heinrich, 1952
Arthropoda	Insecta	Hymenoptera	Ichneumonidae	Anomaloninae	Gravenhorstiini	Agrypon	Agrypon rugifer	(Thomson, 1894)
Arthropoda	Insecta	Hymenoptera	Ichneumonidae	Anomaloninae	Gravenhorstiini	Agrypon	Agrypon varitarsum	(Wesmael, 1849)
Arthropoda	Insecta	Hymenoptera	Ichneumonidae	Anomaloninae	Gravenhorstiini	Aphanistes	Aphanistes wadai	Uchida, 1958
Arthropoda	Insecta	Hymenoptera	Ichneumonidae	Anomaloninae	Gravenhorstiini	Aphanistes	Aphanistes bellicosus	(Wesmael, 1849)
Arthropoda	Insecta	Hymenoptera	Ichneumonidae	Anomaloninae	Gravenhorstiini	Aphanistes	Aphanistes gliscens	(Hartig, 1838)
Arthropoda	Insecta	Hymenoptera	Ichneumonidae	Anomaloninae	Gravenhorstiini	Aphanistes	Aphanistes klugii	(Hartig, 1838)
Arthropoda	Insecta	Hymenoptera	Ichneumonidae	Anomaloninae	Gravenhorstiini	Aphanistes	Aphanistes ruficornis	(Gravenhorst, 1829)
Arthropoda	Insecta	Hymenoptera	Ichneumonidae	Anomaloninae	Gravenhorstiini	Barylypa	Barylypa delictor	(Thunberg, 1824)
Arthropoda	Insecta	Hymenoptera	Ichneumonidae	Anomaloninae	Gravenhorstiini	Barylypa	Barylypa helleni	Schnee, 1989
Arthropoda	Insecta	Hymenoptera	Ichneumonidae	Anomaloninae	Gravenhorstiini	Barylypa	Barylypa mesozona	(Förster, 1878)
Arthropoda	Insecta	Hymenoptera	Ichneumonidae	Anomaloninae	Gravenhorstiini	Barylypa	Barylypa pallida	(Gravenhorst, 1829)
Arthropoda	Insecta	Hymenoptera	Ichneumonidae	Anomaloninae	Gravenhorstiini	Barylypa	Barylypa propugnator	(Förster, 1855)
Arthropoda	Insecta	Hymenoptera	Ichneumonidae	Anomaloninae	Gravenhorstiini	Barylypa	Barylypa rubricator	(Szépligeti, 1899)
Arthropoda	Insecta	Hymenoptera	Ichneumonidae	Anomaloninae	Gravenhorstiini	Barylypa	Barylypa uniguttata	(Gravenhorst, 1829)
Arthropoda	Insecta	Hymenoptera	Ichneumonidae	Anomaloninae	Gravenhorstiini	Erigorgus	Erigorgus alpigenus	Heinrich, 1953
Arthropoda	Insecta	Hymenoptera	Ichneumonidae	Anomaloninae	Gravenhorstiini	Erigorgus	Erigorgus annulitarsis	(Thomson, 1892)
Arthropoda	Insecta	Hymenoptera	Ichneumonidae	Anomaloninae	Gravenhorstiini	Erigorgus	Erigorgus apollinis	Kriechbaumer, 1900
Arthropoda	Insecta	Hymenoptera	Ichneumonidae	Anomaloninae	Gravenhorstiini	Erigorgus	Erigorgus cerinops	(Gravenhorst, 1829)
Arthropoda	Insecta	Hymenoptera	Ichneumonidae	Anomaloninae	Gravenhorstiini	Erigorgus	Erigorgus fibulator	(Gravenhorst, 1829)
Arthropoda	Insecta	Hymenoptera	Ichneumonidae	Anomaloninae	Gravenhorstiini	Erigorgus	Erigorgus latro	(Schrank, 1781)
Arthropoda	Insecta	Hymenoptera	Ichneumonidae	Anomaloninae	Gravenhorstiini	Erigorgus	Erigorgus leucopus	(Szépligeti, 1905)
Arthropoda	Insecta	Hymenoptera	Ichneumonidae	Anomaloninae	Gravenhorstiini	Erigorgus	Erigorgus melanobatus	(Gravenhorst, 1829)
Arthropoda	Insecta	Hymenoptera	Ichneumonidae	Anomaloninae	Gravenhorstiini	Erigorgus	Erigorgus melanops	(Förster, 1855)
Arthropoda	Insecta	Hymenoptera	Ichneumonidae	Anomaloninae	Gravenhorstiini	Erigorgus	Erigorgus procerus	(Gravenhorst, 1829)
Arthropoda	Insecta	Hymenoptera	Ichneumonidae	Anomaloninae	Gravenhorstiini	Erigorgus	Erigorgus varicornis	(Thomson, 1894)
Arthropoda	Insecta	Hymenoptera	Ichneumonidae	Anomaloninae	Gravenhorstiini	Erigorgus	Erigorgus villosus	(Gravenhorst, 1829)
Arthropoda	Insecta	Hymenoptera	Ichneumonidae	Anomaloninae	Gravenhorstiini	Gravenhorstia	Gravenhorstia picta	Boie, 1836
Arthropoda	Insecta	Hymenoptera	Ichneumonidae	Anomaloninae	Gravenhorstiini	Habrocampulum	Habrocampulum biguttatum	(Gravenhorst, 1829)
Arthropoda	Insecta	Hymenoptera	Ichneumonidae	Anomaloninae	Gravenhorstiini	Habronyx	Habronyx heros	(Wesmael, 1849)
Arthropoda	Insecta	Hymenoptera	Ichneumonidae	Anomaloninae	Gravenhorstiini	Habronyx	Habronyx nigricornis	(Wesmael, 1849)
Arthropoda	Insecta	Hymenoptera	Ichneumonidae	Anomaloninae	Gravenhorstiini	Habronyx	Habronyx perspicuus	(Wesmael, 1849)
Arthropoda	Insecta	Hymenoptera	Ichneumonidae	Anomaloninae	Gravenhorstiini	Heteropelma	Heteropelma amictum	(Fabricius, 1775)
Arthropoda	Insecta	Hymenoptera	Ichneumonidae	Anomaloninae	Gravenhorstiini	Heteropelma	Heteropelma grossator	Shestakov, 1923
Arthropoda	Insecta	Hymenoptera	Ichneumonidae	Anomaloninae	Gravenhorstiini	Heteropelma	Heteropelma megarthrum	(Ratzeburg, 1848)
Arthropoda	Insecta	Hymenoptera	Ichneumonidae	Anomaloninae	Gravenhorstiini	Heteropelma	Heteropelma signatum	(Gravenhorst, 1829)
Arthropoda	Insecta	Hymenoptera	Ichneumonidae	Anomaloninae	Gravenhorstiini	Parania	Parania geniculata	(Holmgren, 1857)
Arthropoda	Insecta	Hymenoptera	Ichneumonidae	Anomaloninae	Gravenhorstiini	Perisphincter	Perisphincter brevicollis	(Wesmael, 1849)
Arthropoda	Insecta	Hymenoptera	Ichneumonidae	Anomaloninae	Gravenhorstiini	Perisphincter	Perisphincter gracilicornis	Schnee, 1978
Arthropoda	Insecta	Hymenoptera	Ichneumonidae	Anomaloninae	Gravenhorstiini	Therion	Therion brevicorne	(Gravenhorst, 1829)
Arthropoda	Insecta	Hymenoptera	Ichneumonidae	Anomaloninae	Gravenhorstiini	Therion	Therion circumflexum	(Linnaeus, 1758)
Arthropoda	Insecta	Hymenoptera	Ichneumonidae	Anomaloninae	Gravenhorstiini	Therion	Therion ericae	Bauer, 1967
Arthropoda	Insecta	Hymenoptera	Ichneumonidae	Anomaloninae	Gravenhorstiini	Therion	Therion giganteum	(Gravenhorst, 1829)
Arthropoda	Insecta	Hymenoptera	Ichneumonidae	Anomaloninae	Gravenhorstiini	Trichomma	Trichomma enecator	(Rossi, 1790)
Arthropoda	Insecta	Hymenoptera	Ichneumonidae	Anomaloninae	Gravenhorstiini	Trichomma	Trichomma fulvidens	Wesmael, 1849
Arthropoda	Insecta	Hymenoptera	Ichneumonidae	Anomaloninae	Gravenhorstiini	Trichomma	Trichomma intermedium	Krieger, 1904
Arthropoda	Insecta	Hymenoptera	Ichneumonidae	Anomaloninae	Gravenhorstiini	Trichomma	Trichomma occisor	Habermehl, 1909
Arthropoda	Insecta	Hymenoptera	Ichneumonidae	Ateleutinae		Ateleute	Ateleute linearis	Förster, 1871
Arthropoda	Insecta	Hymenoptera	Ichneumonidae	Banchinae	Atrophini	Alloplasta	Alloplasta piceator	(Thunberg, 1824)
Arthropoda	Insecta	Hymenoptera	Ichneumonidae	Banchinae	Atrophini	Alloplasta	Alloplasta plantaria	(Gravenhorst, 1829)
Arthropoda	Insecta	Hymenoptera	Ichneumonidae	Banchinae	Atrophini	Alloplasta	Alloplasta tomentosa	(Gravenhorst, 1829)
Arthropoda	Insecta	Hymenoptera	Ichneumonidae	Banchinae	Atrophini	Arenetra	Arenetra pilosella	(Gravenhorst, 1829)
Arthropoda	Insecta	Hymenoptera	Ichneumonidae	Banchinae	Atrophini	Cryptopimpla	Cryptopimpla alpigena	(Strobl, 1902)
Arthropoda	Insecta	Hymenoptera	Ichneumonidae	Banchinae	Atrophini	Cryptopimpla	Cryptopimpla anomala	(Holmgren, 1860)
Arthropoda	Insecta	Hymenoptera	Ichneumonidae	Banchinae	Atrophini	Cryptopimpla	Cryptopimpla arvicola	(Gravenhorst, 1829)
Arthropoda	Insecta	Hymenoptera	Ichneumonidae	Banchinae	Atrophini	Cryptopimpla	Cryptopimpla brevicaudis	(Habermehl, 1903)
Arthropoda	Insecta	Hymenoptera	Ichneumonidae	Banchinae	Atrophini	Cryptopimpla	Cryptopimpla calceolata	(Gravenhorst, 1829)
Arthropoda	Insecta	Hymenoptera	Ichneumonidae	Banchinae	Atrophini	Cryptopimpla	Cryptopimpla caligata	(Gravenhorst, 1829)
Arthropoda	Insecta	Hymenoptera	Ichneumonidae	Banchinae	Atrophini	Cryptopimpla	Cryptopimpla errabunda	(Gravenhorst, 1829)
Arthropoda	Insecta	Hymenoptera	Ichneumonidae	Banchinae	Atrophini	Cryptopimpla	Cryptopimpla helvetica	Brauns, 1901
Arthropoda	Insecta	Hymenoptera	Ichneumonidae	Banchinae	Atrophini	Cryptopimpla	Cryptopimpla hertrichi	Heinrich, 1952
Arthropoda	Insecta	Hymenoptera	Ichneumonidae	Banchinae	Atrophini	Cryptopimpla	Cryptopimpla quadrilineata	(Gravenhorst, 1829)
Arthropoda	Insecta	Hymenoptera	Ichneumonidae	Banchinae	Atrophini	Cryptopimpla	Cryptopimpla solitaria	(Schmiedeknecht, 1900)
Arthropoda	Insecta	Hymenoptera	Ichneumonidae	Banchinae	Atrophini	Cryptopimpla	Cryptopimpla sordida	(Hedwig, 1932)
Arthropoda	Insecta	Hymenoptera	Ichneumonidae	Banchinae	Atrophini	Cryptopimpla	Cryptopimpla subfumata	(Thomson, 1877)
Arthropoda	Insecta	Hymenoptera	Ichneumonidae	Banchinae	Atrophini	Lissonota	Lissonota accusator	(Fabricius, 1793)
Arthropoda	Insecta	Hymenoptera	Ichneumonidae	Banchinae	Atrophini	Lissonota	Lissonota admontensis	Strobl, 1902
Arthropoda	Insecta	Hymenoptera	Ichneumonidae	Banchinae	Atrophini	Lissonota	Lissonota albicoxis	Kriechbaumer, 1888
Arthropoda	Insecta	Hymenoptera	Ichneumonidae	Banchinae	Atrophini	Lissonota	Lissonota angusta	Taschenberg, 1863
Arthropoda	Insecta	Hymenoptera	Ichneumonidae	Banchinae	Atrophini	Lissonota	Lissonota antennalis	Thomson, 1877
Arthropoda	Insecta	Hymenoptera	Ichneumonidae	Banchinae	Atrophini	Lissonota	Lissonota argiola	Gravenhorst, 1829
Arthropoda	Insecta	Hymenoptera	Ichneumonidae	Banchinae	Atrophini	Lissonota	Lissonota atropos	Schmiedeknecht, 1900
Arthropoda	Insecta	Hymenoptera	Ichneumonidae	Banchinae	Atrophini	Lissonota	Lissonota biguttata	Holmgren, 1860
Arthropoda	Insecta	Hymenoptera	Ichneumonidae	Banchinae	Atrophini	Lissonota	Lissonota bilineata	Gravenhorst, 1829
Arthropoda	Insecta	Hymenoptera	Ichneumonidae	Banchinae	Atrophini	Lissonota	Lissonota bistrigata	Holmgren, 1860
Arthropoda	Insecta	Hymenoptera	Ichneumonidae	Banchinae	Atrophini	Lissonota	Lissonota buccator	(Thunberg, 1824)
Arthropoda	Insecta	Hymenoptera	Ichneumonidae	Banchinae	Atrophini	Lissonota	Lissonota buolianae	Hartig, 1838
Arthropoda	Insecta	Hymenoptera	Ichneumonidae	Banchinae	Atrophini	Lissonota	Lissonota carbonaria	Holmgren, 1860
Arthropoda	Insecta	Hymenoptera	Ichneumonidae	Banchinae	Atrophini	Lissonota	Lissonota clypealis	Thomson, 1877
Arthropoda	Insecta	Hymenoptera	Ichneumonidae	Banchinae	Atrophini	Lissonota	Lissonota clypeator	(Gravenhorst, 1820)
Arthropoda	Insecta	Hymenoptera	Ichneumonidae	Banchinae	Atrophini	Lissonota	Lissonota complicator	Aubert, 1967
Arthropoda	Insecta	Hymenoptera	Ichneumonidae	Banchinae	Atrophini	Lissonota	Lissonota conflagrata	Gravenhorst, 1829
Arthropoda	Insecta	Hymenoptera	Ichneumonidae	Banchinae	Atrophini	Lissonota	Lissonota confusa	Rey del Castillo, 1992
Arthropoda	Insecta	Hymenoptera	Ichneumonidae	Banchinae	Atrophini	Lissonota	Lissonota coracina	(Gmelin, 1790)
Arthropoda	Insecta	Hymenoptera	Ichneumonidae	Banchinae	Atrophini	Lissonota	Lissonota cruentator	(Panzer, 1809)
Arthropoda	Insecta	Hymenoptera	Ichneumonidae	Banchinae	Atrophini	Lissonota	Lissonota culiciformis	Gravenhorst, 1829
Arthropoda	Insecta	Hymenoptera	Ichneumonidae	Banchinae	Atrophini	Lissonota	Lissonota deversor	Gravenhorst, 1829
Arthropoda	Insecta	Hymenoptera	Ichneumonidae	Banchinae	Atrophini	Lissonota	Lissonota digestor	(Thunberg, 1824)
Arthropoda	Insecta	Hymenoptera	Ichneumonidae	Banchinae	Atrophini	Lissonota	Lissonota distincta	Bridgman, 1889
Arthropoda	Insecta	Hymenoptera	Ichneumonidae	Banchinae	Atrophini	Lissonota	Lissonota dubia	Holmgren, 1856
Arthropoda	Insecta	Hymenoptera	Ichneumonidae	Banchinae	Atrophini	Lissonota	Lissonota erythrina	Holmgren, 1860
Arthropoda	Insecta	Hymenoptera	Ichneumonidae	Banchinae	Atrophini	Lissonota	Lissonota excelsa	Schmiedeknecht, 1900
Arthropoda	Insecta	Hymenoptera	Ichneumonidae	Banchinae	Atrophini	Lissonota	Lissonota extrema	Hedwig, 1932
Arthropoda	Insecta	Hymenoptera	Ichneumonidae	Banchinae	Atrophini	Lissonota	Lissonota folii	Thomson, 1877
Arthropoda	Insecta	Hymenoptera	Ichneumonidae	Banchinae	Atrophini	Lissonota	Lissonota freyi	(Hellén, 1915)
Arthropoda	Insecta	Hymenoptera	Ichneumonidae	Banchinae	Atrophini	Lissonota	Lissonota frontalis	(Desvignes, 1856)
Arthropoda	Insecta	Hymenoptera	Ichneumonidae	Banchinae	Atrophini	Lissonota	Lissonota fundator	(Thunberg, 1824)
Arthropoda	Insecta	Hymenoptera	Ichneumonidae	Banchinae	Atrophini	Lissonota	Lissonota funebris	Habermehl, 1923
Arthropoda	Insecta	Hymenoptera	Ichneumonidae	Banchinae	Atrophini	Lissonota	Lissonota gracilenta	Holmgren, 1860
Arthropoda	Insecta	Hymenoptera	Ichneumonidae	Banchinae	Atrophini	Lissonota	Lissonota gracilipes	Thomson, 1877
Arthropoda	Insecta	Hymenoptera	Ichneumonidae	Banchinae	Atrophini	Lissonota	Lissonota histrio	(Fabricius, 1798)
Arthropoda	Insecta	Hymenoptera	Ichneumonidae	Banchinae	Atrophini	Lissonota	Lissonota humerella	Thomson, 1877
Arthropoda	Insecta	Hymenoptera	Ichneumonidae	Banchinae	Atrophini	Lissonota	Lissonota impressor	Gravenhorst, 1829
Arthropoda	Insecta	Hymenoptera	Ichneumonidae	Banchinae	Atrophini	Lissonota	Lissonota inareolata	Pfeffer, 1913
Arthropoda	Insecta	Hymenoptera	Ichneumonidae	Banchinae	Atrophini	Lissonota	Lissonota inconspicua	Schmiedeknecht, 1935
Arthropoda	Insecta	Hymenoptera	Ichneumonidae	Banchinae	Atrophini	Lissonota	Lissonota linearis	Gravenhorst, 1829
Arthropoda	Insecta	Hymenoptera	Ichneumonidae	Banchinae	Atrophini	Lissonota	Lissonota lineata	Gravenhorst, 1829
Arthropoda	Insecta	Hymenoptera	Ichneumonidae	Banchinae	Atrophini	Lissonota	Lissonota lineolaris	(Gmelin, 1790)
Arthropoda	Insecta	Hymenoptera	Ichneumonidae	Banchinae	Atrophini	Lissonota	Lissonota maculata	Brischke, 1865
Arthropoda	Insecta	Hymenoptera	Ichneumonidae	Banchinae	Atrophini	Lissonota	Lissonota magdalenae	Pfankuch, 1921
Arthropoda	Insecta	Hymenoptera	Ichneumonidae	Banchinae	Atrophini	Lissonota	Lissonota manca	Brauns, 1896
Arthropoda	Insecta	Hymenoptera	Ichneumonidae	Banchinae	Atrophini	Lissonota	Lissonota mutator	Aubert, 1969
Arthropoda	Insecta	Hymenoptera	Ichneumonidae	Banchinae	Atrophini	Lissonota	Lissonota nigridens	Thomson, 1889
Arthropoda	Insecta	Hymenoptera	Ichneumonidae	Banchinae	Atrophini	Lissonota	Lissonota nitida	(Gravenhorst, 1829)
Arthropoda	Insecta	Hymenoptera	Ichneumonidae	Banchinae	Atrophini	Lissonota	Lissonota obscuripes	Strobl, 1902
Arthropoda	Insecta	Hymenoptera	Ichneumonidae	Banchinae	Atrophini	Lissonota	Lissonota obsoleta	Bridgman, 1889
Arthropoda	Insecta	Hymenoptera	Ichneumonidae	Banchinae	Atrophini	Lissonota	Lissonota oculatoria	(Fabricius, 1798)
Arthropoda	Insecta	Hymenoptera	Ichneumonidae	Banchinae	Atrophini	Lissonota	Lissonota palpalis	Thomson, 1889
Arthropoda	Insecta	Hymenoptera	Ichneumonidae	Banchinae	Atrophini	Lissonota	Lissonota parasitellae	Horstmann, 2003
Arthropoda	Insecta	Hymenoptera	Ichneumonidae	Banchinae	Atrophini	Lissonota	Lissonota perspicillator	Gravenhorst, 1829
Arthropoda	Insecta	Hymenoptera	Ichneumonidae	Banchinae	Atrophini	Lissonota	Lissonota picticoxis	Schmiedeknecht, 1900
Arthropoda	Insecta	Hymenoptera	Ichneumonidae	Banchinae	Atrophini	Lissonota	Lissonota pimplator	(Zetterstedt, 1838)
Arthropoda	Insecta	Hymenoptera	Ichneumonidae	Banchinae	Atrophini	Lissonota	Lissonota pleuralis	Brischke, 1880
Arthropoda	Insecta	Hymenoptera	Ichneumonidae	Banchinae	Atrophini	Lissonota	Lissonota proxima	Fonscolombe, 1854
Arthropoda	Insecta	Hymenoptera	Ichneumonidae	Banchinae	Atrophini	Lissonota	Lissonota punctiventrator	Aubert, 1977
Arthropoda	Insecta	Hymenoptera	Ichneumonidae	Banchinae	Atrophini	Lissonota	Lissonota punctiventris	Thomson, 1877
Arthropoda	Insecta	Hymenoptera	Ichneumonidae	Banchinae	Atrophini	Lissonota	Lissonota quadrinotata	Gravenhorst, 1829
Arthropoda	Insecta	Hymenoptera	Ichneumonidae	Banchinae	Atrophini	Lissonota	Lissonota rufipes	Brischke, 1865
Arthropoda	Insecta	Hymenoptera	Ichneumonidae	Banchinae	Atrophini	Lissonota	Lissonota rufitarsis	Szépligeti, 1899
Arthropoda	Insecta	Hymenoptera	Ichneumonidae	Banchinae	Atrophini	Lissonota	Lissonota sahlbergi	Hellén, 1915
Arthropoda	Insecta	Hymenoptera	Ichneumonidae	Banchinae	Atrophini	Lissonota	Lissonota saturator	(Thunberg, 1824)
Arthropoda	Insecta	Hymenoptera	Ichneumonidae	Banchinae	Atrophini	Lissonota	Lissonota sector	(Thunberg, 1824)
Arthropoda	Insecta	Hymenoptera	Ichneumonidae	Banchinae	Atrophini	Lissonota	Lissonota setosa	(Geoffroy, 1785)
Arthropoda	Insecta	Hymenoptera	Ichneumonidae	Banchinae	Atrophini	Lissonota	Lissonota silvatica	Habermehl, 1918
Arthropoda	Insecta	Hymenoptera	Ichneumonidae	Banchinae	Atrophini	Lissonota	Lissonota stigmator	Aubert, 1972
Arthropoda	Insecta	Hymenoptera	Ichneumonidae	Banchinae	Atrophini	Lissonota	Lissonota subaciculata	Bridgman, 1886
Arthropoda	Insecta	Hymenoptera	Ichneumonidae	Banchinae	Atrophini	Lissonota	Lissonota tenerrima	Thomson, 1877
Arthropoda	Insecta	Hymenoptera	Ichneumonidae	Banchinae	Atrophini	Lissonota	Lissonota thuringiaca	(Schmiedeknecht, 1900)
Arthropoda	Insecta	Hymenoptera	Ichneumonidae	Banchinae	Atrophini	Lissonota	Lissonota transversostriata	(Smits van Burgst, 1921)
Arthropoda	Insecta	Hymenoptera	Ichneumonidae	Banchinae	Atrophini	Lissonota	Lissonota ulbrichtii	(Ulbricht, 1909)
Arthropoda	Insecta	Hymenoptera	Ichneumonidae	Banchinae	Atrophini	Lissonota	Lissonota variabilis	Holmgren, 1860
Arthropoda	Insecta	Hymenoptera	Ichneumonidae	Banchinae	Atrophini	Syzeuctus	Syzeuctus bicolor	Szépligeti, 1899
Arthropoda	Insecta	Hymenoptera	Ichneumonidae	Banchinae	Atrophini	Syzeuctus	Syzeuctus bicornis	(Gravenhorst, 1829)
Arthropoda	Insecta	Hymenoptera	Ichneumonidae	Banchinae	Atrophini	Syzeuctus	Syzeuctus fuscator	(Panzer, 1809)
Arthropoda	Insecta	Hymenoptera	Ichneumonidae	Banchinae	Atrophini	Syzeuctus	Syzeuctus inaequalis	(Fonscolombe, 1854)
Arthropoda	Insecta	Hymenoptera	Ichneumonidae	Banchinae	Atrophini	Syzeuctus	Syzeuctus irrisorius	(Rossi, 1794)
Arthropoda	Insecta	Hymenoptera	Ichneumonidae	Banchinae	Atrophini	Syzeuctus	Syzeuctus petiolaris	(Gravenhorst, 1829)
Arthropoda	Insecta	Hymenoptera	Ichneumonidae	Banchinae	Banchini	Banchus	Banchus crefeldensis	Ulbricht, 1916
Arthropoda	Insecta	Hymenoptera	Ichneumonidae	Banchinae	Banchini	Banchus	Banchus dilatatorius	(Thunberg, 1824)
Arthropoda	Insecta	Hymenoptera	Ichneumonidae	Banchinae	Banchini	Banchus	Banchus falcatorius	(Fabricius, 1775)
Arthropoda	Insecta	Hymenoptera	Ichneumonidae	Banchinae	Banchini	Banchus	Banchus hastator	(Fabricius, 1793)
Arthropoda	Insecta	Hymenoptera	Ichneumonidae	Banchinae	Banchini	Banchus	Banchus palpalis	Ruthe, 1859
Arthropoda	Insecta	Hymenoptera	Ichneumonidae	Banchinae	Banchini	Banchus	Banchus pictus	Fabricius, 1798
Arthropoda	Insecta	Hymenoptera	Ichneumonidae	Banchinae	Banchini	Banchus	Banchus volutatorius	(Linnaeus, 1758)
Arthropoda	Insecta	Hymenoptera	Ichneumonidae	Banchinae	Banchini	Exetastes	Exetastes adpressorius	(Thunberg, 1824)
Arthropoda	Insecta	Hymenoptera	Ichneumonidae	Banchinae	Banchini	Exetastes	Exetastes albiger	Kriechbaumer, 1886
Arthropoda	Insecta	Hymenoptera	Ichneumonidae	Banchinae	Banchini	Exetastes	Exetastes alpius	(Heinrich, 1952)
Arthropoda	Insecta	Hymenoptera	Ichneumonidae	Banchinae	Banchini	Exetastes	Exetastes atrator	(Forster, 1771)
Arthropoda	Insecta	Hymenoptera	Ichneumonidae	Banchinae	Banchini	Exetastes	Exetastes bilineatus	Gravenhorst, 1829
Arthropoda	Insecta	Hymenoptera	Ichneumonidae	Banchinae	Banchini	Exetastes	Exetastes calobatus	Gravenhorst, 1829
Arthropoda	Insecta	Hymenoptera	Ichneumonidae	Banchinae	Banchini	Exetastes	Exetastes crassus	Gravenhorst, 1829
Arthropoda	Insecta	Hymenoptera	Ichneumonidae	Banchinae	Banchini	Exetastes	Exetastes degener	(Gravenhorst, 1829)
Arthropoda	Insecta	Hymenoptera	Ichneumonidae	Banchinae	Banchini	Exetastes	Exetastes femorator	Desvignes, 1856
Arthropoda	Insecta	Hymenoptera	Ichneumonidae	Banchinae	Banchini	Exetastes	Exetastes fornicator	(Fabricius, 1781)
Arthropoda	Insecta	Hymenoptera	Ichneumonidae	Banchinae	Banchini	Exetastes	Exetastes geniculosus	Holmgren, 1860
Arthropoda	Insecta	Hymenoptera	Ichneumonidae	Banchinae	Banchini	Exetastes	Exetastes gracilicornis	Gravenhorst, 1829
Arthropoda	Insecta	Hymenoptera	Ichneumonidae	Banchinae	Banchini	Exetastes	Exetastes ichneumoniformis	Gravenhorst, 1829
Arthropoda	Insecta	Hymenoptera	Ichneumonidae	Banchinae	Banchini	Exetastes	Exetastes illusor	Gravenhorst, 1829
Arthropoda	Insecta	Hymenoptera	Ichneumonidae	Banchinae	Banchini	Exetastes	Exetastes illyricus	Strobl, 1904
Arthropoda	Insecta	Hymenoptera	Ichneumonidae	Banchinae	Banchini	Exetastes	Exetastes inquisitor	Gravenhorst, 1829
Arthropoda	Insecta	Hymenoptera	Ichneumonidae	Banchinae	Banchini	Exetastes	Exetastes laevigator	(Villers, 1789)
Arthropoda	Insecta	Hymenoptera	Ichneumonidae	Banchinae	Banchini	Exetastes	Exetastes nigripes	Gravenhorst, 1829
Arthropoda	Insecta	Hymenoptera	Ichneumonidae	Banchinae	Banchini	Exetastes	Exetastes notatus	Holmgren, 1860
Arthropoda	Insecta	Hymenoptera	Ichneumonidae	Banchinae	Banchini	Exetastes	Exetastes robustus	Gravenhorst, 1829
Arthropoda	Insecta	Hymenoptera	Ichneumonidae	Banchinae	Banchini	Exetastes	Exetastes rufifemur	Horstmann & Yu, 1999
Arthropoda	Insecta	Hymenoptera	Ichneumonidae	Banchinae	Banchini	Exetastes	Exetastes tibialis	Pfankuch, 1921
Arthropoda	Insecta	Hymenoptera	Ichneumonidae	Banchinae	Banchini	Exetastes	Exetastes tomentosus	(Gravenhorst, 1829)
Arthropoda	Insecta	Hymenoptera	Ichneumonidae	Banchinae	Banchini	Exetastes	Exetastes ziegleri	(Gravenhorst, 1829)
Arthropoda	Insecta	Hymenoptera	Ichneumonidae	Banchinae	Banchini	Rynchobanchus	Rynchobanchus bicolor	Kriechbaumer, 1894
Arthropoda	Insecta	Hymenoptera	Ichneumonidae	Banchinae	Banchini	Rynchobanchus	Rynchobanchus flavopictus	Heinrich, 1937
Arthropoda	Insecta	Hymenoptera	Ichneumonidae	Banchinae	Glyptini	Apophua	Apophua bipunctoria	(Thunberg, 1824)
Arthropoda	Insecta	Hymenoptera	Ichneumonidae	Banchinae	Glyptini	Apophua	Apophua cicatricosa	(Ratzeburg, 1848)
Arthropoda	Insecta	Hymenoptera	Ichneumonidae	Banchinae	Glyptini	Apophua	Apophua evanescens	(Ratzeburg, 1848)
Arthropoda	Insecta	Hymenoptera	Ichneumonidae	Banchinae	Glyptini	Apophua	Apophua genalis	(Möller, 1883)
Arthropoda	Insecta	Hymenoptera	Ichneumonidae	Banchinae	Glyptini	Cephaloglypta	Cephaloglypta murinanae	(Bauer, 1941)
Arthropoda	Insecta	Hymenoptera	Ichneumonidae	Banchinae	Glyptini	Diblastomorpha	Diblastomorpha cylindrator	(Fabricius, 1787)
Arthropoda	Insecta	Hymenoptera	Ichneumonidae	Banchinae	Glyptini	Glypta	Glypta albanica	Habermehl, 1926
Arthropoda	Insecta	Hymenoptera	Ichneumonidae	Banchinae	Glyptini	Glypta	Glypta biauriculata	Strobl, 1901
Arthropoda	Insecta	Hymenoptera	Ichneumonidae	Banchinae	Glyptini	Glypta	Glypta bifoveolata	Gravenhorst, 1829
Arthropoda	Insecta	Hymenoptera	Ichneumonidae	Banchinae	Glyptini	Glypta	Glypta brevipetiolata	Thomson, 1889
Arthropoda	Insecta	Hymenoptera	Ichneumonidae	Banchinae	Glyptini	Glypta	Glypta caudata	Thomson, 1889
Arthropoda	Insecta	Hymenoptera	Ichneumonidae	Banchinae	Glyptini	Glypta	Glypta ceratites	Gravenhorst, 1829
Arthropoda	Insecta	Hymenoptera	Ichneumonidae	Banchinae	Glyptini	Glypta	Glypta consimilis	Holmgren, 1860
Arthropoda	Insecta	Hymenoptera	Ichneumonidae	Banchinae	Glyptini	Glypta	Glypta dentifera	Thomson, 1889
Arthropoda	Insecta	Hymenoptera	Ichneumonidae	Banchinae	Glyptini	Glypta	Glypta elongata	Holmgren, 1860
Arthropoda	Insecta	Hymenoptera	Ichneumonidae	Banchinae	Glyptini	Glypta	Glypta exophthalmus	Kriechbaumer, 1887
Arthropoda	Insecta	Hymenoptera	Ichneumonidae	Banchinae	Glyptini	Glypta	Glypta extincta	Ratzeburg, 1852
Arthropoda	Insecta	Hymenoptera	Ichneumonidae	Banchinae	Glyptini	Glypta	Glypta femorator	Desvignes, 1856
Arthropoda	Insecta	Hymenoptera	Ichneumonidae	Banchinae	Glyptini	Glypta	Glypta fronticornis	Gravenhorst, 1829
Arthropoda	Insecta	Hymenoptera	Ichneumonidae	Banchinae	Glyptini	Glypta	Glypta haesitator	Gravenhorst, 1829
Arthropoda	Insecta	Hymenoptera	Ichneumonidae	Banchinae	Glyptini	Glypta	Glypta heterocera	Thomson, 1889
Arthropoda	Insecta	Hymenoptera	Ichneumonidae	Banchinae	Glyptini	Glypta	Glypta incisa	Gravenhorst, 1829
Arthropoda	Insecta	Hymenoptera	Ichneumonidae	Banchinae	Glyptini	Glypta	Glypta lapponica	Holmgren, 1860
Arthropoda	Insecta	Hymenoptera	Ichneumonidae	Banchinae	Glyptini	Glypta	Glypta lineata	Desvignes, 1856
Arthropoda	Insecta	Hymenoptera	Ichneumonidae	Banchinae	Glyptini	Glypta	Glypta longicauda	Hartig, 1838
Arthropoda	Insecta	Hymenoptera	Ichneumonidae	Banchinae	Glyptini	Glypta	Glypta longispinis	(Gmelin, 1790)
Arthropoda	Insecta	Hymenoptera	Ichneumonidae	Banchinae	Glyptini	Glypta	Glypta mensurator	(Fabricius, 1775)
Arthropoda	Insecta	Hymenoptera	Ichneumonidae	Banchinae	Glyptini	Glypta	Glypta microcera	Thomson, 1889
Arthropoda	Insecta	Hymenoptera	Ichneumonidae	Banchinae	Glyptini	Glypta	Glypta monoceros	Gravenhorst, 1829
Arthropoda	Insecta	Hymenoptera	Ichneumonidae	Banchinae	Glyptini	Glypta	Glypta nigricornis	Thomson, 1889
Arthropoda	Insecta	Hymenoptera	Ichneumonidae	Banchinae	Glyptini	Glypta	Glypta nigrina	Desvignes, 1856
Arthropoda	Insecta	Hymenoptera	Ichneumonidae	Banchinae	Glyptini	Glypta	Glypta nigroplica	Thomson, 1889
Arthropoda	Insecta	Hymenoptera	Ichneumonidae	Banchinae	Glyptini	Glypta	Glypta parvicaudata	Bridgman, 1889
Arthropoda	Insecta	Hymenoptera	Ichneumonidae	Banchinae	Glyptini	Glypta	Glypta pedata	Desvignes, 1856
Arthropoda	Insecta	Hymenoptera	Ichneumonidae	Banchinae	Glyptini	Glypta	Glypta pictipes	Taschenberg, 1863
Arthropoda	Insecta	Hymenoptera	Ichneumonidae	Banchinae	Glyptini	Glypta	Glypta resinanae	Hartig, 1838
Arthropoda	Insecta	Hymenoptera	Ichneumonidae	Banchinae	Glyptini	Glypta	Glypta rufata	Bridgman, 1887
Arthropoda	Insecta	Hymenoptera	Ichneumonidae	Banchinae	Glyptini	Glypta	Glypta salicis	Thomson, 1889
Arthropoda	Insecta	Hymenoptera	Ichneumonidae	Banchinae	Glyptini	Glypta	Glypta salsolicola	Schmiedeknecht, 1907
Arthropoda	Insecta	Hymenoptera	Ichneumonidae	Banchinae	Glyptini	Glypta	Glypta scalaris	Gravenhorst, 1829
Arthropoda	Insecta	Hymenoptera	Ichneumonidae	Banchinae	Glyptini	Glypta	Glypta schneideri	Krieger, 1897
Arthropoda	Insecta	Hymenoptera	Ichneumonidae	Banchinae	Glyptini	Glypta	Glypta sculpturata	Gravenhorst, 1829
Arthropoda	Insecta	Hymenoptera	Ichneumonidae	Banchinae	Glyptini	Glypta	Glypta scutellaris	Thomson, 1889
Arthropoda	Insecta	Hymenoptera	Ichneumonidae	Banchinae	Glyptini	Glypta	Glypta similis	Bridgman, 1886
Arthropoda	Insecta	Hymenoptera	Ichneumonidae	Banchinae	Glyptini	Glypta	Glypta tegularis	Thomson, 1889
Arthropoda	Insecta	Hymenoptera	Ichneumonidae	Banchinae	Glyptini	Glypta	Glypta tenuicornis	Thomson, 1889
Arthropoda	Insecta	Hymenoptera	Ichneumonidae	Banchinae	Glyptini	Glypta	Glypta teres	Gravenhorst, 1829
Arthropoda	Insecta	Hymenoptera	Ichneumonidae	Banchinae	Glyptini	Glypta	Glypta trochanterata	Bridgman, 1886
Arthropoda	Insecta	Hymenoptera	Ichneumonidae	Banchinae	Glyptini	Glypta	Glypta vulnerator	Gravenhorst, 1829
Arthropoda	Insecta	Hymenoptera	Ichneumonidae	Banchinae	Glyptini	Glypta	Glypta woerzi	(Hedwig, 1952)
Arthropoda	Insecta	Hymenoptera	Ichneumonidae	Banchinae	Glyptini	Teleutaea	Teleutaea brischkei	(Holmgren, 1860)
Arthropoda	Insecta	Hymenoptera	Ichneumonidae	Banchinae	Glyptini	Teleutaea	Teleutaea striata	(Gravenhorst, 1829)
Arthropoda	Insecta	Hymenoptera	Ichneumonidae	Brachycyrtinae		Brachycyrtus	Brachycyrtus ornatus	Kriechbaumer, 1880
Arthropoda	Insecta	Hymenoptera	Ichneumonidae	Campopleginae		Alcima	Alcima orbitale	(Gravenhorst, 1829)
Arthropoda	Insecta	Hymenoptera	Ichneumonidae	Campopleginae		Bathyplectes	Bathyplectes anurus	(Thomson, 1887)
Arthropoda	Insecta	Hymenoptera	Ichneumonidae	Campopleginae		Bathyplectes	Bathyplectes balteatus	(Thomson, 1887)
Arthropoda	Insecta	Hymenoptera	Ichneumonidae	Campopleginae		Bathyplectes	Bathyplectes carinatus	Horstmann, 1974
Arthropoda	Insecta	Hymenoptera	Ichneumonidae	Campopleginae		Bathyplectes	Bathyplectes cingulatus	(Brischke, 1880)
Arthropoda	Insecta	Hymenoptera	Ichneumonidae	Campopleginae		Bathyplectes	Bathyplectes clypearis	(Horstmann, 1974)
Arthropoda	Insecta	Hymenoptera	Ichneumonidae	Campopleginae		Bathyplectes	Bathyplectes curculionis	(Thomson, 1887)
Arthropoda	Insecta	Hymenoptera	Ichneumonidae	Campopleginae		Bathyplectes	Bathyplectes exiguus	(Gravenhorst, 1829)
Arthropoda	Insecta	Hymenoptera	Ichneumonidae	Campopleginae		Bathyplectes	Bathyplectes immolator	(Gravenhorst, 1829)
Arthropoda	Insecta	Hymenoptera	Ichneumonidae	Campopleginae		Bathyplectes	Bathyplectes incisus	Horstmann, 1974
Arthropoda	Insecta	Hymenoptera	Ichneumonidae	Campopleginae		Bathyplectes	Bathyplectes infernalis	(Gravenhorst, 1820)
Arthropoda	Insecta	Hymenoptera	Ichneumonidae	Campopleginae		Bathyplectes	Bathyplectes quinqueangularis	(Ratzeburg, 1852)
Arthropoda	Insecta	Hymenoptera	Ichneumonidae	Campopleginae		Bathyplectes	Bathyplectes rostratus	(Thomson, 1887)
Arthropoda	Insecta	Hymenoptera	Ichneumonidae	Campopleginae		Bathyplectes	Bathyplectes rufipes	Horstmann, 1974
Arthropoda	Insecta	Hymenoptera	Ichneumonidae	Campopleginae		Bathyplectes	Bathyplectes stenostigma	(Thomson, 1887)
Arthropoda	Insecta	Hymenoptera	Ichneumonidae	Campopleginae		Bathyplectes	Bathyplectes tibiator	(Gravenhorst, 1820)
Arthropoda	Insecta	Hymenoptera	Ichneumonidae	Campopleginae		Callidora	Callidora albovincta	(Holmgren, 1860)
Arthropoda	Insecta	Hymenoptera	Ichneumonidae	Campopleginae		Callidora	Callidora analis	(Gravenhorst, 1829)
Arthropoda	Insecta	Hymenoptera	Ichneumonidae	Campopleginae		Campoletis	Campoletis agilis	(Holmgren, 1860)
Arthropoda	Insecta	Hymenoptera	Ichneumonidae	Campopleginae		Campoletis	Campoletis annulata	(Gravenhorst, 1829)
Arthropoda	Insecta	Hymenoptera	Ichneumonidae	Campopleginae		Campoletis	Campoletis cognata	(Tschek, 1871)
Arthropoda	Insecta	Hymenoptera	Ichneumonidae	Campopleginae		Campoletis	Campoletis congesta	(Holmgren, 1860)
Arthropoda	Insecta	Hymenoptera	Ichneumonidae	Campopleginae		Campoletis	Campoletis crassicornis	(Tschek, 1871)
Arthropoda	Insecta	Hymenoptera	Ichneumonidae	Campopleginae		Campoletis	Campoletis cubicator	Aubert, 1974
Arthropoda	Insecta	Hymenoptera	Ichneumonidae	Campopleginae		Campoletis	Campoletis dilatator	(Thunberg, 1824)
Arthropoda	Insecta	Hymenoptera	Ichneumonidae	Campopleginae		Campoletis	Campoletis ensator	(Gravenhorst, 1829)
Arthropoda	Insecta	Hymenoptera	Ichneumonidae	Campopleginae		Campoletis	Campoletis excavata	(Smits van Burgst, 1914)
Arthropoda	Insecta	Hymenoptera	Ichneumonidae	Campopleginae		Campoletis	Campoletis fasciata	(Bridgman, 1887)
Arthropoda	Insecta	Hymenoptera	Ichneumonidae	Campopleginae		Campoletis	Campoletis femoralis	(Gravenhorst, 1829)
Arthropoda	Insecta	Hymenoptera	Ichneumonidae	Campopleginae		Campoletis	Campoletis flagellator	Riedel, 2017
Arthropoda	Insecta	Hymenoptera	Ichneumonidae	Campopleginae		Campoletis	Campoletis fuscipes	(Holmgren, 1856)
Arthropoda	Insecta	Hymenoptera	Ichneumonidae	Campopleginae		Campoletis	Campoletis hinzi	Riedel, 2017
Arthropoda	Insecta	Hymenoptera	Ichneumonidae	Campopleginae		Campoletis	Campoletis latrator	(Gravenhorst, 1829)
Arthropoda	Insecta	Hymenoptera	Ichneumonidae	Campopleginae		Campoletis	Campoletis nigritrochantellus	Riedel, 2017
Arthropoda	Insecta	Hymenoptera	Ichneumonidae	Campopleginae		Campoletis	Campoletis pectalis	Riedel, 2017
Arthropoda	Insecta	Hymenoptera	Ichneumonidae	Campopleginae		Campoletis	Campoletis postica	(Bridgman & Fitch, 1885)
Arthropoda	Insecta	Hymenoptera	Ichneumonidae	Campopleginae		Campoletis	Campoletis procerus	(Brischke, 1880)
Arthropoda	Insecta	Hymenoptera	Ichneumonidae	Campopleginae		Campoletis	Campoletis punctata	(Bridgman, 1886)
Arthropoda	Insecta	Hymenoptera	Ichneumonidae	Campopleginae		Campoletis	Campoletis rapax	(Gravenhorst, 1829)
Arthropoda	Insecta	Hymenoptera	Ichneumonidae	Campopleginae		Campoletis	Campoletis raptor	(Zetterstedt, 1838)
Arthropoda	Insecta	Hymenoptera	Ichneumonidae	Campopleginae		Campoletis	Campoletis rubidatae	Riedel, 2017
Arthropoda	Insecta	Hymenoptera	Ichneumonidae	Campopleginae		Campoletis	Campoletis rufifasciatae	Riedel, 2017
Arthropoda	Insecta	Hymenoptera	Ichneumonidae	Campopleginae		Campoletis	Campoletis thomsoni	(Roman, 1915)
Arthropoda	Insecta	Hymenoptera	Ichneumonidae	Campopleginae		Campoletis	Campoletis trichoptili	(Bauer, 1936)
Arthropoda	Insecta	Hymenoptera	Ichneumonidae	Campopleginae		Campoletis	Campoletis varians	(Thomson, 1887)
Arthropoda	Insecta	Hymenoptera	Ichneumonidae	Campopleginae		Campoletis	Campoletis variator	Riedel, 2017
Arthropoda	Insecta	Hymenoptera	Ichneumonidae	Campopleginae		Campoletis	Campoletis viennensis	(Gravenhorst, 1829)
Arthropoda	Insecta	Hymenoptera	Ichneumonidae	Campopleginae		Campoletis	Campoletis vimmeri	(Gregor, 1938)
Arthropoda	Insecta	Hymenoptera	Ichneumonidae	Campopleginae		Campoletis	Campoletis zonata	(Gravenhorst, 1829)
Arthropoda	Insecta	Hymenoptera	Ichneumonidae	Campopleginae		Campoplex	Campoplex abbreviatus	(Brischke, 1880)
Arthropoda	Insecta	Hymenoptera	Ichneumonidae	Campopleginae		Campoplex	Campoplex alticolellae	Horstmann, 1980
Arthropoda	Insecta	Hymenoptera	Ichneumonidae	Campopleginae		Campoplex	Campoplex angustioranae	(Bauer, 1937)
Arthropoda	Insecta	Hymenoptera	Ichneumonidae	Campopleginae		Campoplex	Campoplex anomalus	Gravenhorst, 1829
Arthropoda	Insecta	Hymenoptera	Ichneumonidae	Campopleginae		Campoplex	Campoplex bilobus	(Thomson, 1887)
Arthropoda	Insecta	Hymenoptera	Ichneumonidae	Campopleginae		Campoplex	Campoplex borealis	(Zetterstedt, 1838)
Arthropoda	Insecta	Hymenoptera	Ichneumonidae	Campopleginae		Campoplex	Campoplex campoplegiformis	(Horstmann, 1973)
Arthropoda	Insecta	Hymenoptera	Ichneumonidae	Campopleginae		Campoplex	Campoplex cingulatus	(Brischke, 1880)
Arthropoda	Insecta	Hymenoptera	Ichneumonidae	Campopleginae		Campoplex	Campoplex continuus	(Thomson, 1887)
Arthropoda	Insecta	Hymenoptera	Ichneumonidae	Campopleginae		Campoplex	Campoplex coracinus	(Thomson, 1887)
Arthropoda	Insecta	Hymenoptera	Ichneumonidae	Campopleginae		Campoplex	Campoplex crassus	Horstmann, 1980
Arthropoda	Insecta	Hymenoptera	Ichneumonidae	Campopleginae		Campoplex	Campoplex cursitans	(Holmgren, 1860)
Arthropoda	Insecta	Hymenoptera	Ichneumonidae	Campopleginae		Campoplex	Campoplex deficiens	Gravenhorst, 1829
Arthropoda	Insecta	Hymenoptera	Ichneumonidae	Campopleginae		Campoplex	Campoplex difformis	(Gmelin, 1790)
Arthropoda	Insecta	Hymenoptera	Ichneumonidae	Campopleginae		Campoplex	Campoplex discrepans	(Pfankuch, 1914)
Arthropoda	Insecta	Hymenoptera	Ichneumonidae	Campopleginae		Campoplex	Campoplex dubitator	Horstmann, 1985
Arthropoda	Insecta	Hymenoptera	Ichneumonidae	Campopleginae		Campoplex	Campoplex eudoniae	Horstmann & Yu, 1999
Arthropoda	Insecta	Hymenoptera	Ichneumonidae	Campopleginae		Campoplex	Campoplex excavatus	(Brischke, 1880)
Arthropoda	Insecta	Hymenoptera	Ichneumonidae	Campopleginae		Campoplex	Campoplex faunus	Gravenhorst, 1829
Arthropoda	Insecta	Hymenoptera	Ichneumonidae	Campopleginae		Campoplex	Campoplex ferinus	(Holmgren, 1860)
Arthropoda	Insecta	Hymenoptera	Ichneumonidae	Campopleginae		Campoplex	Campoplex formosanae	Horstmann, 2012
Arthropoda	Insecta	Hymenoptera	Ichneumonidae	Campopleginae		Campoplex	Campoplex fusciplica	(Thomson, 1887)
Arthropoda	Insecta	Hymenoptera	Ichneumonidae	Campopleginae		Campoplex	Campoplex fusicornis	(Thomson, 1887)
Arthropoda	Insecta	Hymenoptera	Ichneumonidae	Campopleginae		Campoplex	Campoplex gastroides	Gravenhorst, 1829
Arthropoda	Insecta	Hymenoptera	Ichneumonidae	Campopleginae		Campoplex	Campoplex hadrocerus	(Thomson, 1887)
Arthropoda	Insecta	Hymenoptera	Ichneumonidae	Campopleginae		Campoplex	Campoplex hercynicus	Horstmann, 1985
Arthropoda	Insecta	Hymenoptera	Ichneumonidae	Campopleginae		Campoplex	Campoplex hinziator	Aubert, 1980
Arthropoda	Insecta	Hymenoptera	Ichneumonidae	Campopleginae		Campoplex	Campoplex interruptus	Horstmann, 1993
Arthropoda	Insecta	Hymenoptera	Ichneumonidae	Campopleginae		Campoplex	Campoplex investigator	(Habermehl, 1923)
Arthropoda	Insecta	Hymenoptera	Ichneumonidae	Campopleginae		Campoplex	Campoplex jaeckhi	(Bauer, 1936)
Arthropoda	Insecta	Hymenoptera	Ichneumonidae	Campopleginae		Campoplex	Campoplex lugubrinus	(Holmgren, 1860)
Arthropoda	Insecta	Hymenoptera	Ichneumonidae	Campopleginae		Campoplex	Campoplex lyratus	(Thomson, 1887)
Arthropoda	Insecta	Hymenoptera	Ichneumonidae	Campopleginae		Campoplex	Campoplex mandibularis	Horstmann, 1985
Arthropoda	Insecta	Hymenoptera	Ichneumonidae	Campopleginae		Campoplex	Campoplex melampus	(Thomson, 1887)
Arthropoda	Insecta	Hymenoptera	Ichneumonidae	Campopleginae		Campoplex	Campoplex melanostictus	Gravenhorst, 1829
Arthropoda	Insecta	Hymenoptera	Ichneumonidae	Campopleginae		Campoplex	Campoplex molestus	Gravenhorst, 1829
Arthropoda	Insecta	Hymenoptera	Ichneumonidae	Campopleginae		Campoplex	Campoplex multicinctus	Gravenhorst, 1829
Arthropoda	Insecta	Hymenoptera	Ichneumonidae	Campopleginae		Campoplex	Campoplex nigrifemur	(Szépligeti, 1916)
Arthropoda	Insecta	Hymenoptera	Ichneumonidae	Campopleginae		Campoplex	Campoplex ovatus	(Brischke, 1880)
Arthropoda	Insecta	Hymenoptera	Ichneumonidae	Campopleginae		Campoplex	Campoplex parvus	Horstmann & Yu, 1999
Arthropoda	Insecta	Hymenoptera	Ichneumonidae	Campopleginae		Campoplex	Campoplex psammae	(Morley, 1915)
Arthropoda	Insecta	Hymenoptera	Ichneumonidae	Campopleginae		Campoplex	Campoplex psilopterus	Gravenhorst, 1829
Arthropoda	Insecta	Hymenoptera	Ichneumonidae	Campopleginae		Campoplex	Campoplex puengeleri	(Schmiedeknecht, 1909)
Arthropoda	Insecta	Hymenoptera	Ichneumonidae	Campopleginae		Campoplex	Campoplex punctipleuris	Horstmann, 1980
Arthropoda	Insecta	Hymenoptera	Ichneumonidae	Campopleginae		Campoplex	Campoplex pyraustae	Smith, 1931
Arthropoda	Insecta	Hymenoptera	Ichneumonidae	Campopleginae		Campoplex	Campoplex ramidulus	(Brischke, 1880)
Arthropoda	Insecta	Hymenoptera	Ichneumonidae	Campopleginae		Campoplex	Campoplex raschkiellae	Horstmann, 1980
Arthropoda	Insecta	Hymenoptera	Ichneumonidae	Campopleginae		Campoplex	Campoplex restrictor	Aubert, 1960
Arthropoda	Insecta	Hymenoptera	Ichneumonidae	Campopleginae		Campoplex	Campoplex rothii	(Holmgren, 1860)
Arthropoda	Insecta	Hymenoptera	Ichneumonidae	Campopleginae		Campoplex	Campoplex rufipes	Gravenhorst, 1829
Arthropoda	Insecta	Hymenoptera	Ichneumonidae	Campopleginae		Campoplex	Campoplex rufocingulatus	Horstmann & Yu, 1999
Arthropoda	Insecta	Hymenoptera	Ichneumonidae	Campopleginae		Campoplex	Campoplex scaposus	(Thomson, 1887)
Arthropoda	Insecta	Hymenoptera	Ichneumonidae	Campopleginae		Campoplex	Campoplex serratellae	Horstmann, 2012
Arthropoda	Insecta	Hymenoptera	Ichneumonidae	Campopleginae		Campoplex	Campoplex striatus	Horstmann, 1985
Arthropoda	Insecta	Hymenoptera	Ichneumonidae	Campopleginae		Campoplex	Campoplex sulcatus	Horstmann, 1985
Arthropoda	Insecta	Hymenoptera	Ichneumonidae	Campopleginae		Campoplex	Campoplex tibialis	(Szépligeti, 1916)
Arthropoda	Insecta	Hymenoptera	Ichneumonidae	Campopleginae		Campoplex	Campoplex tumidulus	Gravenhorst, 1829
Arthropoda	Insecta	Hymenoptera	Ichneumonidae	Campopleginae		Campoplex	Campoplex unicingulatus	(Schmiedeknecht, 1909)
Arthropoda	Insecta	Hymenoptera	Ichneumonidae	Campopleginae		Casinaria	Casinaria albipalpis	(Gravenhorst, 1829)
Arthropoda	Insecta	Hymenoptera	Ichneumonidae	Campopleginae		Casinaria	Casinaria dubia	Tschek, 1871
Arthropoda	Insecta	Hymenoptera	Ichneumonidae	Campopleginae		Casinaria	Casinaria ischnogaster	Thomson, 1887
Arthropoda	Insecta	Hymenoptera	Ichneumonidae	Campopleginae		Casinaria	Casinaria mesozosta	(Gravenhorst, 1829)
Arthropoda	Insecta	Hymenoptera	Ichneumonidae	Campopleginae		Casinaria	Casinaria moesta	(Gravenhorst, 1829)
Arthropoda	Insecta	Hymenoptera	Ichneumonidae	Campopleginae		Casinaria	Casinaria monticola	Thomson, 1887
Arthropoda	Insecta	Hymenoptera	Ichneumonidae	Campopleginae		Casinaria	Casinaria morionella	Holmgren, 1860
Arthropoda	Insecta	Hymenoptera	Ichneumonidae	Campopleginae		Casinaria	Casinaria nigripes	(Gravenhorst, 1829)
Arthropoda	Insecta	Hymenoptera	Ichneumonidae	Campopleginae		Casinaria	Casinaria pallipes	Brischke, 1880
Arthropoda	Insecta	Hymenoptera	Ichneumonidae	Campopleginae		Casinaria	Casinaria paramorionella	Riedel, 2018
Arthropoda	Insecta	Hymenoptera	Ichneumonidae	Campopleginae		Casinaria	Casinaria petiolaris	(Gravenhorst, 1829)
Arthropoda	Insecta	Hymenoptera	Ichneumonidae	Campopleginae		Casinaria	Casinaria pyreneator	Aubert, 1960
Arthropoda	Insecta	Hymenoptera	Ichneumonidae	Campopleginae		Casinaria	Casinaria scabra	Thomson, 1887
Arthropoda	Insecta	Hymenoptera	Ichneumonidae	Campopleginae		Casinaria	Casinaria stygia	Tschek, 1871
Arthropoda	Insecta	Hymenoptera	Ichneumonidae	Campopleginae		Casinaria	Casinaria subglabra	Thomson, 1887
Arthropoda	Insecta	Hymenoptera	Ichneumonidae	Campopleginae		Casinaria	Casinaria tegulata	Riedel, 2018
Arthropoda	Insecta	Hymenoptera	Ichneumonidae	Campopleginae		Casinaria	Casinaria tenuiventris	(Gravenhorst, 1829)
Arthropoda	Insecta	Hymenoptera	Ichneumonidae	Campopleginae		Casinaria	Casinaria trochanterator	Aubert, 1960
Arthropoda	Insecta	Hymenoptera	Ichneumonidae	Campopleginae		Casinaria	Casinaria varians	Tschek, 1871
Arthropoda	Insecta	Hymenoptera	Ichneumonidae	Campopleginae		Charops	Charops cantator	(DeGeer, 1778)
Arthropoda	Insecta	Hymenoptera	Ichneumonidae	Campopleginae		Clypeoplex	Clypeoplex cerophagus	(Gravenhorst, 1829)
Arthropoda	Insecta	Hymenoptera	Ichneumonidae	Campopleginae		Cymodusa	Cymodusa ancilla	(Seyrig, 1927)
Arthropoda	Insecta	Hymenoptera	Ichneumonidae	Campopleginae		Cymodusa	Cymodusa antennator	Holmgren, 1860
Arthropoda	Insecta	Hymenoptera	Ichneumonidae	Campopleginae		Cymodusa	Cymodusa convergator	(Aubert, 1972)
Arthropoda	Insecta	Hymenoptera	Ichneumonidae	Campopleginae		Cymodusa	Cymodusa cruentata	(Gravenhorst, 1829)
Arthropoda	Insecta	Hymenoptera	Ichneumonidae	Campopleginae		Cymodusa	Cymodusa declinator	(Gravenhorst, 1829)
Arthropoda	Insecta	Hymenoptera	Ichneumonidae	Campopleginae		Cymodusa	Cymodusa exilis	Holmgren, 1860
Arthropoda	Insecta	Hymenoptera	Ichneumonidae	Campopleginae		Cymodusa	Cymodusa leucocera	Holmgren, 1859
Arthropoda	Insecta	Hymenoptera	Ichneumonidae	Campopleginae		Cymodusa	Cymodusa tibialis	Dbar, 1985
Arthropoda	Insecta	Hymenoptera	Ichneumonidae	Campopleginae		Diadegma	Diadegma aculeatum	(Bridgman, 1889)
Arthropoda	Insecta	Hymenoptera	Ichneumonidae	Campopleginae		Diadegma	Diadegma agile	(Brischke, 1880)
Arthropoda	Insecta	Hymenoptera	Ichneumonidae	Campopleginae		Diadegma	Diadegma angitiaeforma	Horstmann, 1969
Arthropoda	Insecta	Hymenoptera	Ichneumonidae	Campopleginae		Diadegma	Diadegma annulicrus	(Thomson, 1887)
Arthropoda	Insecta	Hymenoptera	Ichneumonidae	Campopleginae		Diadegma	Diadegma anurum	(Thomson, 1887)
Arthropoda	Insecta	Hymenoptera	Ichneumonidae	Campopleginae		Diadegma	Diadegma areolare	(Holmgren, 1860)
Arthropoda	Insecta	Hymenoptera	Ichneumonidae	Campopleginae		Diadegma	Diadegma armillatum	(Gravenhorst, 1829)
Arthropoda	Insecta	Hymenoptera	Ichneumonidae	Campopleginae		Diadegma	Diadegma balticum	Horstmann, 1969
Arthropoda	Insecta	Hymenoptera	Ichneumonidae	Campopleginae		Diadegma	Diadegma brevipetiolatum	Horstmann, 1969
Arthropoda	Insecta	Hymenoptera	Ichneumonidae	Campopleginae		Diadegma	Diadegma brevivalve	(Thomson, 1887)
Arthropoda	Insecta	Hymenoptera	Ichneumonidae	Campopleginae		Diadegma	Diadegma chrysostictos	(Gmelin, 1790)
Arthropoda	Insecta	Hymenoptera	Ichneumonidae	Campopleginae		Diadegma	Diadegma claripenne	(Thomson, 1887)
Arthropoda	Insecta	Hymenoptera	Ichneumonidae	Campopleginae		Diadegma	Diadegma clavicorne	(Brischke, 1880)
Arthropoda	Insecta	Hymenoptera	Ichneumonidae	Campopleginae		Diadegma	Diadegma coleophorarum	(Ratzeburg, 1852)
Arthropoda	Insecta	Hymenoptera	Ichneumonidae	Campopleginae		Diadegma	Diadegma combinatum	(Holmgren, 1860)
Arthropoda	Insecta	Hymenoptera	Ichneumonidae	Campopleginae		Diadegma	Diadegma consumtor	(Gravenhorst, 1829)
Arthropoda	Insecta	Hymenoptera	Ichneumonidae	Campopleginae		Diadegma	Diadegma contractum	(Brischke, 1880)
Arthropoda	Insecta	Hymenoptera	Ichneumonidae	Campopleginae		Diadegma	Diadegma crassicorne	(Gravenhorst, 1829)
Arthropoda	Insecta	Hymenoptera	Ichneumonidae	Campopleginae		Diadegma	Diadegma crassiseta	(Thomson, 1887)
Arthropoda	Insecta	Hymenoptera	Ichneumonidae	Campopleginae		Diadegma	Diadegma crassum	(Bridgman, 1889)
Arthropoda	Insecta	Hymenoptera	Ichneumonidae	Campopleginae		Diadegma	Diadegma duplicatum	Horstmann, 1980
Arthropoda	Insecta	Hymenoptera	Ichneumonidae	Campopleginae		Diadegma	Diadegma elishae	(Bridgman, 1884)
Arthropoda	Insecta	Hymenoptera	Ichneumonidae	Campopleginae		Diadegma	Diadegma elongatum	(Thomson, 1887)
Arthropoda	Insecta	Hymenoptera	Ichneumonidae	Campopleginae		Diadegma	Diadegma ericinellae	Horstmann, 2013
Arthropoda	Insecta	Hymenoptera	Ichneumonidae	Campopleginae		Diadegma	Diadegma erucator	(Zetterstedt, 1838)
Arthropoda	Insecta	Hymenoptera	Ichneumonidae	Campopleginae		Diadegma	Diadegma exareolator	Aubert, 1964
Arthropoda	Insecta	Hymenoptera	Ichneumonidae	Campopleginae		Diadegma	Diadegma fabricianae	Horstmann & Shaw, 1984
Arthropoda	Insecta	Hymenoptera	Ichneumonidae	Campopleginae		Diadegma	Diadegma fenestrale	(Holmgren, 1860)
Arthropoda	Insecta	Hymenoptera	Ichneumonidae	Campopleginae		Diadegma	Diadegma flavotibiale	Horstmann, 1973
Arthropoda	Insecta	Hymenoptera	Ichneumonidae	Campopleginae		Diadegma	Diadegma flexum	Horstmann, 1973
Arthropoda	Insecta	Hymenoptera	Ichneumonidae	Campopleginae		Diadegma	Diadegma gibbulum	(Brischke, 1880)
Arthropoda	Insecta	Hymenoptera	Ichneumonidae	Campopleginae		Diadegma	Diadegma glabriculum	(Holmgren, 1859)
Arthropoda	Insecta	Hymenoptera	Ichneumonidae	Campopleginae		Diadegma	Diadegma gracile	(Gravenhorst, 1829)
Arthropoda	Insecta	Hymenoptera	Ichneumonidae	Campopleginae		Diadegma	Diadegma grisescens	(Gravenhorst, 1829)
Arthropoda	Insecta	Hymenoptera	Ichneumonidae	Campopleginae		Diadegma	Diadegma holopygum	(Thomson, 1887)
Arthropoda	Insecta	Hymenoptera	Ichneumonidae	Campopleginae		Diadegma	Diadegma hygrobium	(Thomson, 1887)
Arthropoda	Insecta	Hymenoptera	Ichneumonidae	Campopleginae		Diadegma	Diadegma incompletum	Horstmann, 1973
Arthropoda	Insecta	Hymenoptera	Ichneumonidae	Campopleginae		Diadegma	Diadegma insectator	(Schrank, 1781)
Arthropoda	Insecta	Hymenoptera	Ichneumonidae	Campopleginae		Diadegma	Diadegma kyffhusanae	Horstmann, 1973
Arthropoda	Insecta	Hymenoptera	Ichneumonidae	Campopleginae		Diadegma	Diadegma laricinellum	(Strobl, 1904)
Arthropoda	Insecta	Hymenoptera	Ichneumonidae	Campopleginae		Diadegma	Diadegma laterale	(Gravenhorst, 1829)
Arthropoda	Insecta	Hymenoptera	Ichneumonidae	Campopleginae		Diadegma	Diadegma latungula	(Thomson, 1887)
Arthropoda	Insecta	Hymenoptera	Ichneumonidae	Campopleginae		Diadegma	Diadegma ledicola	Horstmann, 1969
Arthropoda	Insecta	Hymenoptera	Ichneumonidae	Campopleginae		Diadegma	Diadegma lithocolletis	Horstmann, 1969
Arthropoda	Insecta	Hymenoptera	Ichneumonidae	Campopleginae		Diadegma	Diadegma litorale	(Holmgren, 1856)
Arthropoda	Insecta	Hymenoptera	Ichneumonidae	Campopleginae		Diadegma	Diadegma longicaudatum	Horstmann, 1969
Arthropoda	Insecta	Hymenoptera	Ichneumonidae	Campopleginae		Diadegma	Diadegma majale	(Gravenhorst, 1829)
Arthropoda	Insecta	Hymenoptera	Ichneumonidae	Campopleginae		Diadegma	Diadegma melanium	(Thomson, 1887)
Arthropoda	Insecta	Hymenoptera	Ichneumonidae	Campopleginae		Diadegma	Diadegma meliloti	Horstmann, 1973
Arthropoda	Insecta	Hymenoptera	Ichneumonidae	Campopleginae		Diadegma	Diadegma micrurum	(Thomson, 1887)
Arthropoda	Insecta	Hymenoptera	Ichneumonidae	Campopleginae		Diadegma	Diadegma nanus	(Gravenhorst, 1829)
Arthropoda	Insecta	Hymenoptera	Ichneumonidae	Campopleginae		Diadegma	Diadegma naryciae	Horstmann, 2008
Arthropoda	Insecta	Hymenoptera	Ichneumonidae	Campopleginae		Diadegma	Diadegma neocerophagum	Horstmann, 1969
Arthropoda	Insecta	Hymenoptera	Ichneumonidae	Campopleginae		Diadegma	Diadegma neomajale	Horstmann, 1969
Arthropoda	Insecta	Hymenoptera	Ichneumonidae	Campopleginae		Diadegma	Diadegma nervosae	Horstmann, 1969
Arthropoda	Insecta	Hymenoptera	Ichneumonidae	Campopleginae		Diadegma	Diadegma nigrostigmaticum	Horstmann, 1969
Arthropoda	Insecta	Hymenoptera	Ichneumonidae	Campopleginae		Diadegma	Diadegma occultum	(Brischke, 1880)
Arthropoda	Insecta	Hymenoptera	Ichneumonidae	Campopleginae		Diadegma	Diadegma paludis	Horstmann, 1969
Arthropoda	Insecta	Hymenoptera	Ichneumonidae	Campopleginae		Diadegma	Diadegma pusio	(Holmgren, 1860)
Arthropoda	Insecta	Hymenoptera	Ichneumonidae	Campopleginae		Diadegma	Diadegma rufatum	(Bridgman, 1884)
Arthropoda	Insecta	Hymenoptera	Ichneumonidae	Campopleginae		Diadegma	Diadegma ruficeps	(Holmgren, 1860)
Arthropoda	Insecta	Hymenoptera	Ichneumonidae	Campopleginae		Diadegma	Diadegma rufigaster	Horstmann, 1973
Arthropoda	Insecta	Hymenoptera	Ichneumonidae	Campopleginae		Diadegma	Diadegma salicis	Horstmann, 1973
Arthropoda	Insecta	Hymenoptera	Ichneumonidae	Campopleginae		Diadegma	Diadegma semiclausum	(Hellén, 1949)
Arthropoda	Insecta	Hymenoptera	Ichneumonidae	Campopleginae		Diadegma	Diadegma sordipes	(Thomson, 1887)
Arthropoda	Insecta	Hymenoptera	Ichneumonidae	Campopleginae		Diadegma	Diadegma speculare	(Thomson, 1887)
Arthropoda	Insecta	Hymenoptera	Ichneumonidae	Campopleginae		Diadegma	Diadegma stagnale	(Holmgren, 1856)
Arthropoda	Insecta	Hymenoptera	Ichneumonidae	Campopleginae		Diadegma	Diadegma stigmatellae	Horstmann, 1980
Arthropoda	Insecta	Hymenoptera	Ichneumonidae	Campopleginae		Diadegma	Diadegma tenuipes	(Thomson, 1887)
Arthropoda	Insecta	Hymenoptera	Ichneumonidae	Campopleginae		Diadegma	Diadegma tripunctatum	(Bridgman, 1886)
Arthropoda	Insecta	Hymenoptera	Ichneumonidae	Campopleginae		Diadegma	Diadegma trochanteratum	(Thomson, 1887)
Arthropoda	Insecta	Hymenoptera	Ichneumonidae	Campopleginae		Diadegma	Diadegma truncatum	(Thomson, 1887)
Arthropoda	Insecta	Hymenoptera	Ichneumonidae	Campopleginae		Diadegma	Diadegma velox	(Holmgren, 1860)
Arthropoda	Insecta	Hymenoptera	Ichneumonidae	Campopleginae		Dolophron	Dolophron nemorati	Horstmann, 1978
Arthropoda	Insecta	Hymenoptera	Ichneumonidae	Campopleginae		Dolophron	Dolophron pedella	(Holmgren, 1860)
Arthropoda	Insecta	Hymenoptera	Ichneumonidae	Campopleginae		Dusona	Dusona admontina	(Speiser, 1908)
Arthropoda	Insecta	Hymenoptera	Ichneumonidae	Campopleginae		Dusona	Dusona aemula	(Förster, 1868)
Arthropoda	Insecta	Hymenoptera	Ichneumonidae	Campopleginae		Dusona	Dusona alpigena	Hinz, 1972
Arthropoda	Insecta	Hymenoptera	Ichneumonidae	Campopleginae		Dusona	Dusona alpina	(Strobl, 1904)
Arthropoda	Insecta	Hymenoptera	Ichneumonidae	Campopleginae		Dusona	Dusona alticola	(Gravenhorst, 1829)
Arthropoda	Insecta	Hymenoptera	Ichneumonidae	Campopleginae		Dusona	Dusona anceps	(Holmgren, 1860)
Arthropoda	Insecta	Hymenoptera	Ichneumonidae	Campopleginae		Dusona	Dusona angustata	(Thomson, 1887)
Arthropoda	Insecta	Hymenoptera	Ichneumonidae	Campopleginae		Dusona	Dusona angustifrons	(Förster, 1868)
Arthropoda	Insecta	Hymenoptera	Ichneumonidae	Campopleginae		Dusona	Dusona annexa	(Förster, 1868)
Arthropoda	Insecta	Hymenoptera	Ichneumonidae	Campopleginae		Dusona	Dusona aurita	(Kriechbaumer, 1883)
Arthropoda	Insecta	Hymenoptera	Ichneumonidae	Campopleginae		Dusona	Dusona aversa	(Förster, 1868)
Arthropoda	Insecta	Hymenoptera	Ichneumonidae	Campopleginae		Dusona	Dusona baueri	Hinz, 1973
Arthropoda	Insecta	Hymenoptera	Ichneumonidae	Campopleginae		Dusona	Dusona bellipes	(Holmgren, 1872)
Arthropoda	Insecta	Hymenoptera	Ichneumonidae	Campopleginae		Dusona	Dusona bicoloripes	(Ashmead, 1906)
Arthropoda	Insecta	Hymenoptera	Ichneumonidae	Campopleginae		Dusona	Dusona blanda	(Förster, 1868)
Arthropoda	Insecta	Hymenoptera	Ichneumonidae	Campopleginae		Dusona	Dusona bucculenta	(Holmgren, 1860)
Arthropoda	Insecta	Hymenoptera	Ichneumonidae	Campopleginae		Dusona	Dusona carinifrons	(Holmgren, 1860)
Arthropoda	Insecta	Hymenoptera	Ichneumonidae	Campopleginae		Dusona	Dusona carpathica	(Szépligeti, 1916)
Arthropoda	Insecta	Hymenoptera	Ichneumonidae	Campopleginae		Dusona	Dusona circumcinctus	(Förster, 1868)
Arthropoda	Insecta	Hymenoptera	Ichneumonidae	Campopleginae		Dusona	Dusona circumspectans	(Förster, 1868)
Arthropoda	Insecta	Hymenoptera	Ichneumonidae	Campopleginae		Dusona	Dusona confusa	(Förster, 1868)
Arthropoda	Insecta	Hymenoptera	Ichneumonidae	Campopleginae		Dusona	Dusona cultrator	(Gravenhorst, 1829)
Arthropoda	Insecta	Hymenoptera	Ichneumonidae	Campopleginae		Dusona	Dusona disclusa	(Förster, 1868)
Arthropoda	Insecta	Hymenoptera	Ichneumonidae	Campopleginae		Dusona	Dusona dubitor	Hinz, 1977
Arthropoda	Insecta	Hymenoptera	Ichneumonidae	Campopleginae		Dusona	Dusona einbecki	Hinz, 1977
Arthropoda	Insecta	Hymenoptera	Ichneumonidae	Campopleginae		Dusona	Dusona erythrogaster	(Förster, 1868)
Arthropoda	Insecta	Hymenoptera	Ichneumonidae	Campopleginae		Dusona	Dusona falcator	(Fabricius, 1775)
Arthropoda	Insecta	Hymenoptera	Ichneumonidae	Campopleginae		Dusona	Dusona flagellator	(Fabricius, 1793)
Arthropoda	Insecta	Hymenoptera	Ichneumonidae	Campopleginae		Dusona	Dusona fundator	(Hinz, 1990)
Arthropoda	Insecta	Hymenoptera	Ichneumonidae	Campopleginae		Dusona	Dusona genalis	(Thomson, 1887)
Arthropoda	Insecta	Hymenoptera	Ichneumonidae	Campopleginae		Dusona	Dusona habermehli	(Kriechbaumer, 1898)
Arthropoda	Insecta	Hymenoptera	Ichneumonidae	Campopleginae		Dusona	Dusona hastulatae	Horstmann, 2009
Arthropoda	Insecta	Hymenoptera	Ichneumonidae	Campopleginae		Dusona	Dusona humilis	(Förster, 1868)
Arthropoda	Insecta	Hymenoptera	Ichneumonidae	Campopleginae		Dusona	Dusona incompleta	(Bridgman, 1889)
Arthropoda	Insecta	Hymenoptera	Ichneumonidae	Campopleginae		Dusona	Dusona inermis	(Förster, 1868)
Arthropoda	Insecta	Hymenoptera	Ichneumonidae	Campopleginae		Dusona	Dusona infesta	(Förster, 1868)
Arthropoda	Insecta	Hymenoptera	Ichneumonidae	Campopleginae		Dusona	Dusona insignita	(Förster, 1868)
Arthropoda	Insecta	Hymenoptera	Ichneumonidae	Campopleginae		Dusona	Dusona juvenilis	(Förster, 1868)
Arthropoda	Insecta	Hymenoptera	Ichneumonidae	Campopleginae		Dusona	Dusona leptogaster	(Holmgren, 1860)
Arthropoda	Insecta	Hymenoptera	Ichneumonidae	Campopleginae		Dusona	Dusona libertatis	(Teunissen, 1947)
Arthropoda	Insecta	Hymenoptera	Ichneumonidae	Campopleginae		Dusona	Dusona limnobia	(Thomson, 1887)
Arthropoda	Insecta	Hymenoptera	Ichneumonidae	Campopleginae		Dusona	Dusona mactator	(Förster, 1868)
Arthropoda	Insecta	Hymenoptera	Ichneumonidae	Campopleginae		Dusona	Dusona mercator	(Fabricius, 1793)
Arthropoda	Insecta	Hymenoptera	Ichneumonidae	Campopleginae		Dusona	Dusona meridionator	Aubert, 1960
Arthropoda	Insecta	Hymenoptera	Ichneumonidae	Campopleginae		Dusona	Dusona montana	(Roman, 1929)
Arthropoda	Insecta	Hymenoptera	Ichneumonidae	Campopleginae		Dusona	Dusona myrtilla	(Desvignes, 1856)
Arthropoda	Insecta	Hymenoptera	Ichneumonidae	Campopleginae		Dusona	Dusona nebulosa	Horstmann, 2004
Arthropoda	Insecta	Hymenoptera	Ichneumonidae	Campopleginae		Dusona	Dusona nidulator	(Fabricius, 1804)
Arthropoda	Insecta	Hymenoptera	Ichneumonidae	Campopleginae		Dusona	Dusona notabilis	(Förster, 1868)
Arthropoda	Insecta	Hymenoptera	Ichneumonidae	Campopleginae		Dusona	Dusona obliterata	(Holmgren, 1872)
Arthropoda	Insecta	Hymenoptera	Ichneumonidae	Campopleginae		Dusona	Dusona opaca	(Thomson, 1887)
Arthropoda	Insecta	Hymenoptera	Ichneumonidae	Campopleginae		Dusona	Dusona perditor	(Förster, 1868)
Arthropoda	Insecta	Hymenoptera	Ichneumonidae	Campopleginae		Dusona	Dusona petiolator	(Fabricius, 1804)
Arthropoda	Insecta	Hymenoptera	Ichneumonidae	Campopleginae		Dusona	Dusona pulchripes	(Holmgren, 1872)
Arthropoda	Insecta	Hymenoptera	Ichneumonidae	Campopleginae		Dusona	Dusona pineticola	(Holmgren, 1872)
Arthropoda	Insecta	Hymenoptera	Ichneumonidae	Campopleginae		Dusona	Dusona polita	(Förster, 1868)
Arthropoda	Insecta	Hymenoptera	Ichneumonidae	Campopleginae		Dusona	Dusona prominula	(Förster, 1868)
Arthropoda	Insecta	Hymenoptera	Ichneumonidae	Campopleginae		Dusona	Dusona pugillator	(Linnaeus, 1758)
Arthropoda	Insecta	Hymenoptera	Ichneumonidae	Campopleginae		Dusona	Dusona recta	(Thomson, 1887)
Arthropoda	Insecta	Hymenoptera	Ichneumonidae	Campopleginae		Dusona	Dusona rubidatae	Horstmann, 2009
Arthropoda	Insecta	Hymenoptera	Ichneumonidae	Campopleginae		Dusona	Dusona rugifer	(Förster, 1868)
Arthropoda	Insecta	Hymenoptera	Ichneumonidae	Campopleginae		Dusona	Dusona rugulosa	(Förster, 1868)
Arthropoda	Insecta	Hymenoptera	Ichneumonidae	Campopleginae		Dusona	Dusona semiflava	(Costa, 1883)
Arthropoda	Insecta	Hymenoptera	Ichneumonidae	Campopleginae		Dusona	Dusona signator	(Brauns, 1895)
Arthropoda	Insecta	Hymenoptera	Ichneumonidae	Campopleginae		Dusona	Dusona sobolicida	(Förster, 1868)
Arthropoda	Insecta	Hymenoptera	Ichneumonidae	Campopleginae		Dusona	Dusona spinipes	(Thomson, 1887)
Arthropoda	Insecta	Hymenoptera	Ichneumonidae	Campopleginae		Dusona	Dusona stenogaster	(Förster, 1868)
Arthropoda	Insecta	Hymenoptera	Ichneumonidae	Campopleginae		Dusona	Dusona stragifex	(Förster, 1868)
Arthropoda	Insecta	Hymenoptera	Ichneumonidae	Campopleginae		Dusona	Dusona stygia	(Förster, 1868)
Arthropoda	Insecta	Hymenoptera	Ichneumonidae	Campopleginae		Dusona	Dusona subimpressa	(Förster, 1868)
Arthropoda	Insecta	Hymenoptera	Ichneumonidae	Campopleginae		Dusona	Dusona tenuis	(Förster, 1868)
Arthropoda	Insecta	Hymenoptera	Ichneumonidae	Campopleginae		Dusona	Dusona terebrator	(Förster, 1868)
Arthropoda	Insecta	Hymenoptera	Ichneumonidae	Campopleginae		Dusona	Dusona thomsoni	Hinz, 1963
Arthropoda	Insecta	Hymenoptera	Ichneumonidae	Campopleginae		Dusona	Dusona variator	(Hinz, 1990)
Arthropoda	Insecta	Hymenoptera	Ichneumonidae	Campopleginae		Dusona	Dusona vidua	(Gravenhorst, 1829)
Arthropoda	Insecta	Hymenoptera	Ichneumonidae	Campopleginae		Dusona	Dusona vigilator	(Förster, 1868)
Arthropoda	Insecta	Hymenoptera	Ichneumonidae	Campopleginae		Dusona	Dusona xenocampta	(Förster, 1868)
Arthropoda	Insecta	Hymenoptera	Ichneumonidae	Campopleginae		Echthronomas	Echthronomas ochrostoma	(Holmgren, 1860)
Arthropoda	Insecta	Hymenoptera	Ichneumonidae	Campopleginae		Echthronomas	Echthronomas quadrinotata	(Thomson, 1887)
Arthropoda	Insecta	Hymenoptera	Ichneumonidae	Campopleginae		Enytus	Enytus apostatus	(Gravenhorst, 1829)
Arthropoda	Insecta	Hymenoptera	Ichneumonidae	Campopleginae		Enytus	Enytus appositor	(Aubert, 1970)
Arthropoda	Insecta	Hymenoptera	Ichneumonidae	Campopleginae		Enytus	Enytus crataegellae	(Thomson, 1887)
Arthropoda	Insecta	Hymenoptera	Ichneumonidae	Campopleginae		Enytus	Enytus neoapostata	(Horstmann, 1969)
Arthropoda	Insecta	Hymenoptera	Ichneumonidae	Campopleginae		Enytus	Enytus parvicanda	(Thomson, 1887)
Arthropoda	Insecta	Hymenoptera	Ichneumonidae	Campopleginae		Enytus	Enytus rufoapicalis	Horstmann, 2004
Arthropoda	Insecta	Hymenoptera	Ichneumonidae	Campopleginae		Eriborus	Eriborus braccatus	(Gmelin, 1790)
Arthropoda	Insecta	Hymenoptera	Ichneumonidae	Campopleginae		Eriborus	Eriborus dorsalis	(Gravenhorst, 1829)
Arthropoda	Insecta	Hymenoptera	Ichneumonidae	Campopleginae		Eriborus	Eriborus obscuripes	Horstmann, 1987
Arthropoda	Insecta	Hymenoptera	Ichneumonidae	Campopleginae		Eriborus	Eriborus obscurus	Horstmann, 1987
Arthropoda	Insecta	Hymenoptera	Ichneumonidae	Campopleginae		Eriborus	Eriborus perfidus	(Gravenhorst, 1829)
Arthropoda	Insecta	Hymenoptera	Ichneumonidae	Campopleginae		Eriborus	Eriborus rufopictus	Horstmann, 1987
Arthropoda	Insecta	Hymenoptera	Ichneumonidae	Campopleginae		Gonotypus	Gonotypus melanostoma	(Thomson, 1887)
Arthropoda	Insecta	Hymenoptera	Ichneumonidae	Campopleginae		Hyposoter	Hyposoter albicans	(Brischke, 1880)
Arthropoda	Insecta	Hymenoptera	Ichneumonidae	Campopleginae		Hyposoter	Hyposoter albonotatus	(Bridgman, 1889)
Arthropoda	Insecta	Hymenoptera	Ichneumonidae	Campopleginae		Hyposoter	Hyposoter alienus	(Brischke, 1880)
Arthropoda	Insecta	Hymenoptera	Ichneumonidae	Campopleginae		Hyposoter	Hyposoter anglicanus	(Habermehl, 1923)
Arthropoda	Insecta	Hymenoptera	Ichneumonidae	Campopleginae		Hyposoter	Hyposoter barrettii	(Bridgman, 1881)
Arthropoda	Insecta	Hymenoptera	Ichneumonidae	Campopleginae		Hyposoter	Hyposoter boops	(Thomson, 1887)
Arthropoda	Insecta	Hymenoptera	Ichneumonidae	Campopleginae		Hyposoter	Hyposoter brischkei	(Bridgman, 1882)
Arthropoda	Insecta	Hymenoptera	Ichneumonidae	Campopleginae		Hyposoter	Hyposoter caedator	(Gravenhorst, 1829)
Arthropoda	Insecta	Hymenoptera	Ichneumonidae	Campopleginae		Hyposoter	Hyposoter carbonarius	(Ratzeburg, 1844)
Arthropoda	Insecta	Hymenoptera	Ichneumonidae	Campopleginae		Hyposoter	Hyposoter caudator	Horstmann, 2008
Arthropoda	Insecta	Hymenoptera	Ichneumonidae	Campopleginae		Hyposoter	Hyposoter clausus	(Brischke, 1880)
Arthropoda	Insecta	Hymenoptera	Ichneumonidae	Campopleginae		Hyposoter	Hyposoter coxator	(Thomson, 1887)
Arthropoda	Insecta	Hymenoptera	Ichneumonidae	Campopleginae		Hyposoter	Hyposoter didymator	(Thunberg, 1824)
Arthropoda	Insecta	Hymenoptera	Ichneumonidae	Campopleginae		Hyposoter	Hyposoter discedens	(Schmiedeknecht, 1909)
Arthropoda	Insecta	Hymenoptera	Ichneumonidae	Campopleginae		Hyposoter	Hyposoter dolosus	(Gravenhorst, 1829)
Arthropoda	Insecta	Hymenoptera	Ichneumonidae	Campopleginae		Hyposoter	Hyposoter ebeninus	(Gravenhorst, 1829)
Arthropoda	Insecta	Hymenoptera	Ichneumonidae	Campopleginae		Hyposoter	Hyposoter fitchii	(Bridgman, 1881)
Arthropoda	Insecta	Hymenoptera	Ichneumonidae	Campopleginae		Hyposoter	Hyposoter horticola	(Gravenhorst, 1829)
Arthropoda	Insecta	Hymenoptera	Ichneumonidae	Campopleginae		Hyposoter	Hyposoter inquinatus	(Holmgren, 1860)
Arthropoda	Insecta	Hymenoptera	Ichneumonidae	Campopleginae		Hyposoter	Hyposoter leucomerus	(Thomson, 1887)
Arthropoda	Insecta	Hymenoptera	Ichneumonidae	Campopleginae		Hyposoter	Hyposoter longulus	(Thomson, 1887)
Arthropoda	Insecta	Hymenoptera	Ichneumonidae	Campopleginae		Hyposoter	Hyposoter neglectus	(Holmgren, 1860)
Arthropoda	Insecta	Hymenoptera	Ichneumonidae	Campopleginae		Hyposoter	Hyposoter notatus	(Gravenhorst, 1829)
Arthropoda	Insecta	Hymenoptera	Ichneumonidae	Campopleginae		Hyposoter	Hyposoter obscurellus	(Holmgren, 1860)
Arthropoda	Insecta	Hymenoptera	Ichneumonidae	Campopleginae		Hyposoter	Hyposoter orbator	(Gravenhorst, 1829)
Arthropoda	Insecta	Hymenoptera	Ichneumonidae	Campopleginae		Hyposoter	Hyposoter pallidirostris	(Schmiedeknecht, 1909)
Arthropoda	Insecta	Hymenoptera	Ichneumonidae	Campopleginae		Hyposoter	Hyposoter placidus	(Desvignes, 1856)
Arthropoda	Insecta	Hymenoptera	Ichneumonidae	Campopleginae		Hyposoter	Hyposoter rapacitor	Aubert, 1971
Arthropoda	Insecta	Hymenoptera	Ichneumonidae	Campopleginae		Hyposoter	Hyposoter rhodocerae	(Rondani, 1877)
Arthropoda	Insecta	Hymenoptera	Ichneumonidae	Campopleginae		Hyposoter	Hyposoter ruficrus	(Thomson, 1887)
Arthropoda	Insecta	Hymenoptera	Ichneumonidae	Campopleginae		Hyposoter	Hyposoter rufovariatus	(Schmiedeknecht, 1909)
Arthropoda	Insecta	Hymenoptera	Ichneumonidae	Campopleginae		Hyposoter	Hyposoter seniculus	(Gravenhorst, 1829)
Arthropoda	Insecta	Hymenoptera	Ichneumonidae	Campopleginae		Hyposoter	Hyposoter sicarius	(Gravenhorst, 1829)
Arthropoda	Insecta	Hymenoptera	Ichneumonidae	Campopleginae		Hyposoter	Hyposoter singularis	(Schmiedeknecht, 1909)
Arthropoda	Insecta	Hymenoptera	Ichneumonidae	Campopleginae		Hyposoter	Hyposoter thuringiacus	(Schmiedeknecht, 1909)
Arthropoda	Insecta	Hymenoptera	Ichneumonidae	Campopleginae		Hyposoter	Hyposoter tricolor	(Ratzeburg, 1844)
Arthropoda	Insecta	Hymenoptera	Ichneumonidae	Campopleginae		Hyposoter	Hyposoter tricoloripes	(Viereck, 1911)
Arthropoda	Insecta	Hymenoptera	Ichneumonidae	Campopleginae		Hyposoter	Hyposoter validus	(Pfankuch, 1921)
Arthropoda	Insecta	Hymenoptera	Ichneumonidae	Campopleginae		Hyposoter	Hyposoter virginalis	(Gravenhorst, 1829)
Arthropoda	Insecta	Hymenoptera	Ichneumonidae	Campopleginae		Hyposoter	Hyposoter vividus	(Holmgren, 1860)
Arthropoda	Insecta	Hymenoptera	Ichneumonidae	Campopleginae		Lathroplex	Lathroplex clypearis	Thomson, 1887
Arthropoda	Insecta	Hymenoptera	Ichneumonidae	Campopleginae		Lathrostizus	Lathrostizus clypeatus	(Brischke, 1880)
Arthropoda	Insecta	Hymenoptera	Ichneumonidae	Campopleginae		Lathrostizus	Lathrostizus curvicauda	(Holmgren, 1860)
Arthropoda	Insecta	Hymenoptera	Ichneumonidae	Campopleginae		Lathrostizus	Lathrostizus forticanda	(Thomson, 1887)
Arthropoda	Insecta	Hymenoptera	Ichneumonidae	Campopleginae		Lathrostizus	Lathrostizus lugens	(Gravenhorst, 1829)
Arthropoda	Insecta	Hymenoptera	Ichneumonidae	Campopleginae		Lathrostizus	Lathrostizus macrostoma	(Thomson, 1887)
Arthropoda	Insecta	Hymenoptera	Ichneumonidae	Campopleginae		Lathrostizus	Lathrostizus punctipes	(Thomson, 1887)
Arthropoda	Insecta	Hymenoptera	Ichneumonidae	Campopleginae		Lemophagus	Lemophagus curtus	Townes, 1965
Arthropoda	Insecta	Hymenoptera	Ichneumonidae	Campopleginae		Lemophagus	Lemophagus errabundus	(Gravenhorst, 1829)
Arthropoda	Insecta	Hymenoptera	Ichneumonidae	Campopleginae		Lemophagus	Lemophagus pulcher	(Szépligeti, 1916)
Arthropoda	Insecta	Hymenoptera	Ichneumonidae	Campopleginae		Leptocampoplex	Leptocampoplex cremastoides	(Holmgren, 1860)
Arthropoda	Insecta	Hymenoptera	Ichneumonidae	Campopleginae		Macrus	Macrus parvulus	(Gravenhorst, 1829)
Arthropoda	Insecta	Hymenoptera	Ichneumonidae	Campopleginae		Melanoplex	Melanoplex bucculentus	(Holmgren, 1860)
Arthropoda	Insecta	Hymenoptera	Ichneumonidae	Campopleginae		Meloboris	Meloboris alternans	(Gravenhorst, 1829)
Arthropoda	Insecta	Hymenoptera	Ichneumonidae	Campopleginae		Meloboris	Meloboris collector	(Thunberg, 1824)
Arthropoda	Insecta	Hymenoptera	Ichneumonidae	Campopleginae		Meloboris	Meloboris dimicatellae	Horstmann, 2004
Arthropoda	Insecta	Hymenoptera	Ichneumonidae	Campopleginae		Meloboris	Meloboris proxima	(Perkins, 1942)
Arthropoda	Insecta	Hymenoptera	Ichneumonidae	Campopleginae		Nemeritis	Nemeritis aequalis	Horstmann, 1973
Arthropoda	Insecta	Hymenoptera	Ichneumonidae	Campopleginae		Nemeritis	Nemeritis brevicauda	Horstmann, 1975
Arthropoda	Insecta	Hymenoptera	Ichneumonidae	Campopleginae		Nemeritis	Nemeritis caudatula	Thomson, 1887
Arthropoda	Insecta	Hymenoptera	Ichneumonidae	Campopleginae		Nemeritis	Nemeritis elegans	(Szépligeti, 1901)
Arthropoda	Insecta	Hymenoptera	Ichneumonidae	Campopleginae		Nemeritis	Nemeritis fallax	(Gravenhorst, 1829)
Arthropoda	Insecta	Hymenoptera	Ichneumonidae	Campopleginae		Nemeritis	Nemeritis lativentris	Thomson, 1887
Arthropoda	Insecta	Hymenoptera	Ichneumonidae	Campopleginae		Nemeritis	Nemeritis lissonotoides	Schmiedeknecht, 1909
Arthropoda	Insecta	Hymenoptera	Ichneumonidae	Campopleginae		Nemeritis	Nemeritis macrocentra	(Gravenhorst, 1829)
Arthropoda	Insecta	Hymenoptera	Ichneumonidae	Campopleginae		Nemeritis	Nemeritis obscuripes	Horstmann, 1975
Arthropoda	Insecta	Hymenoptera	Ichneumonidae	Campopleginae		Nemeritis	Nemeritis pygmaea	Horstmann, 1993
Arthropoda	Insecta	Hymenoptera	Ichneumonidae	Campopleginae		Nemeritis	Nemeritis quercicola	Horstmann, 1980
Arthropoda	Insecta	Hymenoptera	Ichneumonidae	Campopleginae		Nemeritis	Nemeritis scaposa	Horstmann, 1975
Arthropoda	Insecta	Hymenoptera	Ichneumonidae	Campopleginae		Nemeritis	Nemeritis silvicola	Horstmann, 1973
Arthropoda	Insecta	Hymenoptera	Ichneumonidae	Campopleginae		Nemeritis	Nemeritis specularis	Horstmann, 1975
Arthropoda	Insecta	Hymenoptera	Ichneumonidae	Campopleginae		Nemeritis	Nemeritis stenura	Thomson, 1887
Arthropoda	Insecta	Hymenoptera	Ichneumonidae	Campopleginae		Nepiesta	Nepiesta mandibularis	(Holmgren, 1860)
Arthropoda	Insecta	Hymenoptera	Ichneumonidae	Campopleginae		Nepiesta	Nepiesta robusta	Schmiedeknecht, 1909
Arthropoda	Insecta	Hymenoptera	Ichneumonidae	Campopleginae		Nepiesta	Nepiesta rufocincta	Strobl, 1904
Arthropoda	Insecta	Hymenoptera	Ichneumonidae	Campopleginae		Nepiesta	Nepiesta subclavata	Thomson, 1887
Arthropoda	Insecta	Hymenoptera	Ichneumonidae	Campopleginae		Nepiesta	Nepiesta tarsalis	(Szépligeti, 1911)
Arthropoda	Insecta	Hymenoptera	Ichneumonidae	Campopleginae		Nepiesta	Nepiesta tricingulata	Horstmann, 1973
Arthropoda	Insecta	Hymenoptera	Ichneumonidae	Campopleginae		Olesicampe	Olesicampe alboplica	(Thomson, 1887)
Arthropoda	Insecta	Hymenoptera	Ichneumonidae	Campopleginae		Olesicampe	Olesicampe annulitarsis	(Thomson, 1887)
Arthropoda	Insecta	Hymenoptera	Ichneumonidae	Campopleginae		Olesicampe	Olesicampe argentata	(Gravenhorst, 1829)
Arthropoda	Insecta	Hymenoptera	Ichneumonidae	Campopleginae		Olesicampe	Olesicampe auctor	(Gravenhorst, 1829)
Arthropoda	Insecta	Hymenoptera	Ichneumonidae	Campopleginae		Olesicampe	Olesicampe binotata	(Thomson, 1887)
Arthropoda	Insecta	Hymenoptera	Ichneumonidae	Campopleginae		Olesicampe	Olesicampe buccata	(Thomson, 1887)
Arthropoda	Insecta	Hymenoptera	Ichneumonidae	Campopleginae		Olesicampe	Olesicampe canaliculata	(Gravenhorst, 1829)
Arthropoda	Insecta	Hymenoptera	Ichneumonidae	Campopleginae		Olesicampe	Olesicampe cavigena	(Thomson, 1887)
Arthropoda	Insecta	Hymenoptera	Ichneumonidae	Campopleginae		Olesicampe	Olesicampe clandestina	(Holmgren, 1860)
Arthropoda	Insecta	Hymenoptera	Ichneumonidae	Campopleginae		Olesicampe	Olesicampe confinis	(Holmgren, 1858)
Arthropoda	Insecta	Hymenoptera	Ichneumonidae	Campopleginae		Olesicampe	Olesicampe crassitarsis	(Thomson, 1887)
Arthropoda	Insecta	Hymenoptera	Ichneumonidae	Campopleginae		Olesicampe	Olesicampe curtigena	(Thomson, 1887)
Arthropoda	Insecta	Hymenoptera	Ichneumonidae	Campopleginae		Olesicampe	Olesicampe errans	(Holmgren, 1860)
Arthropoda	Insecta	Hymenoptera	Ichneumonidae	Campopleginae		Olesicampe	Olesicampe erythropyga	(Holmgren, 1860)
Arthropoda	Insecta	Hymenoptera	Ichneumonidae	Campopleginae		Olesicampe	Olesicampe femorella	(Thomson, 1887)
Arthropoda	Insecta	Hymenoptera	Ichneumonidae	Campopleginae		Olesicampe	Olesicampe flavicornis	(Thomson, 1887)
Arthropoda	Insecta	Hymenoptera	Ichneumonidae	Campopleginae		Olesicampe	Olesicampe forticostata	(Schmiedeknecht, 1909)
Arthropoda	Insecta	Hymenoptera	Ichneumonidae	Campopleginae		Olesicampe	Olesicampe fulcrans	(Thomson, 1887)
Arthropoda	Insecta	Hymenoptera	Ichneumonidae	Campopleginae		Olesicampe	Olesicampe fulviventris	(Gmelin, 1790)
Arthropoda	Insecta	Hymenoptera	Ichneumonidae	Campopleginae		Olesicampe	Olesicampe genalis	Horstmann & Yu, 1999
Arthropoda	Insecta	Hymenoptera	Ichneumonidae	Campopleginae		Olesicampe	Olesicampe geniculella	(Thomson, 1887)
Arthropoda	Insecta	Hymenoptera	Ichneumonidae	Campopleginae		Olesicampe	Olesicampe gracilipes	(Thomson, 1887)
Arthropoda	Insecta	Hymenoptera	Ichneumonidae	Campopleginae		Olesicampe	Olesicampe heterogaster	(Thomson, 1887)
Arthropoda	Insecta	Hymenoptera	Ichneumonidae	Campopleginae		Olesicampe	Olesicampe longipes	(Müller, 1776)
Arthropoda	Insecta	Hymenoptera	Ichneumonidae	Campopleginae		Olesicampe	Olesicampe macellator	(Thunberg, 1824)
Arthropoda	Insecta	Hymenoptera	Ichneumonidae	Campopleginae		Olesicampe	Olesicampe melanogaster	(Thomson, 1887)
Arthropoda	Insecta	Hymenoptera	Ichneumonidae	Campopleginae		Olesicampe	Olesicampe monticola	(Hedwig, 1938)
Arthropoda	Insecta	Hymenoptera	Ichneumonidae	Campopleginae		Olesicampe	Olesicampe nigroplica	(Thomson, 1887)
Arthropoda	Insecta	Hymenoptera	Ichneumonidae	Campopleginae		Olesicampe	Olesicampe paludicola	(Holmgren, 1860)
Arthropoda	Insecta	Hymenoptera	Ichneumonidae	Campopleginae		Olesicampe	Olesicampe patellana	(Thomson, 1887)
Arthropoda	Insecta	Hymenoptera	Ichneumonidae	Campopleginae		Olesicampe	Olesicampe praecox	(Holmgren, 1860)
Arthropoda	Insecta	Hymenoptera	Ichneumonidae	Campopleginae		Olesicampe	Olesicampe proterva	(Brischke, 1880)
Arthropoda	Insecta	Hymenoptera	Ichneumonidae	Campopleginae		Olesicampe	Olesicampe prussica	(Brischke, 1880)
Arthropoda	Insecta	Hymenoptera	Ichneumonidae	Campopleginae		Olesicampe	Olesicampe pubescens	(Ratzeburg, 1844)
Arthropoda	Insecta	Hymenoptera	Ichneumonidae	Campopleginae		Olesicampe	Olesicampe punctitarsis	(Thomson, 1887)
Arthropoda	Insecta	Hymenoptera	Ichneumonidae	Campopleginae		Olesicampe	Olesicampe radiella	(Thomson, 1885)
Arthropoda	Insecta	Hymenoptera	Ichneumonidae	Campopleginae		Olesicampe	Olesicampe ratzeburgi	(Tschek, 1871)
Arthropoda	Insecta	Hymenoptera	Ichneumonidae	Campopleginae		Olesicampe	Olesicampe retusa	(Thomson, 1887)
Arthropoda	Insecta	Hymenoptera	Ichneumonidae	Campopleginae		Olesicampe	Olesicampe sericea	(Holmgren, 1856)
Arthropoda	Insecta	Hymenoptera	Ichneumonidae	Campopleginae		Olesicampe	Olesicampe signata	(Brischke, 1880)
Arthropoda	Insecta	Hymenoptera	Ichneumonidae	Campopleginae		Olesicampe	Olesicampe sinuata	(Thomson, 1887)
Arthropoda	Insecta	Hymenoptera	Ichneumonidae	Campopleginae		Olesicampe	Olesicampe sordidella	(Holmgren, 1860)
Arthropoda	Insecta	Hymenoptera	Ichneumonidae	Campopleginae		Olesicampe	Olesicampe spireae	(Thomson, 1887)
Arthropoda	Insecta	Hymenoptera	Ichneumonidae	Campopleginae		Olesicampe	Olesicampe sternella	(Thomson, 1887)
Arthropoda	Insecta	Hymenoptera	Ichneumonidae	Campopleginae		Olesicampe	Olesicampe tarsator	(Thomson, 1887)
Arthropoda	Insecta	Hymenoptera	Ichneumonidae	Campopleginae		Olesicampe	Olesicampe terebrator	Hinz, 1975
Arthropoda	Insecta	Hymenoptera	Ichneumonidae	Campopleginae		Olesicampe	Olesicampe transiens	(Ratzeburg, 1848)
Arthropoda	Insecta	Hymenoptera	Ichneumonidae	Campopleginae		Olesicampe	Olesicampe vetula	(Holmgren, 1860)
Arthropoda	Insecta	Hymenoptera	Ichneumonidae	Campopleginae		Olesicampe	Olesicampe vexata	(Holmgren, 1860)
Arthropoda	Insecta	Hymenoptera	Ichneumonidae	Campopleginae		Olesicampe	Olesicampe vitripennis	(Holmgren, 1860)
Arthropoda	Insecta	Hymenoptera	Ichneumonidae	Campopleginae		Phobocampe	Phobocampe alticollis	(Thomson, 1887)
Arthropoda	Insecta	Hymenoptera	Ichneumonidae	Campopleginae		Phobocampe	Phobocampe bicingulata	(Gravenhorst, 1829)
Arthropoda	Insecta	Hymenoptera	Ichneumonidae	Campopleginae		Phobocampe	Phobocampe brumatae	Horstmann, 2009
Arthropoda	Insecta	Hymenoptera	Ichneumonidae	Campopleginae		Phobocampe	Phobocampe confusa	(Thomson, 1887)
Arthropoda	Insecta	Hymenoptera	Ichneumonidae	Campopleginae		Phobocampe	Phobocampe crassiuscula	(Gravenhorst, 1829)
Arthropoda	Insecta	Hymenoptera	Ichneumonidae	Campopleginae		Phobocampe	Phobocampe croceipes	(Marshall, 1876)
Arthropoda	Insecta	Hymenoptera	Ichneumonidae	Campopleginae		Phobocampe	Phobocampe flavicincta	(Thomson, 1887)
Arthropoda	Insecta	Hymenoptera	Ichneumonidae	Campopleginae		Phobocampe	Phobocampe horstmanni	Sedivy, 2004
Arthropoda	Insecta	Hymenoptera	Ichneumonidae	Campopleginae		Phobocampe	Phobocampe luctuosa	Schmiedeknecht, 1909
Arthropoda	Insecta	Hymenoptera	Ichneumonidae	Campopleginae		Phobocampe	Phobocampe nigra	Sedivy, 2004
Arthropoda	Insecta	Hymenoptera	Ichneumonidae	Campopleginae		Phobocampe	Phobocampe pulchella	(Thomson, 1887)
Arthropoda	Insecta	Hymenoptera	Ichneumonidae	Campopleginae		Phobocampe	Phobocampe pullata	Ulbricht, 1910
Arthropoda	Insecta	Hymenoptera	Ichneumonidae	Campopleginae		Phobocampe	Phobocampe quercus	Horstmann, 2008
Arthropoda	Insecta	Hymenoptera	Ichneumonidae	Campopleginae		Phobocampe	Phobocampe tempestiva	(Holmgren, 1860)
Arthropoda	Insecta	Hymenoptera	Ichneumonidae	Campopleginae		Phobocampe	Phobocampe unicincta	(Gravenhorst, 1829)
Arthropoda	Insecta	Hymenoptera	Ichneumonidae	Campopleginae		Porizon	Porizon albistriae	(Horstmann, 1987)
Arthropoda	Insecta	Hymenoptera	Ichneumonidae	Campopleginae		Porizon	Porizon humuli	(Horstmann, 1987)
Arthropoda	Insecta	Hymenoptera	Ichneumonidae	Campopleginae		Porizon	Porizon moderator	(Linnaeus, 1758)
Arthropoda	Insecta	Hymenoptera	Ichneumonidae	Campopleginae		Porizon	Porizon transfuga	(Gravenhorst, 1829)
Arthropoda	Insecta	Hymenoptera	Ichneumonidae	Campopleginae		Pyracmon	Pyracmon fumipennis	(Zetterstedt, 1838)
Arthropoda	Insecta	Hymenoptera	Ichneumonidae	Campopleginae		Pyracmon	Pyracmon sepiellus	(Holmgren, 1860)
Arthropoda	Insecta	Hymenoptera	Ichneumonidae	Campopleginae		Pyracmon	Pyracmon truncicola	Thomson, 1887
Arthropoda	Insecta	Hymenoptera	Ichneumonidae	Campopleginae		Rhimphoctona	Rhimphoctona grandis	(Fonscolombe, 1852)
Arthropoda	Insecta	Hymenoptera	Ichneumonidae	Campopleginae		Rhimphoctona	Rhimphoctona longicauda	Horstmann, 1980
Arthropoda	Insecta	Hymenoptera	Ichneumonidae	Campopleginae		Rhimphoctona	Rhimphoctona lucida	(Clément, 1924)
Arthropoda	Insecta	Hymenoptera	Ichneumonidae	Campopleginae		Rhimphoctona	Rhimphoctona megacephalus	(Gravenhorst, 1829)
Arthropoda	Insecta	Hymenoptera	Ichneumonidae	Campopleginae		Rhimphoctona	Rhimphoctona melanura	(Holmgren, 1860)
Arthropoda	Insecta	Hymenoptera	Ichneumonidae	Campopleginae		Rhimphoctona	Rhimphoctona obscuripes	(Holmgren, 1860)
Arthropoda	Insecta	Hymenoptera	Ichneumonidae	Campopleginae		Rhimphoctona	Rhimphoctona pectoralis	(Kriechbaumer, 1890)
Arthropoda	Insecta	Hymenoptera	Ichneumonidae	Campopleginae		Rhimphoctona	Rhimphoctona rufocoxalis	(Clément, 1924)
Arthropoda	Insecta	Hymenoptera	Ichneumonidae	Campopleginae		Rhimphoctona	Rhimphoctona teredo	(Hartig, 1847)
Arthropoda	Insecta	Hymenoptera	Ichneumonidae	Campopleginae		Rhimphoctona	Rhimphoctona xoridiformis	(Holmgren, 1860)
Arthropoda	Insecta	Hymenoptera	Ichneumonidae	Campopleginae		Scirtetes	Scirtetes robustus	(Woldstedt, 1877)
Arthropoda	Insecta	Hymenoptera	Ichneumonidae	Campopleginae		Sinophorus	Sinophorus albidus	(Gmelin, 1790)
Arthropoda	Insecta	Hymenoptera	Ichneumonidae	Campopleginae		Sinophorus	Sinophorus bridgmanii	(Dalla Torre, 1901)
Arthropoda	Insecta	Hymenoptera	Ichneumonidae	Campopleginae		Sinophorus	Sinophorus confusus	Horstmann, 1992
Arthropoda	Insecta	Hymenoptera	Ichneumonidae	Campopleginae		Sinophorus	Sinophorus costalis	(Thomson, 1887)
Arthropoda	Insecta	Hymenoptera	Ichneumonidae	Campopleginae		Sinophorus	Sinophorus crassifemur	(Thomson, 1887)
Arthropoda	Insecta	Hymenoptera	Ichneumonidae	Campopleginae		Sinophorus	Sinophorus fuscicarpus	(Thomson, 1887)
Arthropoda	Insecta	Hymenoptera	Ichneumonidae	Campopleginae		Sinophorus	Sinophorus geniculatus	(Gravenhorst, 1829)
Arthropoda	Insecta	Hymenoptera	Ichneumonidae	Campopleginae		Sinophorus	Sinophorus juniperinus	(Holmgren, 1856)
Arthropoda	Insecta	Hymenoptera	Ichneumonidae	Campopleginae		Sinophorus	Sinophorus latifossus	Sanborne, 1984
Arthropoda	Insecta	Hymenoptera	Ichneumonidae	Campopleginae		Sinophorus	Sinophorus nigricoxa	Sanborne, 1984
Arthropoda	Insecta	Hymenoptera	Ichneumonidae	Campopleginae		Sinophorus	Sinophorus nitidus	(Brischke, 1880)
Arthropoda	Insecta	Hymenoptera	Ichneumonidae	Campopleginae		Sinophorus	Sinophorus pectinatus	Sanborne, 1984
Arthropoda	Insecta	Hymenoptera	Ichneumonidae	Campopleginae		Sinophorus	Sinophorus pleuralis	(Thomson, 1887)
Arthropoda	Insecta	Hymenoptera	Ichneumonidae	Campopleginae		Sinophorus	Sinophorus punctifrons	Sanborne, 1984
Arthropoda	Insecta	Hymenoptera	Ichneumonidae	Campopleginae		Sinophorus	Sinophorus sticticalae	Sanborne, 1984
Arthropoda	Insecta	Hymenoptera	Ichneumonidae	Campopleginae		Sinophorus	Sinophorus tricoloripes	(Schmiedeknecht, 1909)
Arthropoda	Insecta	Hymenoptera	Ichneumonidae	Campopleginae		Sinophorus	Sinophorus turionum	(Ratzeburg, 1844)
Arthropoda	Insecta	Hymenoptera	Ichneumonidae	Campopleginae		Sinophorus	Sinophorus villosus	Sanborne, 1984
Arthropoda	Insecta	Hymenoptera	Ichneumonidae	Campopleginae		Sinophorus	Sinophorus xanthostomus	(Gravenhorst, 1829)
Arthropoda	Insecta	Hymenoptera	Ichneumonidae	Campopleginae		Synetaeris	Synetaeris brevicauda	(Horstmann, 1987)
Arthropoda	Insecta	Hymenoptera	Ichneumonidae	Campopleginae		Synetaeris	Synetaeris heteropus	Thomson, 1887
Arthropoda	Insecta	Hymenoptera	Ichneumonidae	Campopleginae		Tranosema	Tranosema atramentarium	(Schmiedeknecht, 1909)
Arthropoda	Insecta	Hymenoptera	Ichneumonidae	Campopleginae		Tranosema	Tranosema carbonellum	(Thomson, 1887)
Arthropoda	Insecta	Hymenoptera	Ichneumonidae	Campopleginae		Tranosema	Tranosema exoletum	(Thomson, 1887)
Arthropoda	Insecta	Hymenoptera	Ichneumonidae	Campopleginae		Tranosema	Tranosema hyperboreum	(Thomson, 1887)
Arthropoda	Insecta	Hymenoptera	Ichneumonidae	Campopleginae		Tranosema	Tranosema latiusculum	Thomson, 1887
Arthropoda	Insecta	Hymenoptera	Ichneumonidae	Campopleginae		Tranosema	Tranosema mendicae	Horstmann, 1987
Arthropoda	Insecta	Hymenoptera	Ichneumonidae	Campopleginae		Tranosema	Tranosema nigridens	(Thomson, 1887)
Arthropoda	Insecta	Hymenoptera	Ichneumonidae	Campopleginae		Tranosema	Tranosema rostrale	(Brischke, 1880)
Arthropoda	Insecta	Hymenoptera	Ichneumonidae	Campopleginae		Tranosema	Tranosema variabile	Horstmann, 2008
Arthropoda	Insecta	Hymenoptera	Ichneumonidae	Campopleginae		Tranosemella	Tranosemella citrofrontalis	(Hedwig, 1939)
Arthropoda	Insecta	Hymenoptera	Ichneumonidae	Campopleginae		Tranosemella	Tranosemella coxalis	(Brischke, 1880)
Arthropoda	Insecta	Hymenoptera	Ichneumonidae	Campopleginae		Tranosemella	Tranosemella praerogator	(Linnaeus, 1758)
Arthropoda	Insecta	Hymenoptera	Ichneumonidae	Campopleginae		Venturia	Venturia canescens	(Gravenhorst, 1829)
Arthropoda	Insecta	Hymenoptera	Ichneumonidae	Collyriinae		Collyria	Collyria coxator	(Villers, 1789)
Arthropoda	Insecta	Hymenoptera	Ichneumonidae	Collyriinae		Collyria	Collyria trichophthalma	(Thomson, 1877)
Arthropoda	Insecta	Hymenoptera	Ichneumonidae	Cremastinae		Cremastus	Cremastus bellicosus	Gravenhorst, 1829
Arthropoda	Insecta	Hymenoptera	Ichneumonidae	Cremastinae		Cremastus	Cremastus crassicornis	Thomson, 1890
Arthropoda	Insecta	Hymenoptera	Ichneumonidae	Cremastinae		Cremastus	Cremastus geminus	Gravenhorst, 1829
Arthropoda	Insecta	Hymenoptera	Ichneumonidae	Cremastinae		Cremastus	Cremastus infirmus	Gravenhorst, 1829
Arthropoda	Insecta	Hymenoptera	Ichneumonidae	Cremastinae		Cremastus	Cremastus kratochvili	Sedivy, 1970
Arthropoda	Insecta	Hymenoptera	Ichneumonidae	Cremastinae		Cremastus	Cremastus puberulus	Szépligeti, 1899
Arthropoda	Insecta	Hymenoptera	Ichneumonidae	Cremastinae		Cremastus	Cremastus pungens	Gravenhorst, 1829
Arthropoda	Insecta	Hymenoptera	Ichneumonidae	Cremastinae		Cremastus	Cremastus spectator	Gravenhorst, 1829
Arthropoda	Insecta	Hymenoptera	Ichneumonidae	Cremastinae		Dimophora	Dimophora evanialis	(Gravenhorst, 1829)
Arthropoda	Insecta	Hymenoptera	Ichneumonidae	Cremastinae		Dimophora	Dimophora nitens	(Gravenhorst, 1829)
Arthropoda	Insecta	Hymenoptera	Ichneumonidae	Cremastinae		Pristomerus	Pristomerus armatus	(Lucas, 1849)
Arthropoda	Insecta	Hymenoptera	Ichneumonidae	Cremastinae		Pristomerus	Pristomerus horribilis	Narolsky, 1987
Arthropoda	Insecta	Hymenoptera	Ichneumonidae	Cremastinae		Pristomerus	Pristomerus luridus	Kokujev, 1905
Arthropoda	Insecta	Hymenoptera	Ichneumonidae	Cremastinae		Pristomerus	Pristomerus orbitalis	Holmgren, 1860
Arthropoda	Insecta	Hymenoptera	Ichneumonidae	Cremastinae		Pristomerus	Pristomerus vulnerator	(Panzer, 1799)
Arthropoda	Insecta	Hymenoptera	Ichneumonidae	Cremastinae		Temelucha	Temelucha arenosa	(Szépligeti, 1899)
Arthropoda	Insecta	Hymenoptera	Ichneumonidae	Cremastinae		Temelucha	Temelucha confluens	(Gravenhorst, 1829)
Arthropoda	Insecta	Hymenoptera	Ichneumonidae	Cremastinae		Temelucha	Temelucha decorata	(Gravenhorst, 1829)
Arthropoda	Insecta	Hymenoptera	Ichneumonidae	Cremastinae		Temelucha	Temelucha discoidalis	(Szépligeti, 1899)
Arthropoda	Insecta	Hymenoptera	Ichneumonidae	Cremastinae		Temelucha	Temelucha genalis	(Szépligeti, 1899)
Arthropoda	Insecta	Hymenoptera	Ichneumonidae	Cremastinae		Temelucha	Temelucha interruptor	(Gravenhorst, 1829)
Arthropoda	Insecta	Hymenoptera	Ichneumonidae	Cremastinae		Temelucha	Temelucha mohelnensis	Sedivy, 1971
Arthropoda	Insecta	Hymenoptera	Ichneumonidae	Cremastinae		Temelucha	Temelucha ophthalmica	(Holmgren, 1866)
Arthropoda	Insecta	Hymenoptera	Ichneumonidae	Cremastinae		Temelucha	Temelucha signata	(Holmgren, 1860)
Arthropoda	Insecta	Hymenoptera	Ichneumonidae	Cremastinae		Temelucha	Temelucha subnasuta	(Thomson, 1890)
Arthropoda	Insecta	Hymenoptera	Ichneumonidae	Cremastinae		Temelucha	Temelucha variipes	(Szépligeti, 1899)
Arthropoda	Insecta	Hymenoptera	Ichneumonidae	Cryptinae	Aptesini	Aconias	Aconias tarsatus	(Bridgman, 1881)
Arthropoda	Insecta	Hymenoptera	Ichneumonidae	Cryptinae	Aptesini	Aptesis	Aptesis assimilis	(Gravenhorst, 1829)
Arthropoda	Insecta	Hymenoptera	Ichneumonidae	Cryptinae	Aptesini	Aptesis	Aptesis cretata	(Gravenhorst, 1829)
Arthropoda	Insecta	Hymenoptera	Ichneumonidae	Cryptinae	Aptesini	Aptesis	Aptesis exquisita	(Schmiedeknecht, 1905)
Arthropoda	Insecta	Hymenoptera	Ichneumonidae	Cryptinae	Aptesini	Aptesis	Aptesis femoralis	(Thomson, 1883)
Arthropoda	Insecta	Hymenoptera	Ichneumonidae	Cryptinae	Aptesini	Aptesis	Aptesis flagitator	(Rossi, 1794)
Arthropoda	Insecta	Hymenoptera	Ichneumonidae	Cryptinae	Aptesini	Aptesis	Aptesis flavifaciator	Aubert, 1968
Arthropoda	Insecta	Hymenoptera	Ichneumonidae	Cryptinae	Aptesini	Aptesis	Aptesis gravipes	(Gravenhorst, 1829)
Arthropoda	Insecta	Hymenoptera	Ichneumonidae	Cryptinae	Aptesini	Aptesis	Aptesis improba	(Gravenhorst, 1829)
Arthropoda	Insecta	Hymenoptera	Ichneumonidae	Cryptinae	Aptesini	Aptesis	Aptesis jejunator	(Gravenhorst, 1807)
Arthropoda	Insecta	Hymenoptera	Ichneumonidae	Cryptinae	Aptesini	Aptesis	Aptesis leucotarsus	(Gravenhorst, 1829)
Arthropoda	Insecta	Hymenoptera	Ichneumonidae	Cryptinae	Aptesini	Aptesis	Aptesis nigricollis	(Thomson, 1883)
Arthropoda	Insecta	Hymenoptera	Ichneumonidae	Cryptinae	Aptesini	Aptesis	Aptesis nigritula	(Thomson, 1885)
Arthropoda	Insecta	Hymenoptera	Ichneumonidae	Cryptinae	Aptesini	Aptesis	Aptesis nigrocincta	(Gravenhorst, 1815)
Arthropoda	Insecta	Hymenoptera	Ichneumonidae	Cryptinae	Aptesini	Aptesis	Aptesis orbitalis	(Thomson, 1883)
Arthropoda	Insecta	Hymenoptera	Ichneumonidae	Cryptinae	Aptesini	Aptesis	Aptesis pectoralis	(Thomson, 1888)
Arthropoda	Insecta	Hymenoptera	Ichneumonidae	Cryptinae	Aptesini	Aptesis	Aptesis perversa	(Kriechbaumer, 1893)
Arthropoda	Insecta	Hymenoptera	Ichneumonidae	Cryptinae	Aptesini	Aptesis	Aptesis pugnax	(Hartig, 1838)
Arthropoda	Insecta	Hymenoptera	Ichneumonidae	Cryptinae	Aptesini	Aptesis	Aptesis senicula	(Kriechbaumer, 1893)
Arthropoda	Insecta	Hymenoptera	Ichneumonidae	Cryptinae	Aptesini	Aptesis	Aptesis terminata	(Gravenhorst, 1829)
Arthropoda	Insecta	Hymenoptera	Ichneumonidae	Cryptinae	Aptesini	Colocnema	Colocnema rufina	(Gravenhorst, 1829)
Arthropoda	Insecta	Hymenoptera	Ichneumonidae	Cryptinae	Aptesini	Cratocryptus	Cratocryptus furcator	(Gravenhorst, 1829)
Arthropoda	Insecta	Hymenoptera	Ichneumonidae	Cryptinae	Aptesini	Cratocryptus	Cratocryptus subpetiolatus	(Gravenhorst, 1829)
Arthropoda	Insecta	Hymenoptera	Ichneumonidae	Cryptinae	Aptesini	Cubocephalus	Cubocephalus anatorius	(Gravenhorst, 1829)
Arthropoda	Insecta	Hymenoptera	Ichneumonidae	Cryptinae	Aptesini	Cubocephalus	Cubocephalus annulitarsis	(Thomson, 1873)
Arthropoda	Insecta	Hymenoptera	Ichneumonidae	Cryptinae	Aptesini	Cubocephalus	Cubocephalus associator	(Thunberg, 1824)
Arthropoda	Insecta	Hymenoptera	Ichneumonidae	Cryptinae	Aptesini	Cubocephalus	Cubocephalus brevicornis	(Taschenberg, 1865)
Arthropoda	Insecta	Hymenoptera	Ichneumonidae	Cryptinae	Aptesini	Cubocephalus	Cubocephalus distinctor	(Thunberg, 1824)
Arthropoda	Insecta	Hymenoptera	Ichneumonidae	Cryptinae	Aptesini	Cubocephalus	Cubocephalus femoralis	(Thomson, 1873)
Arthropoda	Insecta	Hymenoptera	Ichneumonidae	Cryptinae	Aptesini	Cubocephalus	Cubocephalus fortipes	(Gravenhorst, 1829)
Arthropoda	Insecta	Hymenoptera	Ichneumonidae	Cryptinae	Aptesini	Cubocephalus	Cubocephalus insidiator	(Gravenhorst, 1829)
Arthropoda	Insecta	Hymenoptera	Ichneumonidae	Cryptinae	Aptesini	Cubocephalus	Cubocephalus lacteator	(Gravenhorst, 1829)
Arthropoda	Insecta	Hymenoptera	Ichneumonidae	Cryptinae	Aptesini	Cubocephalus	Cubocephalus leucopygus	(Kriechbaumer, 1891)
Arthropoda	Insecta	Hymenoptera	Ichneumonidae	Cryptinae	Aptesini	Cubocephalus	Cubocephalus longicauda	(Thomson, 1883)
Arthropoda	Insecta	Hymenoptera	Ichneumonidae	Cryptinae	Aptesini	Cubocephalus	Cubocephalus mirabilis	(Heinrich, 1949)
Arthropoda	Insecta	Hymenoptera	Ichneumonidae	Cryptinae	Aptesini	Cubocephalus	Cubocephalus montanus	(Gravenhorst, 1829)
Arthropoda	Insecta	Hymenoptera	Ichneumonidae	Cryptinae	Aptesini	Cubocephalus	Cubocephalus nigriventris	(Thomson, 1874)
Arthropoda	Insecta	Hymenoptera	Ichneumonidae	Cryptinae	Aptesini	Cubocephalus	Cubocephalus silesiacus	Habermehl, 1911
Arthropoda	Insecta	Hymenoptera	Ichneumonidae	Cryptinae	Aptesini	Cubocephalus	Cubocephalus sperator	(Müller, 1776)
Arthropoda	Insecta	Hymenoptera	Ichneumonidae	Cryptinae	Aptesini	Cubocephalus	Cubocephalus sternocerus	(Thomson, 1873)
Arthropoda	Insecta	Hymenoptera	Ichneumonidae	Cryptinae	Aptesini	Cubocephalus	Cubocephalus thomsoni	(Habermehl, 1911)
Arthropoda	Insecta	Hymenoptera	Ichneumonidae	Cryptinae	Aptesini	Demopheles	Demopheles corruptor	(Taschenberg, 1865)
Arthropoda	Insecta	Hymenoptera	Ichneumonidae	Cryptinae	Aptesini	Echthrus	Echthrus reluctator	(Linnaeus, 1758)
Arthropoda	Insecta	Hymenoptera	Ichneumonidae	Cryptinae	Aptesini	Giraudia	Giraudia grisescens	(Gravenhorst, 1829)
Arthropoda	Insecta	Hymenoptera	Ichneumonidae	Cryptinae	Aptesini	Giraudia	Giraudia gyratoria	(Thunberg, 1824)
Arthropoda	Insecta	Hymenoptera	Ichneumonidae	Cryptinae	Aptesini	Hemiphanes	Hemiphanes erratum	Humala, 2007
Arthropoda	Insecta	Hymenoptera	Ichneumonidae	Cryptinae	Aptesini	Hemiphanes	Hemiphanes flavipes	Förster, 1871
Arthropoda	Insecta	Hymenoptera	Ichneumonidae	Cryptinae	Aptesini	Hemiphanes	Hemiphanes gravator	Förster, 1871
Arthropoda	Insecta	Hymenoptera	Ichneumonidae	Cryptinae	Aptesini	Javra	Javra anomala	(Morley, 1908)
Arthropoda	Insecta	Hymenoptera	Ichneumonidae	Cryptinae	Aptesini	Javra	Javra jemilleri	(Kriechbaumer, 1893)
Arthropoda	Insecta	Hymenoptera	Ichneumonidae	Cryptinae	Aptesini	Javra	Javra opaca	(Thomson, 1873)
Arthropoda	Insecta	Hymenoptera	Ichneumonidae	Cryptinae	Aptesini	Javra	Javra thuringiaca	(Schmiedeknecht, 1905)
Arthropoda	Insecta	Hymenoptera	Ichneumonidae	Cryptinae	Aptesini	Javra	Javra tricincta	(Gravenhorst, 1829)
Arthropoda	Insecta	Hymenoptera	Ichneumonidae	Cryptinae	Aptesini	Listrocryptus	Listrocryptus spatulatus	Brauns, 1905
Arthropoda	Insecta	Hymenoptera	Ichneumonidae	Cryptinae	Aptesini	Megaplectes	Megaplectes monticola	(Gravenhorst, 1829)
Arthropoda	Insecta	Hymenoptera	Ichneumonidae	Cryptinae	Aptesini	Oresbius	Oresbius alpinophilus	Sawoniewicz, 1993
Arthropoda	Insecta	Hymenoptera	Ichneumonidae	Cryptinae	Aptesini	Oresbius	Oresbius arridens	(Gravenhorst, 1829)
Arthropoda	Insecta	Hymenoptera	Ichneumonidae	Cryptinae	Aptesini	Oresbius	Oresbius bipunctatus	(Schmiedeknecht, 1931)
Arthropoda	Insecta	Hymenoptera	Ichneumonidae	Cryptinae	Aptesini	Oresbius	Oresbius galactinus	(Gravenhorst, 1829)
Arthropoda	Insecta	Hymenoptera	Ichneumonidae	Cryptinae	Aptesini	Oresbius	Oresbius habermehli	(Ulbricht, 1910)
Arthropoda	Insecta	Hymenoptera	Ichneumonidae	Cryptinae	Aptesini	Oresbius	Oresbius leucopsis	(Gravenhorst, 1829)
Arthropoda	Insecta	Hymenoptera	Ichneumonidae	Cryptinae	Aptesini	Oresbius	Oresbius nigricornis	(Thomson, 1883)
Arthropoda	Insecta	Hymenoptera	Ichneumonidae	Cryptinae	Aptesini	Oresbius	Oresbius nivalis	(Zetterstedt, 1838)
Arthropoda	Insecta	Hymenoptera	Ichneumonidae	Cryptinae	Aptesini	Oresbius	Oresbius punctifer	(Thomson, 1883)
Arthropoda	Insecta	Hymenoptera	Ichneumonidae	Cryptinae	Aptesini	Oresbius	Oresbius septentrionalis	(Thomson, 1883)
Arthropoda	Insecta	Hymenoptera	Ichneumonidae	Cryptinae	Aptesini	Oresbius	Oresbius subguttatus	(Gravenhorst, 1829)
Arthropoda	Insecta	Hymenoptera	Ichneumonidae	Cryptinae	Aptesini	Parmortha	Parmortha parvula	(Gravenhorst, 1829)
Arthropoda	Insecta	Hymenoptera	Ichneumonidae	Cryptinae	Aptesini	Parmortha	Parmortha pleuralis	(Thomson, 1873)
Arthropoda	Insecta	Hymenoptera	Ichneumonidae	Cryptinae	Aptesini	Plectocryptus	Plectocryptus albulatorius	(Gravenhorst, 1829)
Arthropoda	Insecta	Hymenoptera	Ichneumonidae	Cryptinae	Aptesini	Plectocryptus	Plectocryptus alpinus	(Kriechbaumer, 1893)
Arthropoda	Insecta	Hymenoptera	Ichneumonidae	Cryptinae	Aptesini	Plectocryptus	Plectocryptus digitatus	(Gmelin, 1790)
Arthropoda	Insecta	Hymenoptera	Ichneumonidae	Cryptinae	Aptesini	Plectocryptus	Plectocryptus effeminatus	(Gravenhorst, 1829)
Arthropoda	Insecta	Hymenoptera	Ichneumonidae	Cryptinae	Aptesini	Plectocryptus	Plectocryptus periculosus	(Schmiedeknecht, 1905)
Arthropoda	Insecta	Hymenoptera	Ichneumonidae	Cryptinae	Aptesini	Plectocryptus	Plectocryptus poecilops	(Kriechbaumer, 1891)
Arthropoda	Insecta	Hymenoptera	Ichneumonidae	Cryptinae	Aptesini	Pleolophus	Pleolophus basizonus	(Gravenhorst, 1829)
Arthropoda	Insecta	Hymenoptera	Ichneumonidae	Cryptinae	Aptesini	Pleolophus	Pleolophus brachypterus	(Gravenhorst, 1815)
Arthropoda	Insecta	Hymenoptera	Ichneumonidae	Cryptinae	Aptesini	Pleolophus	Pleolophus cerinostomus	(Gravenhorst, 1829)
Arthropoda	Insecta	Hymenoptera	Ichneumonidae	Cryptinae	Aptesini	Pleolophus	Pleolophus isomorphus	(Schmiedeknecht, 1932)
Arthropoda	Insecta	Hymenoptera	Ichneumonidae	Cryptinae	Aptesini	Pleolophus	Pleolophus lapponicus	(Thomson, 1883)
Arthropoda	Insecta	Hymenoptera	Ichneumonidae	Cryptinae	Aptesini	Pleolophus	Pleolophus larvatus	(Gravenhorst, 1829)
Arthropoda	Insecta	Hymenoptera	Ichneumonidae	Cryptinae	Aptesini	Pleolophus	Pleolophus micropterus	(Gravenhorst, 1815)
Arthropoda	Insecta	Hymenoptera	Ichneumonidae	Cryptinae	Aptesini	Pleolophus	Pleolophus secernendus	(Schmiedeknecht, 1905)
Arthropoda	Insecta	Hymenoptera	Ichneumonidae	Cryptinae	Aptesini	Pleolophus	Pleolophus sericans	(Gravenhorst, 1829)
Arthropoda	Insecta	Hymenoptera	Ichneumonidae	Cryptinae	Aptesini	Pleolophus	Pleolophus vestigialis	(Förster, 1850)
Arthropoda	Insecta	Hymenoptera	Ichneumonidae	Cryptinae	Aptesini	Polytribax	Polytribax arrogans	(Gravenhorst, 1829)
Arthropoda	Insecta	Hymenoptera	Ichneumonidae	Cryptinae	Aptesini	Polytribax	Polytribax perspicillator	(Gravenhorst, 1807)
Arthropoda	Insecta	Hymenoptera	Ichneumonidae	Cryptinae	Aptesini	Polytribax	Polytribax picticornis	(Ruthe, 1859)
Arthropoda	Insecta	Hymenoptera	Ichneumonidae	Cryptinae	Aptesini	Polytribax	Polytribax rufipes	(Gravenhorst, 1829)
Arthropoda	Insecta	Hymenoptera	Ichneumonidae	Cryptinae	Aptesini	Polytribax	Polytribax senex	(Kriechbaumer, 1893)
Arthropoda	Insecta	Hymenoptera	Ichneumonidae	Cryptinae	Aptesini	Schenkia	Schenkia aries	(Thomson, 1883)
Arthropoda	Insecta	Hymenoptera	Ichneumonidae	Cryptinae	Aptesini	Schenkia	Schenkia crassicornis	(Kriechbaumer, 1891)
Arthropoda	Insecta	Hymenoptera	Ichneumonidae	Cryptinae	Aptesini	Schenkia	Schenkia exigua	(Habermehl, 1909)
Arthropoda	Insecta	Hymenoptera	Ichneumonidae	Cryptinae	Aptesini	Schenkia	Schenkia graminicola	(Gravenhorst, 1829)
Arthropoda	Insecta	Hymenoptera	Ichneumonidae	Cryptinae	Aptesini	Schenkia	Schenkia humeralis	Sawoniewicz, 1993
Arthropoda	Insecta	Hymenoptera	Ichneumonidae	Cryptinae	Aptesini	Schenkia	Schenkia labralis	(Gravenhorst, 1829)
Arthropoda	Insecta	Hymenoptera	Ichneumonidae	Cryptinae	Aptesini	Schenkia	Schenkia opacula	(Thomson, 1883)
Arthropoda	Insecta	Hymenoptera	Ichneumonidae	Cryptinae	Aptesini	Schenkia	Schenkia rubricollis	(Thomson, 1883)
Arthropoda	Insecta	Hymenoptera	Ichneumonidae	Cryptinae	Aptesini	Schenkia	Schenkia rufithorax	(Strobl, 1901)
Arthropoda	Insecta	Hymenoptera	Ichneumonidae	Cryptinae	Aptesini	Schenkia	Schenkia spinolae	(Gravenhorst, 1829)
Arthropoda	Insecta	Hymenoptera	Ichneumonidae	Cryptinae	Cryptini	Acroricnus	Acroricnus stylator	(Thunberg, 1824)
Arthropoda	Insecta	Hymenoptera	Ichneumonidae	Cryptinae	Cryptini	Agrothereutes	Agrothereutes abbreviatus	(Fabricius, 1794)
Arthropoda	Insecta	Hymenoptera	Ichneumonidae	Cryptinae	Cryptini	Agrothereutes	Agrothereutes adustus	(Gravenhorst, 1829)
Arthropoda	Insecta	Hymenoptera	Ichneumonidae	Cryptinae	Cryptini	Agrothereutes	Agrothereutes aterrimus	(Gravenhorst, 1829)
Arthropoda	Insecta	Hymenoptera	Ichneumonidae	Cryptinae	Cryptini	Agrothereutes	Agrothereutes australis	(Habermehl, 1926)
Arthropoda	Insecta	Hymenoptera	Ichneumonidae	Cryptinae	Cryptini	Agrothereutes	Agrothereutes fumipennis	(Gravenhorst, 1829)
Arthropoda	Insecta	Hymenoptera	Ichneumonidae	Cryptinae	Cryptini	Agrothereutes	Agrothereutes hospes	(Tschek, 1871)
Arthropoda	Insecta	Hymenoptera	Ichneumonidae	Cryptinae	Cryptini	Agrothereutes	Agrothereutes leucorhaeus	(Donovan, 1810)
Arthropoda	Insecta	Hymenoptera	Ichneumonidae	Cryptinae	Cryptini	Agrothereutes	Agrothereutes mandator	(Linnaeus, 1758)
Arthropoda	Insecta	Hymenoptera	Ichneumonidae	Cryptinae	Cryptini	Agrothereutes	Agrothereutes mansuetor	(Tschek, 1871)
Arthropoda	Insecta	Hymenoptera	Ichneumonidae	Cryptinae	Cryptini	Agrothereutes	Agrothereutes pumilus	(Kriechbaumer, 1899)
Arthropoda	Insecta	Hymenoptera	Ichneumonidae	Cryptinae	Cryptini	Agrothereutes	Agrothereutes saturniae	(Boie, 1855)
Arthropoda	Insecta	Hymenoptera	Ichneumonidae	Cryptinae	Cryptini	Agrothereutes	Agrothereutes tibialis	(Thomson, 1873)
Arthropoda	Insecta	Hymenoptera	Ichneumonidae	Cryptinae	Cryptini	Apsilops	Apsilops aquaticus	(Thomson, 1874)
Arthropoda	Insecta	Hymenoptera	Ichneumonidae	Cryptinae	Cryptini	Apsilops	Apsilops cinctorius	(Fabricius, 1775)
Arthropoda	Insecta	Hymenoptera	Ichneumonidae	Cryptinae	Cryptini	Aritranis	Aritranis director	(Thunberg, 1824)
Arthropoda	Insecta	Hymenoptera	Ichneumonidae	Cryptinae	Cryptini	Aritranis	Aritranis explorator	(Tschek, 1871)
Arthropoda	Insecta	Hymenoptera	Ichneumonidae	Cryptinae	Cryptini	Aritranis	Aritranis nigrifemur	(Szépligeti, 1916)
Arthropoda	Insecta	Hymenoptera	Ichneumonidae	Cryptinae	Cryptini	Aritranis	Aritranis nigripes	(Gravenhorst, 1829)
Arthropoda	Insecta	Hymenoptera	Ichneumonidae	Cryptinae	Cryptini	Aritranis	Aritranis occisor	(Gravenhorst, 1829)
Arthropoda	Insecta	Hymenoptera	Ichneumonidae	Cryptinae	Cryptini	Buathra	Buathra divisoria	(Tschek, 1872)
Arthropoda	Insecta	Hymenoptera	Ichneumonidae	Cryptinae	Cryptini	Buathra	Buathra laborator	(Thunberg, 1824)
Arthropoda	Insecta	Hymenoptera	Ichneumonidae	Cryptinae	Cryptini	Buathra	Buathra tarsoleucos	(Schrank, 1781)
Arthropoda	Insecta	Hymenoptera	Ichneumonidae	Cryptinae	Cryptini	Caenocryptus	Caenocryptus rufiventris	(Gravenhorst, 1829)
Arthropoda	Insecta	Hymenoptera	Ichneumonidae	Cryptinae	Cryptini	Cryptus	Cryptus apparitorius	(Villers, 1789)
Arthropoda	Insecta	Hymenoptera	Ichneumonidae	Cryptinae	Cryptini	Cryptus	Cryptus armator	Fabricius, 1804
Arthropoda	Insecta	Hymenoptera	Ichneumonidae	Cryptinae	Cryptini	Cryptus	Cryptus dianae	Gravenhorst, 1829
Arthropoda	Insecta	Hymenoptera	Ichneumonidae	Cryptinae	Cryptini	Cryptus	Cryptus fibulatus	Gravenhorst, 1829
Arthropoda	Insecta	Hymenoptera	Ichneumonidae	Cryptinae	Cryptini	Cryptus	Cryptus immitis	Tschek, 1871
Arthropoda	Insecta	Hymenoptera	Ichneumonidae	Cryptinae	Cryptini	Cryptus	Cryptus incisus	Tschek, 1871
Arthropoda	Insecta	Hymenoptera	Ichneumonidae	Cryptinae	Cryptini	Cryptus	Cryptus inculcator	(Linnaeus, 1758)
Arthropoda	Insecta	Hymenoptera	Ichneumonidae	Cryptinae	Cryptini	Cryptus	Cryptus leucocheir	(Ratzeburg, 1844)
Arthropoda	Insecta	Hymenoptera	Ichneumonidae	Cryptinae	Cryptini	Cryptus	Cryptus luctuosus holalpinus	Heinrich, 1951
Arthropoda	Insecta	Hymenoptera	Ichneumonidae	Cryptinae	Cryptini	Cryptus	Cryptus lugubris	Gravenhorst, 1829
Arthropoda	Insecta	Hymenoptera	Ichneumonidae	Cryptinae	Cryptini	Cryptus	Cryptus minator	Gravenhorst, 1829
Arthropoda	Insecta	Hymenoptera	Ichneumonidae	Cryptinae	Cryptini	Cryptus	Cryptus moschator	(Fabricius, 1787)
Arthropoda	Insecta	Hymenoptera	Ichneumonidae	Cryptinae	Cryptini	Cryptus	Cryptus obscuripes	Zetterstedt, 1838
Arthropoda	Insecta	Hymenoptera	Ichneumonidae	Cryptinae	Cryptini	Cryptus	Cryptus spinosus	Gravenhorst, 1829
Arthropoda	Insecta	Hymenoptera	Ichneumonidae	Cryptinae	Cryptini	Cryptus	Cryptus spiralis	(Geoffroy, 1785)
Arthropoda	Insecta	Hymenoptera	Ichneumonidae	Cryptinae	Cryptini	Cryptus	Cryptus subquadratus	Thomson, 1873
Arthropoda	Insecta	Hymenoptera	Ichneumonidae	Cryptinae	Cryptini	Cryptus	Cryptus titubator	(Thunberg, 1824)
Arthropoda	Insecta	Hymenoptera	Ichneumonidae	Cryptinae	Cryptini	Cryptus	Cryptus triguttatus	Gravenhorst, 1829
Arthropoda	Insecta	Hymenoptera	Ichneumonidae	Cryptinae	Cryptini	Cryptus	Cryptus tuberculatus	Gravenhorst, 1829
Arthropoda	Insecta	Hymenoptera	Ichneumonidae	Cryptinae	Cryptini	Cryptus	Cryptus viduatorius	Fabricius, 1804
Arthropoda	Insecta	Hymenoptera	Ichneumonidae	Cryptinae	Cryptini	Enclisis	Enclisis alpicola	(Habermehl, 1926)
Arthropoda	Insecta	Hymenoptera	Ichneumonidae	Cryptinae	Cryptini	Enclisis	Enclisis macilenta	(Gravenhorst, 1829)
Arthropoda	Insecta	Hymenoptera	Ichneumonidae	Cryptinae	Cryptini	Enclisis	Enclisis ornaticeps	(Thomson, 1885)
Arthropoda	Insecta	Hymenoptera	Ichneumonidae	Cryptinae	Cryptini	Enclisis	Enclisis ruficeps	(Desvignes, 1856)
Arthropoda	Insecta	Hymenoptera	Ichneumonidae	Cryptinae	Cryptini	Enclisis	Enclisis schwarzi	Bordera & Hernández-Rodríguez, 2003
Arthropoda	Insecta	Hymenoptera	Ichneumonidae	Cryptinae	Cryptini	Enclisis	Enclisis vindex	(Tschek, 1871)
Arthropoda	Insecta	Hymenoptera	Ichneumonidae	Cryptinae	Cryptini	Gambrus	Gambrus amoenus	(Gravenhorst, 1829)
Arthropoda	Insecta	Hymenoptera	Ichneumonidae	Cryptinae	Cryptini	Gambrus	Gambrus aphrodite	(Heinrich, 1949)
Arthropoda	Insecta	Hymenoptera	Ichneumonidae	Cryptinae	Cryptini	Gambrus	Gambrus bipunctatus	(Tschek, 1872)
Arthropoda	Insecta	Hymenoptera	Ichneumonidae	Cryptinae	Cryptini	Gambrus	Gambrus carnifex	(Gravenhorst, 1829)
Arthropoda	Insecta	Hymenoptera	Ichneumonidae	Cryptinae	Cryptini	Gambrus	Gambrus conjungens	(Tschek, 1871)
Arthropoda	Insecta	Hymenoptera	Ichneumonidae	Cryptinae	Cryptini	Gambrus	Gambrus incubitor	(Linnaeus, 1758)
Arthropoda	Insecta	Hymenoptera	Ichneumonidae	Cryptinae	Cryptini	Gambrus	Gambrus ornatus	(Gravenhorst, 1829)
Arthropoda	Insecta	Hymenoptera	Ichneumonidae	Cryptinae	Cryptini	Gambrus	Gambrus tricolor	(Gravenhorst, 1829)
Arthropoda	Insecta	Hymenoptera	Ichneumonidae	Cryptinae	Cryptini	Helcostizus	Helcostizus restaurator	(Fabricius, 1775)
Arthropoda	Insecta	Hymenoptera	Ichneumonidae	Cryptinae	Cryptini	Hidryta	Hidryta fusiventris	(Thomson, 1873)
Arthropoda	Insecta	Hymenoptera	Ichneumonidae	Cryptinae	Cryptini	Hidryta	Hidryta nigricoxa	(Provancher, 1888)
Arthropoda	Insecta	Hymenoptera	Ichneumonidae	Cryptinae	Cryptini	Hidryta	Hidryta simplex	(Tschek, 1871)
Arthropoda	Insecta	Hymenoptera	Ichneumonidae	Cryptinae	Cryptini	Hidryta	Hidryta sordida	(Tschek, 1871)
Arthropoda	Insecta	Hymenoptera	Ichneumonidae	Cryptinae	Cryptini	Hoplocryptus	Hoplocryptus bellosus	(Curtis, 1837)
Arthropoda	Insecta	Hymenoptera	Ichneumonidae	Cryptinae	Cryptini	Hoplocryptus	Hoplocryptus besseianus	(Seyrig, 1926)
Arthropoda	Insecta	Hymenoptera	Ichneumonidae	Cryptinae	Cryptini	Hoplocryptus	Hoplocryptus bohemani	(Holmgren, 1856)
Arthropoda	Insecta	Hymenoptera	Ichneumonidae	Cryptinae	Cryptini	Hoplocryptus	Hoplocryptus centricolor	(Aubert, 1964)
Arthropoda	Insecta	Hymenoptera	Ichneumonidae	Cryptinae	Cryptini	Hoplocryptus	Hoplocryptus confector	(Gravenhorst, 1829)
Arthropoda	Insecta	Hymenoptera	Ichneumonidae	Cryptinae	Cryptini	Hoplocryptus	Hoplocryptus coxator	(Tschek, 1871)
Arthropoda	Insecta	Hymenoptera	Ichneumonidae	Cryptinae	Cryptini	Hoplocryptus	Hoplocryptus heliophilus	(Tschek, 1871)
Arthropoda	Insecta	Hymenoptera	Ichneumonidae	Cryptinae	Cryptini	Hoplocryptus	Hoplocryptus magrettii	(Kriechbaumer, 1893)
Arthropoda	Insecta	Hymenoptera	Ichneumonidae	Cryptinae	Cryptini	Hoplocryptus	Hoplocryptus melanocephalus	(Gravenhorst, 1829)
Arthropoda	Insecta	Hymenoptera	Ichneumonidae	Cryptinae	Cryptini	Hoplocryptus	Hoplocryptus murarius	(Börner, 1782)
Arthropoda	Insecta	Hymenoptera	Ichneumonidae	Cryptinae	Cryptini	Hoplocryptus	Hoplocryptus quadriguttatus	(Gravenhorst, 1829)
Arthropoda	Insecta	Hymenoptera	Ichneumonidae	Cryptinae	Cryptini	Idiolispa	Idiolispa analis	(Gravenhorst, 1807)
Arthropoda	Insecta	Hymenoptera	Ichneumonidae	Cryptinae	Cryptini	Idiolispa	Idiolispa grossa	(Gravenhorst, 1829)
Arthropoda	Insecta	Hymenoptera	Ichneumonidae	Cryptinae	Cryptini	Idiolispa	Idiolispa hungarica	(Szépligeti, 1916)
Arthropoda	Insecta	Hymenoptera	Ichneumonidae	Cryptinae	Cryptini	Idiolispa	Idiolispa obfuscator	(Villers, 1789)
Arthropoda	Insecta	Hymenoptera	Ichneumonidae	Cryptinae	Cryptini	Idiolispa	Idiolispa subalpina	(Schmiedeknecht, 1904)
Arthropoda	Insecta	Hymenoptera	Ichneumonidae	Cryptinae	Cryptini	Ischnus	Ischnus agitator	(Olivier, 1792)
Arthropoda	Insecta	Hymenoptera	Ichneumonidae	Cryptinae	Cryptini	Ischnus	Ischnus alternator	(Gravenhorst, 1829)
Arthropoda	Insecta	Hymenoptera	Ichneumonidae	Cryptinae	Cryptini	Ischnus	Ischnus inquisitorius	(Müller, 1776)
Arthropoda	Insecta	Hymenoptera	Ichneumonidae	Cryptinae	Cryptini	Ischnus	Ischnus migrator	(Fabricius, 1775)
Arthropoda	Insecta	Hymenoptera	Ichneumonidae	Cryptinae	Cryptini	Latibulus	Latibulus argiolus	(Rossi, 1790)
Arthropoda	Insecta	Hymenoptera	Ichneumonidae	Cryptinae	Cryptini	Listrognathus	Listrognathus compressicornis	(Gravenhorst, 1829)
Arthropoda	Insecta	Hymenoptera	Ichneumonidae	Cryptinae	Cryptini	Listrognathus	Listrognathus firmator	(Fabricius, 1798)
Arthropoda	Insecta	Hymenoptera	Ichneumonidae	Cryptinae	Cryptini	Listrognathus	Listrognathus furax	(Tschek, 1871)
Arthropoda	Insecta	Hymenoptera	Ichneumonidae	Cryptinae	Cryptini	Listrognathus	Listrognathus helveticae	(Horstmann, 1968)
Arthropoda	Insecta	Hymenoptera	Ichneumonidae	Cryptinae	Cryptini	Listrognathus	Listrognathus mactator	(Thunberg, 1824)
Arthropoda	Insecta	Hymenoptera	Ichneumonidae	Cryptinae	Cryptini	Listrognathus	Listrognathus mengersseni	Schmiedeknecht, 1905
Arthropoda	Insecta	Hymenoptera	Ichneumonidae	Cryptinae	Cryptini	Listrognathus	Listrognathus obnoxius	(Gravenhorst, 1829)
Arthropoda	Insecta	Hymenoptera	Ichneumonidae	Cryptinae	Cryptini	Listrognathus	Listrognathus pubescens	(Fonscolombe, 1850)
Arthropoda	Insecta	Hymenoptera	Ichneumonidae	Cryptinae	Cryptini	Meringopus	Meringopus attentorius	(Panzer, 1804)
Arthropoda	Insecta	Hymenoptera	Ichneumonidae	Cryptinae	Cryptini	Meringopus	Meringopus calescens	(Gravenhorst, 1829)
Arthropoda	Insecta	Hymenoptera	Ichneumonidae	Cryptinae	Cryptini	Meringopus	Meringopus fuscescens	(Gmelin, 1790)
Arthropoda	Insecta	Hymenoptera	Ichneumonidae	Cryptinae	Cryptini	Meringopus	Meringopus nigerrimus	(Fonscolombe, 1850)
Arthropoda	Insecta	Hymenoptera	Ichneumonidae	Cryptinae	Cryptini	Meringopus	Meringopus pseudonymus	(Tschek, 1872)
Arthropoda	Insecta	Hymenoptera	Ichneumonidae	Cryptinae	Cryptini	Meringopus	Meringopus titillator	(Linnaeus, 1758)
Arthropoda	Insecta	Hymenoptera	Ichneumonidae	Cryptinae	Cryptini	Meringopus	Meringopus turanus	(Habermehl, 1918)
Arthropoda	Insecta	Hymenoptera	Ichneumonidae	Cryptinae	Cryptini	Mesostenus	Mesostenus albinotatus	Gravenhorst, 1829
Arthropoda	Insecta	Hymenoptera	Ichneumonidae	Cryptinae	Cryptini	Mesostenus	Mesostenus dentifer	Thomson, 1896
Arthropoda	Insecta	Hymenoptera	Ichneumonidae	Cryptinae	Cryptini	Mesostenus	Mesostenus funebris	Gravenhorst, 1829
Arthropoda	Insecta	Hymenoptera	Ichneumonidae	Cryptinae	Cryptini	Mesostenus	Mesostenus transfuga	Gravenhorst, 1829
Arthropoda	Insecta	Hymenoptera	Ichneumonidae	Cryptinae	Cryptini	Myrmeleonostenus	Myrmeleonostenus italicus	(Gravenhorst, 1829)
Arthropoda	Insecta	Hymenoptera	Ichneumonidae	Cryptinae	Cryptini	Nematopodius	Nematopodius debilis	(Ratzeburg, 1852)
Arthropoda	Insecta	Hymenoptera	Ichneumonidae	Cryptinae	Cryptini	Nematopodius	Nematopodius formosus	Gravenhorst, 1829
Arthropoda	Insecta	Hymenoptera	Ichneumonidae	Cryptinae	Cryptini	Nippocryptus	Nippocryptus alutaceus	(Tschek, 1871)
Arthropoda	Insecta	Hymenoptera	Ichneumonidae	Cryptinae	Cryptini	Nippocryptus	Nippocryptus quadriannulatus	(Gravenhorst, 1829)
Arthropoda	Insecta	Hymenoptera	Ichneumonidae	Cryptinae	Cryptini	Nippocryptus	Nippocryptus vittatorius	(Jurine, 1807)
Arthropoda	Insecta	Hymenoptera	Ichneumonidae	Cryptinae	Cryptini	Picardiella	Picardiella melanoleuca	(Gravenhorst, 1829)
Arthropoda	Insecta	Hymenoptera	Ichneumonidae	Cryptinae	Cryptini	Pycnocryptodes	Pycnocryptodes insinuator	(Gravenhorst, 1829)
Arthropoda	Insecta	Hymenoptera	Ichneumonidae	Cryptinae	Cryptini	Schreineria	Schreineria cingulipes	(Förster, 1888)
Arthropoda	Insecta	Hymenoptera	Ichneumonidae	Cryptinae	Cryptini	Schreineria	Schreineria populnea	(Giraud, 1872)
Arthropoda	Insecta	Hymenoptera	Ichneumonidae	Cryptinae	Cryptini	Sphecophaga	Sphecophaga vesparum	(Curtis, 1828)
Arthropoda	Insecta	Hymenoptera	Ichneumonidae	Cryptinae	Cryptini	Stenarella	Stenarella domator	(Poda, 1761)
Arthropoda	Insecta	Hymenoptera	Ichneumonidae	Cryptinae	Cryptini	Thrybius	Thrybius brevispina	(Thomson, 1896)
Arthropoda	Insecta	Hymenoptera	Ichneumonidae	Cryptinae	Cryptini	Thrybius	Thrybius praedator	(Rossi, 1792)
Arthropoda	Insecta	Hymenoptera	Ichneumonidae	Cryptinae	Cryptini	Trychosis	Trychosis ambigua	(Tschek, 1871)
Arthropoda	Insecta	Hymenoptera	Ichneumonidae	Cryptinae	Cryptini	Trychosis	Trychosis atripes	(Gravenhorst, 1829)
Arthropoda	Insecta	Hymenoptera	Ichneumonidae	Cryptinae	Cryptini	Trychosis	Trychosis gradaria	(Tschek, 1871)
Arthropoda	Insecta	Hymenoptera	Ichneumonidae	Cryptinae	Cryptini	Trychosis	Trychosis ingrata	(Tschek, 1871)
Arthropoda	Insecta	Hymenoptera	Ichneumonidae	Cryptinae	Cryptini	Trychosis	Trychosis insularis	Rossem, 1989
Arthropoda	Insecta	Hymenoptera	Ichneumonidae	Cryptinae	Cryptini	Trychosis	Trychosis legator	(Thunberg, 1824)
Arthropoda	Insecta	Hymenoptera	Ichneumonidae	Cryptinae	Cryptini	Trychosis	Trychosis neglecta	(Tschek, 1871)
Arthropoda	Insecta	Hymenoptera	Ichneumonidae	Cryptinae	Cryptini	Trychosis	Trychosis pauper	(Tschek, 1871)
Arthropoda	Insecta	Hymenoptera	Ichneumonidae	Cryptinae	Cryptini	Trychosis	Trychosis picta	(Thomson, 1873)
Arthropoda	Insecta	Hymenoptera	Ichneumonidae	Cryptinae	Cryptini	Trychosis	Trychosis tristator	(Tschek, 1871)
Arthropoda	Insecta	Hymenoptera	Ichneumonidae	Cryptinae	Cryptini	Xylophrurus	Xylophrurus augustus	(Dalman, 1823)
Arthropoda	Insecta	Hymenoptera	Ichneumonidae	Cryptinae	Cryptini	Xylophrurus	Xylophrurus coraebi	(Thomson, 1885)
Arthropoda	Insecta	Hymenoptera	Ichneumonidae	Cryptinae	Cryptini	Xylophrurus	Xylophrurus lancifer	(Gravenhorst, 1829)
Arthropoda	Insecta	Hymenoptera	Ichneumonidae	Cryptinae	Cryptini	Xylophrurus	Xylophrurus tumidus	(Desvignes, 1856)
Arthropoda	Insecta	Hymenoptera	Ichneumonidae	Ctenopelmatinae	Chrionotini	Olethrodotis	Olethrodotis modesta	(Gravenhorst, 1829)
Arthropoda	Insecta	Hymenoptera	Ichneumonidae	Ctenopelmatinae	Ctenopelmatini	Ctenopelma	Ctenopelma boreale	Holmgren, 1857
Arthropoda	Insecta	Hymenoptera	Ichneumonidae	Ctenopelmatinae	Ctenopelmatini	Ctenopelma	Ctenopelma boreoalpinum	Heinrich, 1949
Arthropoda	Insecta	Hymenoptera	Ichneumonidae	Ctenopelmatinae	Ctenopelmatini	Ctenopelma	Ctenopelma elegantulum	Schmiedeknecht, 1913
Arthropoda	Insecta	Hymenoptera	Ichneumonidae	Ctenopelmatinae	Ctenopelmatini	Ctenopelma	Ctenopelma luciferum	(Gravenhorst, 1829)
Arthropoda	Insecta	Hymenoptera	Ichneumonidae	Ctenopelmatinae	Ctenopelmatini	Ctenopelma	Ctenopelma nigripenne	(Gravenhorst, 1829)
Arthropoda	Insecta	Hymenoptera	Ichneumonidae	Ctenopelmatinae	Ctenopelmatini	Ctenopelma	Ctenopelma nigrum	Holmgren, 1857
Arthropoda	Insecta	Hymenoptera	Ichneumonidae	Ctenopelmatinae	Ctenopelmatini	Ctenopelma	Ctenopelma ruficorne	Holmgren, 1857
Arthropoda	Insecta	Hymenoptera	Ichneumonidae	Ctenopelmatinae	Ctenopelmatini	Ctenopelma	Ctenopelma rufiventre	(Gravenhorst, 1829)
Arthropoda	Insecta	Hymenoptera	Ichneumonidae	Ctenopelmatinae	Ctenopelmatini	Ctenopelma	Ctenopelma tomentosum	(Desvignes, 1856)
Arthropoda	Insecta	Hymenoptera	Ichneumonidae	Ctenopelmatinae	Ctenopelmatini	Homaspis	Homaspis alpigena	(Strobl, 1903)
Arthropoda	Insecta	Hymenoptera	Ichneumonidae	Ctenopelmatinae	Ctenopelmatini	Homaspis	Homaspis analis	(Holmgren, 1857)
Arthropoda	Insecta	Hymenoptera	Ichneumonidae	Ctenopelmatinae	Ctenopelmatini	Homaspis	Homaspis kraussei	Ulbricht, 1921
Arthropoda	Insecta	Hymenoptera	Ichneumonidae	Ctenopelmatinae	Ctenopelmatini	Homaspis	Homaspis narrator	(Gravenhorst, 1829)
Arthropoda	Insecta	Hymenoptera	Ichneumonidae	Ctenopelmatinae	Ctenopelmatini	Homaspis	Homaspis rufina	(Gravenhorst, 1829)
Arthropoda	Insecta	Hymenoptera	Ichneumonidae	Ctenopelmatinae	Ctenopelmatini	Homaspis	Homaspis subalpina	Schmiedeknecht, 1913
Arthropoda	Insecta	Hymenoptera	Ichneumonidae	Ctenopelmatinae	Ctenopelmatini	Homaspis	Homaspis varicolor	(Thomson, 1894)
Arthropoda	Insecta	Hymenoptera	Ichneumonidae	Ctenopelmatinae	Ctenopelmatini	Notopygus	Notopygus emarginatus	Holmgren, 1857
Arthropoda	Insecta	Hymenoptera	Ichneumonidae	Ctenopelmatinae	Ctenopelmatini	Notopygus	Notopygus flavicornis	Holmgren, 1857
Arthropoda	Insecta	Hymenoptera	Ichneumonidae	Ctenopelmatinae	Ctenopelmatini	Notopygus	Notopygus insignis	Kriechbaumer, 1891
Arthropoda	Insecta	Hymenoptera	Ichneumonidae	Ctenopelmatinae	Ctenopelmatini	Notopygus	Notopygus minkii	Vollenhoven, 1878
Arthropoda	Insecta	Hymenoptera	Ichneumonidae	Ctenopelmatinae	Ctenopelmatini	Notopygus	Notopygus nigricornis	Kriechbaumer, 1891
Arthropoda	Insecta	Hymenoptera	Ichneumonidae	Ctenopelmatinae	Ctenopelmatini	Xenoschesis	Xenoschesis aethiops	(Gravenhorst, 1829)
Arthropoda	Insecta	Hymenoptera	Ichneumonidae	Ctenopelmatinae	Ctenopelmatini	Xenoschesis	Xenoschesis flavopicta	(Strobl, 1903)
Arthropoda	Insecta	Hymenoptera	Ichneumonidae	Ctenopelmatinae	Ctenopelmatini	Xenoschesis	Xenoschesis fulvicornis	(Kriechbaumer, 1891)
Arthropoda	Insecta	Hymenoptera	Ichneumonidae	Ctenopelmatinae	Ctenopelmatini	Xenoschesis	Xenoschesis fulvipes	(Gravenhorst, 1829)
Arthropoda	Insecta	Hymenoptera	Ichneumonidae	Ctenopelmatinae	Ctenopelmatini	Xenoschesis	Xenoschesis mordax	(Thomson, 1883)
Arthropoda	Insecta	Hymenoptera	Ichneumonidae	Ctenopelmatinae	Ctenopelmatini	Xenoschesis	Xenoschesis nigricoxa	(Strobl, 1903)
Arthropoda	Insecta	Hymenoptera	Ichneumonidae	Ctenopelmatinae	Ctenopelmatini	Xenoschesis	Xenoschesis ustulata	(Desvignes, 1856)
Arthropoda	Insecta	Hymenoptera	Ichneumonidae	Ctenopelmatinae	Euryproctini	Anisotacrus	Anisotacrus bipunctatus	(Gravenhorst, 1829)
Arthropoda	Insecta	Hymenoptera	Ichneumonidae	Ctenopelmatinae	Euryproctini	Anisotacrus	Anisotacrus xanthostigma	(Gravenhorst, 1829)
Arthropoda	Insecta	Hymenoptera	Ichneumonidae	Ctenopelmatinae	Euryproctini	Euryproctus	Euryproctus alpinus	Holmgren, 1857
Arthropoda	Insecta	Hymenoptera	Ichneumonidae	Ctenopelmatinae	Euryproctini	Euryproctus	Euryproctus annulatus	(Gravenhorst, 1829)
Arthropoda	Insecta	Hymenoptera	Ichneumonidae	Ctenopelmatinae	Euryproctini	Euryproctus	Euryproctus bivinctus	Holmgren, 1857
Arthropoda	Insecta	Hymenoptera	Ichneumonidae	Ctenopelmatinae	Euryproctini	Euryproctus	Euryproctus crassicornis	Thomson, 1889
Arthropoda	Insecta	Hymenoptera	Ichneumonidae	Ctenopelmatinae	Euryproctini	Euryproctus	Euryproctus geniculosus	(Gravenhorst, 1829)
Arthropoda	Insecta	Hymenoptera	Ichneumonidae	Ctenopelmatinae	Euryproctini	Euryproctus	Euryproctus inferus	Thomson, 1889
Arthropoda	Insecta	Hymenoptera	Ichneumonidae	Ctenopelmatinae	Euryproctini	Euryproctus	Euryproctus luteicornis	(Gravenhorst, 1829)
Arthropoda	Insecta	Hymenoptera	Ichneumonidae	Ctenopelmatinae	Euryproctini	Euryproctus	Euryproctus mundus	(Gravenhorst, 1820)
Arthropoda	Insecta	Hymenoptera	Ichneumonidae	Ctenopelmatinae	Euryproctini	Euryproctus	Euryproctus nemoralis	(Geoffroy, 1785)
Arthropoda	Insecta	Hymenoptera	Ichneumonidae	Ctenopelmatinae	Euryproctini	Euryproctus	Euryproctus plantator	(Thunberg, 1824)
Arthropoda	Insecta	Hymenoptera	Ichneumonidae	Ctenopelmatinae	Euryproctini	Euryproctus	Euryproctus ratzeburgi	(Gorski, 1852)
Arthropoda	Insecta	Hymenoptera	Ichneumonidae	Ctenopelmatinae	Euryproctini	Gunomeria	Gunomeria macrodactylus	(Holmgren, 1856)
Arthropoda	Insecta	Hymenoptera	Ichneumonidae	Ctenopelmatinae	Euryproctini	Gunomeria	Gunomeria sordida	(Gravenhorst, 1829)
Arthropoda	Insecta	Hymenoptera	Ichneumonidae	Ctenopelmatinae	Euryproctini	Hadrodactylus	Hadrodactylus bidentulus	Thomson, 1883
Arthropoda	Insecta	Hymenoptera	Ichneumonidae	Ctenopelmatinae	Euryproctini	Hadrodactylus	Hadrodactylus confusus	(Holmgren, 1858)
Arthropoda	Insecta	Hymenoptera	Ichneumonidae	Ctenopelmatinae	Euryproctini	Hadrodactylus	Hadrodactylus faciator	(Thunberg, 1824)
Arthropoda	Insecta	Hymenoptera	Ichneumonidae	Ctenopelmatinae	Euryproctini	Hadrodactylus	Hadrodactylus femoralis	(Holmgren, 1857)
Arthropoda	Insecta	Hymenoptera	Ichneumonidae	Ctenopelmatinae	Euryproctini	Hadrodactylus	Hadrodactylus flavofacialis	Horstmann, 2000
Arthropoda	Insecta	Hymenoptera	Ichneumonidae	Ctenopelmatinae	Euryproctini	Hadrodactylus	Hadrodactylus fugax	(Gravenhorst, 1829)
Arthropoda	Insecta	Hymenoptera	Ichneumonidae	Ctenopelmatinae	Euryproctini	Hadrodactylus	Hadrodactylus genalis	Thomson, 1883
Arthropoda	Insecta	Hymenoptera	Ichneumonidae	Ctenopelmatinae	Euryproctini	Hadrodactylus	Hadrodactylus gracilipes	Thomson, 1883
Arthropoda	Insecta	Hymenoptera	Ichneumonidae	Ctenopelmatinae	Euryproctini	Hadrodactylus	Hadrodactylus gracilis	(Stephens, 1835)
Arthropoda	Insecta	Hymenoptera	Ichneumonidae	Ctenopelmatinae	Euryproctini	Hadrodactylus	Hadrodactylus graminicola	Idar, 1979
Arthropoda	Insecta	Hymenoptera	Ichneumonidae	Ctenopelmatinae	Euryproctini	Hadrodactylus	Hadrodactylus indefessus	(Gravenhorst, 1820)
Arthropoda	Insecta	Hymenoptera	Ichneumonidae	Ctenopelmatinae	Euryproctini	Hadrodactylus	Hadrodactylus insignis	Kriechbaumer, 1891
Arthropoda	Insecta	Hymenoptera	Ichneumonidae	Ctenopelmatinae	Euryproctini	Hadrodactylus	Hadrodactylus larvatus	Kriechbaumer, 1891
Arthropoda	Insecta	Hymenoptera	Ichneumonidae	Ctenopelmatinae	Euryproctini	Hadrodactylus	Hadrodactylus nigrifemur	Thomson, 1883
Arthropoda	Insecta	Hymenoptera	Ichneumonidae	Ctenopelmatinae	Euryproctini	Hadrodactylus	Hadrodactylus paludicola	(Holmgren, 1856)
Arthropoda	Insecta	Hymenoptera	Ichneumonidae	Ctenopelmatinae	Euryproctini	Hadrodactylus	Hadrodactylus rectinervis	Roman, 1909
Arthropoda	Insecta	Hymenoptera	Ichneumonidae	Ctenopelmatinae	Euryproctini	Hadrodactylus	Hadrodactylus semirufus	(Holmgren, 1858)
Arthropoda	Insecta	Hymenoptera	Ichneumonidae	Ctenopelmatinae	Euryproctini	Hadrodactylus	Hadrodactylus spiraculator	Idar, 1979
Arthropoda	Insecta	Hymenoptera	Ichneumonidae	Ctenopelmatinae	Euryproctini	Hadrodactylus	Hadrodactylus tiphae	(Geoffroy, 1785)
Arthropoda	Insecta	Hymenoptera	Ichneumonidae	Ctenopelmatinae	Euryproctini	Hadrodactylus	Hadrodactylus villosulus	Thomson, 1883
Arthropoda	Insecta	Hymenoptera	Ichneumonidae	Ctenopelmatinae	Euryproctini	Hadrodactylus	Hadrodactylus vulneratus	(Zetterstedt, 1838)
Arthropoda	Insecta	Hymenoptera	Ichneumonidae	Ctenopelmatinae	Euryproctini	Hypamblys	Hypamblys albopictus	(Gravenhorst, 1829)
Arthropoda	Insecta	Hymenoptera	Ichneumonidae	Ctenopelmatinae	Euryproctini	Hypamblys	Hypamblys romani	Habermehl, 1925
Arthropoda	Insecta	Hymenoptera	Ichneumonidae	Ctenopelmatinae	Euryproctini	Hypsantyx	Hypsantyx lituratoria	(Linnaeus, 1761)
Arthropoda	Insecta	Hymenoptera	Ichneumonidae	Ctenopelmatinae	Euryproctini	Mesoleptidea	Mesoleptidea cingulata	(Gravenhorst, 1829)
Arthropoda	Insecta	Hymenoptera	Ichneumonidae	Ctenopelmatinae	Euryproctini	Mesoleptidea	Mesoleptidea hilaris	(Gravenhorst, 1829)
Arthropoda	Insecta	Hymenoptera	Ichneumonidae	Ctenopelmatinae	Euryproctini	Mesoleptidea	Mesoleptidea hohenwartensis	(Schmiedeknecht, 1913)
Arthropoda	Insecta	Hymenoptera	Ichneumonidae	Ctenopelmatinae	Euryproctini	Mesoleptidea	Mesoleptidea prosoleuca	(Gravenhorst, 1820)
Arthropoda	Insecta	Hymenoptera	Ichneumonidae	Ctenopelmatinae	Euryproctini	Mesoleptidea	Mesoleptidea stalii	(Holmgren, 1858)
Arthropoda	Insecta	Hymenoptera	Ichneumonidae	Ctenopelmatinae	Euryproctini	Mesoleptidea	Mesoleptidea sylvatica	(Woldstedt, 1874)
Arthropoda	Insecta	Hymenoptera	Ichneumonidae	Ctenopelmatinae	Euryproctini	Occapes	Occapes distinctor	Aubert, 1998
Arthropoda	Insecta	Hymenoptera	Ichneumonidae	Ctenopelmatinae	Euryproctini	Occapes	Occapes selandriae	(Brischke, 1878)
Arthropoda	Insecta	Hymenoptera	Ichneumonidae	Ctenopelmatinae	Euryproctini	Pantorhaestes	Pantorhaestes xanthostomus	(Gravenhorst, 1829)
Arthropoda	Insecta	Hymenoptera	Ichneumonidae	Ctenopelmatinae	Euryproctini	Phobetes	Phobetes atomator	(Müller, 1776)
Arthropoda	Insecta	Hymenoptera	Ichneumonidae	Ctenopelmatinae	Euryproctini	Phobetes	Phobetes atricoxator	Aubert, 2007
Arthropoda	Insecta	Hymenoptera	Ichneumonidae	Ctenopelmatinae	Euryproctini	Phobetes	Phobetes cerinostomus	(Gravenhorst, 1829)
Arthropoda	Insecta	Hymenoptera	Ichneumonidae	Ctenopelmatinae	Euryproctini	Phobetes	Phobetes chrysostomus	(Gravenhorst, 1820)
Arthropoda	Insecta	Hymenoptera	Ichneumonidae	Ctenopelmatinae	Euryproctini	Phobetes	Phobetes femorator	(Thomson, 1894)
Arthropoda	Insecta	Hymenoptera	Ichneumonidae	Ctenopelmatinae	Euryproctini	Phobetes	Phobetes fuscicornis	(Holmgren, 1856)
Arthropoda	Insecta	Hymenoptera	Ichneumonidae	Ctenopelmatinae	Euryproctini	Phobetes	Phobetes leptocerus	(Gravenhorst, 1820)
Arthropoda	Insecta	Hymenoptera	Ichneumonidae	Ctenopelmatinae	Euryproctini	Phobetes	Phobetes nigriceps	(Gravenhorst, 1829)
Arthropoda	Insecta	Hymenoptera	Ichneumonidae	Ctenopelmatinae	Euryproctini	Phobetes	Phobetes rufipes	(Thomson, 1894)
Arthropoda	Insecta	Hymenoptera	Ichneumonidae	Ctenopelmatinae	Euryproctini	Syndipnus	Syndipnus alutaceus	(Holmgren, 1857)
Arthropoda	Insecta	Hymenoptera	Ichneumonidae	Ctenopelmatinae	Euryproctini	Syndipnus	Syndipnus atricornis	(Thomson, 1883)
Arthropoda	Insecta	Hymenoptera	Ichneumonidae	Ctenopelmatinae	Euryproctini	Syndipnus	Syndipnus conformis	(Holmgren, 1857)
Arthropoda	Insecta	Hymenoptera	Ichneumonidae	Ctenopelmatinae	Euryproctini	Syndipnus	Syndipnus lateralis	(Gravenhorst, 1829)
Arthropoda	Insecta	Hymenoptera	Ichneumonidae	Ctenopelmatinae	Euryproctini	Syndipnus	Syndipnus lilianeator	Aubert, 2007
Arthropoda	Insecta	Hymenoptera	Ichneumonidae	Ctenopelmatinae	Euryproctini	Syndipnus	Syndipnus polyblastoides	(Kriechbaumer, 1897)
Arthropoda	Insecta	Hymenoptera	Ichneumonidae	Ctenopelmatinae	Euryproctini	Syndipnus	Syndipnus sternoleucus	(Gravenhorst, 1829)
Arthropoda	Insecta	Hymenoptera	Ichneumonidae	Ctenopelmatinae	Euryproctini	Synodites	Synodites breviusculus	(Fonscolombe, 1849)
Arthropoda	Insecta	Hymenoptera	Ichneumonidae	Ctenopelmatinae	Euryproctini	Synodites	Synodites carinatus	(Holmgren, 1857)
Arthropoda	Insecta	Hymenoptera	Ichneumonidae	Ctenopelmatinae	Euryproctini	Synodites	Synodites decipiens	(Woldstedt, 1877)
Arthropoda	Insecta	Hymenoptera	Ichneumonidae	Ctenopelmatinae	Euryproctini	Synodites	Synodites genalis	(Habermehl, 1925)
Arthropoda	Insecta	Hymenoptera	Ichneumonidae	Ctenopelmatinae	Euryproctini	Synodites	Synodites humeralis	(Gravenhorst, 1829)
Arthropoda	Insecta	Hymenoptera	Ichneumonidae	Ctenopelmatinae	Euryproctini	Synodites	Synodites lineiger	(Thomson, 1894)
Arthropoda	Insecta	Hymenoptera	Ichneumonidae	Ctenopelmatinae	Euryproctini	Synodites	Synodites notatus	(Gravenhorst, 1829)
Arthropoda	Insecta	Hymenoptera	Ichneumonidae	Ctenopelmatinae	Euryproctini	Synodites	Synodites orbitalis	(Thomson, 1894)
Arthropoda	Insecta	Hymenoptera	Ichneumonidae	Ctenopelmatinae	Euryproctini	Synomelix	Synomelix albipes	(Gravenhorst, 1829)
Arthropoda	Insecta	Hymenoptera	Ichneumonidae	Ctenopelmatinae	Euryproctini	Synomelix	Synomelix faciator	Idar, 1983
Arthropoda	Insecta	Hymenoptera	Ichneumonidae	Ctenopelmatinae	Euryproctini	Synomelix	Synomelix perfida	(Woldstedt, 1874)
Arthropoda	Insecta	Hymenoptera	Ichneumonidae	Ctenopelmatinae	Euryproctini	Zemiophora	Zemiophora scutulata	(Hartig, 1838)
Arthropoda	Insecta	Hymenoptera	Ichneumonidae	Ctenopelmatinae	Mesoleiini	Alcochera	Alcochera flavipes	(Gravenhorst, 1829)
Arthropoda	Insecta	Hymenoptera	Ichneumonidae	Ctenopelmatinae	Mesoleiini	Alexeter	Alexeter albilabris	(Thomson, 1894)
Arthropoda	Insecta	Hymenoptera	Ichneumonidae	Ctenopelmatinae	Mesoleiini	Alexeter	Alexeter clavator	(Müller, 1776)
Arthropoda	Insecta	Hymenoptera	Ichneumonidae	Ctenopelmatinae	Mesoleiini	Alexeter	Alexeter coxalis	(Brischke, 1871)
Arthropoda	Insecta	Hymenoptera	Ichneumonidae	Ctenopelmatinae	Mesoleiini	Alexeter	Alexeter fallax	(Holmgren, 1857)
Arthropoda	Insecta	Hymenoptera	Ichneumonidae	Ctenopelmatinae	Mesoleiini	Alexeter	Alexeter gracilentus	(Holmgren, 1857)
Arthropoda	Insecta	Hymenoptera	Ichneumonidae	Ctenopelmatinae	Mesoleiini	Alexeter	Alexeter hypargyrici	(Hinz, 1996)
Arthropoda	Insecta	Hymenoptera	Ichneumonidae	Ctenopelmatinae	Mesoleiini	Alexeter	Alexeter improbus	(Holmgren, 1857)
Arthropoda	Insecta	Hymenoptera	Ichneumonidae	Ctenopelmatinae	Mesoleiini	Alexeter	Alexeter multicolor	(Gravenhorst, 1829)
Arthropoda	Insecta	Hymenoptera	Ichneumonidae	Ctenopelmatinae	Mesoleiini	Alexeter	Alexeter nebulator	(Thunberg, 1824)
Arthropoda	Insecta	Hymenoptera	Ichneumonidae	Ctenopelmatinae	Mesoleiini	Alexeter	Alexeter niger	(Gravenhorst, 1829)
Arthropoda	Insecta	Hymenoptera	Ichneumonidae	Ctenopelmatinae	Mesoleiini	Alexeter	Alexeter rapinator	(Gravenhorst, 1829)
Arthropoda	Insecta	Hymenoptera	Ichneumonidae	Ctenopelmatinae	Mesoleiini	Alexeter	Alexeter segmentarius	(Fabricius, 1787)
Arthropoda	Insecta	Hymenoptera	Ichneumonidae	Ctenopelmatinae	Mesoleiini	Anoncus	Anoncus bipunctatus	(Brischke, 1892)
Arthropoda	Insecta	Hymenoptera	Ichneumonidae	Ctenopelmatinae	Mesoleiini	Anoncus	Anoncus femorator	(Thomson, 1894)
Arthropoda	Insecta	Hymenoptera	Ichneumonidae	Ctenopelmatinae	Mesoleiini	Anoncus	Anoncus gracilicornis	(Holmgren, 1857)
Arthropoda	Insecta	Hymenoptera	Ichneumonidae	Ctenopelmatinae	Mesoleiini	Anoncus	Anoncus linitus	(Holmgren, 1857)
Arthropoda	Insecta	Hymenoptera	Ichneumonidae	Ctenopelmatinae	Mesoleiini	Anoncus	Anoncus loderi	(Hinz, 1961)
Arthropoda	Insecta	Hymenoptera	Ichneumonidae	Ctenopelmatinae	Mesoleiini	Anoncus	Anoncus marginellus	(Gravenhorst, 1829)
Arthropoda	Insecta	Hymenoptera	Ichneumonidae	Ctenopelmatinae	Mesoleiini	Anoncus	Anoncus stipator	(Holmgren, 1857)
Arthropoda	Insecta	Hymenoptera	Ichneumonidae	Ctenopelmatinae	Mesoleiini	Arbelus	Arbelus sanguinipes	(Thomson, 1894)
Arthropoda	Insecta	Hymenoptera	Ichneumonidae	Ctenopelmatinae	Mesoleiini	Azelus	Azelus erythropalpus	(Gmelin, 1790)
Arthropoda	Insecta	Hymenoptera	Ichneumonidae	Ctenopelmatinae	Mesoleiini	Barytarbes	Barytarbes adpropinquator	(Gravenhorst, 1829)
Arthropoda	Insecta	Hymenoptera	Ichneumonidae	Ctenopelmatinae	Mesoleiini	Barytarbes	Barytarbes annulipes	(Thomson, 1883)
Arthropoda	Insecta	Hymenoptera	Ichneumonidae	Ctenopelmatinae	Mesoleiini	Barytarbes	Barytarbes colon	(Gravenhorst, 1829)
Arthropoda	Insecta	Hymenoptera	Ichneumonidae	Ctenopelmatinae	Mesoleiini	Barytarbes	Barytarbes flavicornis	(Thomson, 1892)
Arthropoda	Insecta	Hymenoptera	Ichneumonidae	Ctenopelmatinae	Mesoleiini	Barytarbes	Barytarbes flavoscutellatus	(Thomson, 1892)
Arthropoda	Insecta	Hymenoptera	Ichneumonidae	Ctenopelmatinae	Mesoleiini	Barytarbes	Barytarbes hilarellus	Schmiedeknecht, 1914
Arthropoda	Insecta	Hymenoptera	Ichneumonidae	Ctenopelmatinae	Mesoleiini	Barytarbes	Barytarbes laeviusculus	(Thomson, 1883)
Arthropoda	Insecta	Hymenoptera	Ichneumonidae	Ctenopelmatinae	Mesoleiini	Barytarbes	Barytarbes pectoralis	(Brischke, 1871)
Arthropoda	Insecta	Hymenoptera	Ichneumonidae	Ctenopelmatinae	Mesoleiini	Barytarbes	Barytarbes superbus	Schmiedeknecht, 1914
Arthropoda	Insecta	Hymenoptera	Ichneumonidae	Ctenopelmatinae	Mesoleiini	Campodorus	Campodorus alticola	(Holmgren, 1857)
Arthropoda	Insecta	Hymenoptera	Ichneumonidae	Ctenopelmatinae	Mesoleiini	Campodorus	Campodorus amictus	(Holmgren, 1857)
Arthropoda	Insecta	Hymenoptera	Ichneumonidae	Ctenopelmatinae	Mesoleiini	Campodorus	Campodorus astutus	(Holmgren, 1876)
Arthropoda	Insecta	Hymenoptera	Ichneumonidae	Ctenopelmatinae	Mesoleiini	Campodorus	Campodorus autumnalis	(Woldstedt, 1874)
Arthropoda	Insecta	Hymenoptera	Ichneumonidae	Ctenopelmatinae	Mesoleiini	Campodorus	Campodorus boreator	Kasparyan, 2006
Arthropoda	Insecta	Hymenoptera	Ichneumonidae	Ctenopelmatinae	Mesoleiini	Campodorus	Campodorus caligatus	(Gravenhorst, 1829)
Arthropoda	Insecta	Hymenoptera	Ichneumonidae	Ctenopelmatinae	Mesoleiini	Campodorus	Campodorus ciliator	Kasparyan, 2006
Arthropoda	Insecta	Hymenoptera	Ichneumonidae	Ctenopelmatinae	Mesoleiini	Campodorus	Campodorus clypealis	(Thomson, 1894)
Arthropoda	Insecta	Hymenoptera	Ichneumonidae	Ctenopelmatinae	Mesoleiini	Campodorus	Campodorus deletus	(Thomson, 1894)
Arthropoda	Insecta	Hymenoptera	Ichneumonidae	Ctenopelmatinae	Mesoleiini	Campodorus	Campodorus difformis	(Holmgren, 1876)
Arthropoda	Insecta	Hymenoptera	Ichneumonidae	Ctenopelmatinae	Mesoleiini	Campodorus	Campodorus dorsalis	(Gravenhorst, 1829)
Arthropoda	Insecta	Hymenoptera	Ichneumonidae	Ctenopelmatinae	Mesoleiini	Campodorus	Campodorus elegans	(Parfitt, 1882)
Arthropoda	Insecta	Hymenoptera	Ichneumonidae	Ctenopelmatinae	Mesoleiini	Campodorus	Campodorus epachthoides	(Heinrich, 1952)
Arthropoda	Insecta	Hymenoptera	Ichneumonidae	Ctenopelmatinae	Mesoleiini	Campodorus	Campodorus flavicinctus	(Gmelin, 1790)
Arthropoda	Insecta	Hymenoptera	Ichneumonidae	Ctenopelmatinae	Mesoleiini	Campodorus	Campodorus formosus	(Gravenhorst, 1829)
Arthropoda	Insecta	Hymenoptera	Ichneumonidae	Ctenopelmatinae	Mesoleiini	Campodorus	Campodorus fuscotrochanteratus	(Strobl, 1903)
Arthropoda	Insecta	Hymenoptera	Ichneumonidae	Ctenopelmatinae	Mesoleiini	Campodorus	Campodorus gallicus	(Thomson, 1894)
Arthropoda	Insecta	Hymenoptera	Ichneumonidae	Ctenopelmatinae	Mesoleiini	Campodorus	Campodorus glyptus	(Thomson, 1894)
Arthropoda	Insecta	Hymenoptera	Ichneumonidae	Ctenopelmatinae	Mesoleiini	Campodorus	Campodorus haematodes	(Gravenhorst, 1829)
Arthropoda	Insecta	Hymenoptera	Ichneumonidae	Ctenopelmatinae	Mesoleiini	Campodorus	Campodorus hamulus	(Gravenhorst, 1829)
Arthropoda	Insecta	Hymenoptera	Ichneumonidae	Ctenopelmatinae	Mesoleiini	Campodorus	Campodorus holmgreni	(Schmiedeknecht, 1924)
Arthropoda	Insecta	Hymenoptera	Ichneumonidae	Ctenopelmatinae	Mesoleiini	Campodorus	Campodorus ignavus	(Holmgren, 1857)
Arthropoda	Insecta	Hymenoptera	Ichneumonidae	Ctenopelmatinae	Mesoleiini	Campodorus	Campodorus incidens	(Thomson, 1894)
Arthropoda	Insecta	Hymenoptera	Ichneumonidae	Ctenopelmatinae	Mesoleiini	Campodorus	Campodorus infidus	(Woldstedt, 1877)
Arthropoda	Insecta	Hymenoptera	Ichneumonidae	Ctenopelmatinae	Mesoleiini	Campodorus	Campodorus laevipectus	(Thomson, 1894)
Arthropoda	Insecta	Hymenoptera	Ichneumonidae	Ctenopelmatinae	Mesoleiini	Campodorus	Campodorus liosternus	(Thomson, 1894)
Arthropoda	Insecta	Hymenoptera	Ichneumonidae	Ctenopelmatinae	Mesoleiini	Campodorus	Campodorus luctuosus	(Holmgren, 1857)
Arthropoda	Insecta	Hymenoptera	Ichneumonidae	Ctenopelmatinae	Mesoleiini	Campodorus	Campodorus maculicollis	(Stephens, 1835)
Arthropoda	Insecta	Hymenoptera	Ichneumonidae	Ctenopelmatinae	Mesoleiini	Campodorus	Campodorus marginalis	(Geoffroy, 1785)
Arthropoda	Insecta	Hymenoptera	Ichneumonidae	Ctenopelmatinae	Mesoleiini	Campodorus	Campodorus mediosanguineus	(Heinrich, 1950)
Arthropoda	Insecta	Hymenoptera	Ichneumonidae	Ctenopelmatinae	Mesoleiini	Campodorus	Campodorus melanogaster	(Holmgren, 1857)
Arthropoda	Insecta	Hymenoptera	Ichneumonidae	Ctenopelmatinae	Mesoleiini	Campodorus	Campodorus mixtus	(Holmgren, 1857)
Arthropoda	Insecta	Hymenoptera	Ichneumonidae	Ctenopelmatinae	Mesoleiini	Campodorus	Campodorus molestus	(Holmgren, 1857)
Arthropoda	Insecta	Hymenoptera	Ichneumonidae	Ctenopelmatinae	Mesoleiini	Campodorus	Campodorus mollis	(Gravenhorst, 1829)
Arthropoda	Insecta	Hymenoptera	Ichneumonidae	Ctenopelmatinae	Mesoleiini	Campodorus	Campodorus nematicida	(Horstmann, 1984)
Arthropoda	Insecta	Hymenoptera	Ichneumonidae	Ctenopelmatinae	Mesoleiini	Campodorus	Campodorus nigridens	(Thomson, 1894)
Arthropoda	Insecta	Hymenoptera	Ichneumonidae	Ctenopelmatinae	Mesoleiini	Campodorus	Campodorus nigriventris	Kasparyan, 2005
Arthropoda	Insecta	Hymenoptera	Ichneumonidae	Ctenopelmatinae	Mesoleiini	Campodorus	Campodorus patagiatus	(Holmgren, 1876)
Arthropoda	Insecta	Hymenoptera	Ichneumonidae	Ctenopelmatinae	Mesoleiini	Campodorus	Campodorus pectinator	Kasparyan, 2003
Arthropoda	Insecta	Hymenoptera	Ichneumonidae	Ctenopelmatinae	Mesoleiini	Campodorus	Campodorus scapularis	(Stephens, 1835)
Arthropoda	Insecta	Hymenoptera	Ichneumonidae	Ctenopelmatinae	Mesoleiini	Campodorus	Campodorus spurius	(Holmgren, 1857)
Arthropoda	Insecta	Hymenoptera	Ichneumonidae	Ctenopelmatinae	Mesoleiini	Campodorus	Campodorus torvus	(Holmgren, 1876)
Arthropoda	Insecta	Hymenoptera	Ichneumonidae	Ctenopelmatinae	Mesoleiini	Campodorus	Campodorus variegatus	(Jurine, 1807)
Arthropoda	Insecta	Hymenoptera	Ichneumonidae	Ctenopelmatinae	Mesoleiini	Campodorus	Campodorus vicinus	(Holmgren, 1857)
Arthropoda	Insecta	Hymenoptera	Ichneumonidae	Ctenopelmatinae	Mesoleiini	Campodorus	Campodorus viduus	(Holmgren, 1857)
Arthropoda	Insecta	Hymenoptera	Ichneumonidae	Ctenopelmatinae	Mesoleiini	Dentimachus	Dentimachus politus	(Habermehl, 1922)
Arthropoda	Insecta	Hymenoptera	Ichneumonidae	Ctenopelmatinae	Mesoleiini	Himerta	Himerta bisannulata	(Thomson, 1883)
Arthropoda	Insecta	Hymenoptera	Ichneumonidae	Ctenopelmatinae	Mesoleiini	Himerta	Himerta defectiva	(Gravenhorst, 1820)
Arthropoda	Insecta	Hymenoptera	Ichneumonidae	Ctenopelmatinae	Mesoleiini	Himerta	Himerta scutellaris	(Kriechbaumer, 1897)
Arthropoda	Insecta	Hymenoptera	Ichneumonidae	Ctenopelmatinae	Mesoleiini	Himerta	Himerta sepulchralis	(Holmgren, 1876)
Arthropoda	Insecta	Hymenoptera	Ichneumonidae	Ctenopelmatinae	Mesoleiini	Hyperbatus	Hyperbatus aemulus	(Holmgren, 1857)
Arthropoda	Insecta	Hymenoptera	Ichneumonidae	Ctenopelmatinae	Mesoleiini	Hyperbatus	Hyperbatus segmentator	(Holmgren, 1857)
Arthropoda	Insecta	Hymenoptera	Ichneumonidae	Ctenopelmatinae	Mesoleiini	Hyperbatus	Hyperbatus sternoxanthus	(Gravenhorst, 1829)
Arthropoda	Insecta	Hymenoptera	Ichneumonidae	Ctenopelmatinae	Mesoleiini	Lagarotis	Lagarotis alpina	(Strobl, 1903)
Arthropoda	Insecta	Hymenoptera	Ichneumonidae	Ctenopelmatinae	Mesoleiini	Lagarotis	Lagarotis debitor	(Thunberg, 1824)
Arthropoda	Insecta	Hymenoptera	Ichneumonidae	Ctenopelmatinae	Mesoleiini	Lagarotis	Lagarotis erythrocera	(Gravenhorst, 1829)
Arthropoda	Insecta	Hymenoptera	Ichneumonidae	Ctenopelmatinae	Mesoleiini	Lagarotis	Lagarotis pubescens	(Holmgren, 1857)
Arthropoda	Insecta	Hymenoptera	Ichneumonidae	Ctenopelmatinae	Mesoleiini	Lagarotis	Lagarotis semicaligata	(Gravenhorst, 1820)
Arthropoda	Insecta	Hymenoptera	Ichneumonidae	Ctenopelmatinae	Mesoleiini	Lagarotis	Lagarotis simulator	Heinrich, 1952
Arthropoda	Insecta	Hymenoptera	Ichneumonidae	Ctenopelmatinae	Mesoleiini	Lagarotis	Lagarotis subalpina	Heinrich, 1952
Arthropoda	Insecta	Hymenoptera	Ichneumonidae	Ctenopelmatinae	Mesoleiini	Lagarotis	Lagarotis ustulata	(Holmgren, 1857)
Arthropoda	Insecta	Hymenoptera	Ichneumonidae	Ctenopelmatinae	Mesoleiini	Lamachus	Lamachus alpinator	Aubert, 1970
Arthropoda	Insecta	Hymenoptera	Ichneumonidae	Ctenopelmatinae	Mesoleiini	Lamachus	Lamachus coalitorius	(Thunberg, 1824)
Arthropoda	Insecta	Hymenoptera	Ichneumonidae	Ctenopelmatinae	Mesoleiini	Lamachus	Lamachus consimilis	(Holmgren, 1857)
Arthropoda	Insecta	Hymenoptera	Ichneumonidae	Ctenopelmatinae	Mesoleiini	Lamachus	Lamachus cruralis	(Gravenhorst, 1829)
Arthropoda	Insecta	Hymenoptera	Ichneumonidae	Ctenopelmatinae	Mesoleiini	Lamachus	Lamachus dispar	(Holmgren, 1857)
Arthropoda	Insecta	Hymenoptera	Ichneumonidae	Ctenopelmatinae	Mesoleiini	Lamachus	Lamachus eques	(Hartig, 1838)
Arthropoda	Insecta	Hymenoptera	Ichneumonidae	Ctenopelmatinae	Mesoleiini	Lamachus	Lamachus frutetorum	(Hartig, 1838)
Arthropoda	Insecta	Hymenoptera	Ichneumonidae	Ctenopelmatinae	Mesoleiini	Lamachus	Lamachus pini	(Bridgman, 1882)
Arthropoda	Insecta	Hymenoptera	Ichneumonidae	Ctenopelmatinae	Mesoleiini	Lamachus	Lamachus transiens	(Ratzeburg, 1852)
Arthropoda	Insecta	Hymenoptera	Ichneumonidae	Ctenopelmatinae	Mesoleiini	Lamachus	Lamachus virgultorum	(Gravenhorst, 1829)
Arthropoda	Insecta	Hymenoptera	Ichneumonidae	Ctenopelmatinae	Mesoleiini	Mesoleius	Mesoleius agilis	Brischke, 1871
Arthropoda	Insecta	Hymenoptera	Ichneumonidae	Ctenopelmatinae	Mesoleiini	Mesoleius	Mesoleius armillatorius	(Gravenhorst, 1807)
Arthropoda	Insecta	Hymenoptera	Ichneumonidae	Ctenopelmatinae	Mesoleiini	Mesoleius	Mesoleius assiduus	Holmgren, 1876
Arthropoda	Insecta	Hymenoptera	Ichneumonidae	Ctenopelmatinae	Mesoleiini	Mesoleius	Mesoleius aulicus	(Gravenhorst, 1829)
Arthropoda	Insecta	Hymenoptera	Ichneumonidae	Ctenopelmatinae	Mesoleiini	Mesoleius	Mesoleius axillaris	(Stephens, 1835)
Arthropoda	Insecta	Hymenoptera	Ichneumonidae	Ctenopelmatinae	Mesoleiini	Mesoleius	Mesoleius cognatus	Brischke, 1871
Arthropoda	Insecta	Hymenoptera	Ichneumonidae	Ctenopelmatinae	Mesoleiini	Mesoleius	Mesoleius dubius	Holmgren, 1857
Arthropoda	Insecta	Hymenoptera	Ichneumonidae	Ctenopelmatinae	Mesoleiini	Mesoleius	Mesoleius efferus	Holmgren, 1876
Arthropoda	Insecta	Hymenoptera	Ichneumonidae	Ctenopelmatinae	Mesoleiini	Mesoleius	Mesoleius euphrosyne	Teunissen, 1953
Arthropoda	Insecta	Hymenoptera	Ichneumonidae	Ctenopelmatinae	Mesoleiini	Mesoleius	Mesoleius filicornis	Holmgren, 1876
Arthropoda	Insecta	Hymenoptera	Ichneumonidae	Ctenopelmatinae	Mesoleiini	Mesoleius	Mesoleius flavoguttatus	(Gravenhorst, 1829)
Arthropoda	Insecta	Hymenoptera	Ichneumonidae	Ctenopelmatinae	Mesoleiini	Mesoleius	Mesoleius frigidus	Holmgren, 1857
Arthropoda	Insecta	Hymenoptera	Ichneumonidae	Ctenopelmatinae	Mesoleiini	Mesoleius	Mesoleius frontatus	Thomson, 1894
Arthropoda	Insecta	Hymenoptera	Ichneumonidae	Ctenopelmatinae	Mesoleiini	Mesoleius	Mesoleius fuscipes	Holmgren, 1857
Arthropoda	Insecta	Hymenoptera	Ichneumonidae	Ctenopelmatinae	Mesoleiini	Mesoleius	Mesoleius grossulariae	(Ratzeburg, 1852)
Arthropoda	Insecta	Hymenoptera	Ichneumonidae	Ctenopelmatinae	Mesoleiini	Mesoleius	Mesoleius intermedius	(Gravenhorst, 1829)
Arthropoda	Insecta	Hymenoptera	Ichneumonidae	Ctenopelmatinae	Mesoleiini	Mesoleius	Mesoleius lindemansi	Teunissen, 1953
Arthropoda	Insecta	Hymenoptera	Ichneumonidae	Ctenopelmatinae	Mesoleiini	Mesoleius	Mesoleius melanoleucus	(Gravenhorst, 1829)
Arthropoda	Insecta	Hymenoptera	Ichneumonidae	Ctenopelmatinae	Mesoleiini	Mesoleius	Mesoleius montegratus	Bauer, 1985
Arthropoda	Insecta	Hymenoptera	Ichneumonidae	Ctenopelmatinae	Mesoleiini	Mesoleius	Mesoleius nimis	Heinrich, 1950
Arthropoda	Insecta	Hymenoptera	Ichneumonidae	Ctenopelmatinae	Mesoleiini	Mesoleius	Mesoleius nivalis	Holmgren, 1857
Arthropoda	Insecta	Hymenoptera	Ichneumonidae	Ctenopelmatinae	Mesoleiini	Mesoleius	Mesoleius obliquus	Thomson, 1894
Arthropoda	Insecta	Hymenoptera	Ichneumonidae	Ctenopelmatinae	Mesoleiini	Mesoleius	Mesoleius opticus	(Gravenhorst, 1829)
Arthropoda	Insecta	Hymenoptera	Ichneumonidae	Ctenopelmatinae	Mesoleiini	Mesoleius	Mesoleius peronatus	(Marshall, 1876)
Arthropoda	Insecta	Hymenoptera	Ichneumonidae	Ctenopelmatinae	Mesoleiini	Mesoleius	Mesoleius picticoxa	Thomson, 1894
Arthropoda	Insecta	Hymenoptera	Ichneumonidae	Ctenopelmatinae	Mesoleiini	Mesoleius	Mesoleius placidus	Holmgren, 1857
Arthropoda	Insecta	Hymenoptera	Ichneumonidae	Ctenopelmatinae	Mesoleiini	Mesoleius	Mesoleius pusio	Holmgren, 1857
Arthropoda	Insecta	Hymenoptera	Ichneumonidae	Ctenopelmatinae	Mesoleiini	Mesoleius	Mesoleius pyriformis	(Ratzeburg, 1852)
Arthropoda	Insecta	Hymenoptera	Ichneumonidae	Ctenopelmatinae	Mesoleiini	Mesoleius	Mesoleius roepkei	Teunissen, 1945
Arthropoda	Insecta	Hymenoptera	Ichneumonidae	Ctenopelmatinae	Mesoleiini	Mesoleius	Mesoleius rugipleuris	Heinrich, 1952
Arthropoda	Insecta	Hymenoptera	Ichneumonidae	Ctenopelmatinae	Mesoleiini	Mesoleius	Mesoleius strobli	Habermehl, 1925
Arthropoda	Insecta	Hymenoptera	Ichneumonidae	Ctenopelmatinae	Mesoleiini	Mesoleius	Mesoleius subroseus	Thomson, 1888
Arthropoda	Insecta	Hymenoptera	Ichneumonidae	Ctenopelmatinae	Mesoleiini	Mesoleius	Mesoleius tenthredinis	Morley, 1912
Arthropoda	Insecta	Hymenoptera	Ichneumonidae	Ctenopelmatinae	Mesoleiini	Mesoleius	Mesoleius tibialis	Holmgren, 1857
Arthropoda	Insecta	Hymenoptera	Ichneumonidae	Ctenopelmatinae	Mesoleiini	Mesoleius	Mesoleius urbanus	Teunissen, 1945
Arthropoda	Insecta	Hymenoptera	Ichneumonidae	Ctenopelmatinae	Mesoleiini	Neostroblia	Neostroblia ruficollis	(Holmgren, 1857)
Arthropoda	Insecta	Hymenoptera	Ichneumonidae	Ctenopelmatinae	Mesoleiini	Otlophorus	Otlophorus anceps	(Holmgren, 1857)
Arthropoda	Insecta	Hymenoptera	Ichneumonidae	Ctenopelmatinae	Mesoleiini	Otlophorus	Otlophorus carbonarius	(Gravenhorst, 1829)
Arthropoda	Insecta	Hymenoptera	Ichneumonidae	Ctenopelmatinae	Mesoleiini	Otlophorus	Otlophorus congruens	(Holmgren, 1858)
Arthropoda	Insecta	Hymenoptera	Ichneumonidae	Ctenopelmatinae	Mesoleiini	Otlophorus	Otlophorus exareolator	Aubert, 2007
Arthropoda	Insecta	Hymenoptera	Ichneumonidae	Ctenopelmatinae	Mesoleiini	Otlophorus	Otlophorus hypomelas	(Thomson, 1894)
Arthropoda	Insecta	Hymenoptera	Ichneumonidae	Ctenopelmatinae	Mesoleiini	Otlophorus	Otlophorus italicus	(Gravenhorst, 1829)
Arthropoda	Insecta	Hymenoptera	Ichneumonidae	Ctenopelmatinae	Mesoleiini	Otlophorus	Otlophorus melanocarus	(Thomson, 1894)
Arthropoda	Insecta	Hymenoptera	Ichneumonidae	Ctenopelmatinae	Mesoleiini	Otlophorus	Otlophorus minutus	(Rudow, 1881)
Arthropoda	Insecta	Hymenoptera	Ichneumonidae	Ctenopelmatinae	Mesoleiini	Otlophorus	Otlophorus nervellator	Aubert, 2007
Arthropoda	Insecta	Hymenoptera	Ichneumonidae	Ctenopelmatinae	Mesoleiini	Otlophorus	Otlophorus nigricoxator	Aubert, 2007
Arthropoda	Insecta	Hymenoptera	Ichneumonidae	Ctenopelmatinae	Mesoleiini	Otlophorus	Otlophorus nigritarsus	(Gravenhorst, 1829)
Arthropoda	Insecta	Hymenoptera	Ichneumonidae	Ctenopelmatinae	Mesoleiini	Otlophorus	Otlophorus pictus	Pfankuch, 1906
Arthropoda	Insecta	Hymenoptera	Ichneumonidae	Ctenopelmatinae	Mesoleiini	Otlophorus	Otlophorus pulverulentus	(Holmgren, 1857)
Arthropoda	Insecta	Hymenoptera	Ichneumonidae	Ctenopelmatinae	Mesoleiini	Otlophorus	Otlophorus rufogibbosus	(Kriechbaumer, 1897)
Arthropoda	Insecta	Hymenoptera	Ichneumonidae	Ctenopelmatinae	Mesoleiini	Otlophorus	Otlophorus senilis	(Holmgren, 1876)
Arthropoda	Insecta	Hymenoptera	Ichneumonidae	Ctenopelmatinae	Mesoleiini	Otlophorus	Otlophorus vepretorum	(Gravenhorst, 1829)
Arthropoda	Insecta	Hymenoptera	Ichneumonidae	Ctenopelmatinae	Mesoleiini	Perispuda	Perispuda bignellii	(Bridgman, 1881)
Arthropoda	Insecta	Hymenoptera	Ichneumonidae	Ctenopelmatinae	Mesoleiini	Perispuda	Perispuda facialis	(Gravenhorst, 1829)
Arthropoda	Insecta	Hymenoptera	Ichneumonidae	Ctenopelmatinae	Mesoleiini	Perispuda	Perispuda mesoxantha	(Thomson, 1894)
Arthropoda	Insecta	Hymenoptera	Ichneumonidae	Ctenopelmatinae	Mesoleiini	Perispuda	Perispuda sulphurata	(Gravenhorst, 1807)
Arthropoda	Insecta	Hymenoptera	Ichneumonidae	Ctenopelmatinae	Mesoleiini	Protarchus	Protarchus sorbi	(Ratzeburg, 1844)
Arthropoda	Insecta	Hymenoptera	Ichneumonidae	Ctenopelmatinae	Mesoleiini	Protarchus	Protarchus testatorius	(Thunberg, 1824)
Arthropoda	Insecta	Hymenoptera	Ichneumonidae	Ctenopelmatinae	Mesoleiini	Rhinotorus	Rhinotorus compactor	(Thunberg, 1824)
Arthropoda	Insecta	Hymenoptera	Ichneumonidae	Ctenopelmatinae	Mesoleiini	Rhinotorus	Rhinotorus jussilai	Reshchikov, 2016
Arthropoda	Insecta	Hymenoptera	Ichneumonidae	Ctenopelmatinae	Mesoleiini	Rhinotorus	Rhinotorus leucostomus	(Gravenhorst, 1829)
Arthropoda	Insecta	Hymenoptera	Ichneumonidae	Ctenopelmatinae	Mesoleiini	Rhinotorus	Rhinotorus longicornis	(Schmiedeknecht, 1914)
Arthropoda	Insecta	Hymenoptera	Ichneumonidae	Ctenopelmatinae	Mesoleiini	Rhinotorus	Rhinotorus mesocastanus	(Thomson, 1894)
Arthropoda	Insecta	Hymenoptera	Ichneumonidae	Ctenopelmatinae	Mesoleiini	Rhinotorus	Rhinotorus nasutus	(Gravenhorst, 1829)
Arthropoda	Insecta	Hymenoptera	Ichneumonidae	Ctenopelmatinae	Mesoleiini	Rhinotorus	Rhinotorus similis	(Brischke, 1892)
Arthropoda	Insecta	Hymenoptera	Ichneumonidae	Ctenopelmatinae	Mesoleiini	Saotis	Saotis bilineata	(Gravenhorst, 1829)
Arthropoda	Insecta	Hymenoptera	Ichneumonidae	Ctenopelmatinae	Mesoleiini	Saotis	Saotis compressiuscula	(Thomson, 1883)
Arthropoda	Insecta	Hymenoptera	Ichneumonidae	Ctenopelmatinae	Mesoleiini	Saotis	Saotis granulator	Kasparyan & Kopelke, 2010
Arthropoda	Insecta	Hymenoptera	Ichneumonidae	Ctenopelmatinae	Mesoleiini	Saotis	Saotis mirabilis	Schmiedeknecht, 1914
Arthropoda	Insecta	Hymenoptera	Ichneumonidae	Ctenopelmatinae	Mesoleiini	Saotis	Saotis morleyi	Fitton, 1976
Arthropoda	Insecta	Hymenoptera	Ichneumonidae	Ctenopelmatinae	Mesoleiini	Saotis	Saotis nigriventris	(Thomson, 1894)
Arthropoda	Insecta	Hymenoptera	Ichneumonidae	Ctenopelmatinae	Mesoleiini	Saotis	Saotis pygidiator	Kasparyan & Kopelke, 2009
Arthropoda	Insecta	Hymenoptera	Ichneumonidae	Ctenopelmatinae	Mesoleiini	Saotis	Saotis renovata	(Morley, 1911)
Arthropoda	Insecta	Hymenoptera	Ichneumonidae	Ctenopelmatinae	Mesoleiini	Saotis	Saotis tricolor	(Thomson, 1883)
Arthropoda	Insecta	Hymenoptera	Ichneumonidae	Ctenopelmatinae	Mesoleiini	Scopesis	Scopesis alpivagans	Heinrich, 1949
Arthropoda	Insecta	Hymenoptera	Ichneumonidae	Ctenopelmatinae	Mesoleiini	Scopesis	Scopesis areolaris	(Pfankuch, 1921)
Arthropoda	Insecta	Hymenoptera	Ichneumonidae	Ctenopelmatinae	Mesoleiini	Scopesis	Scopesis bicolor	(Gravenhorst, 1829)
Arthropoda	Insecta	Hymenoptera	Ichneumonidae	Ctenopelmatinae	Mesoleiini	Scopesis	Scopesis depressa	(Thomson, 1894)
Arthropoda	Insecta	Hymenoptera	Ichneumonidae	Ctenopelmatinae	Mesoleiini	Scopesis	Scopesis flavopicta	(Gravenhorst, 1829)
Arthropoda	Insecta	Hymenoptera	Ichneumonidae	Ctenopelmatinae	Mesoleiini	Scopesis	Scopesis fraterna	(Holmgren, 1857)
Arthropoda	Insecta	Hymenoptera	Ichneumonidae	Ctenopelmatinae	Mesoleiini	Scopesis	Scopesis frontator	(Thunberg, 1824)
Arthropoda	Insecta	Hymenoptera	Ichneumonidae	Ctenopelmatinae	Mesoleiini	Scopesis	Scopesis gesticulator	(Thunberg, 1824)
Arthropoda	Insecta	Hymenoptera	Ichneumonidae	Ctenopelmatinae	Mesoleiini	Scopesis	Scopesis macropus	(Thomson, 1894)
Arthropoda	Insecta	Hymenoptera	Ichneumonidae	Ctenopelmatinae	Mesoleiini	Scopesis	Scopesis obscura	(Holmgren, 1857)
Arthropoda	Insecta	Hymenoptera	Ichneumonidae	Ctenopelmatinae	Mesoleiini	Scopesis	Scopesis polita	(Holmgren, 1857)
Arthropoda	Insecta	Hymenoptera	Ichneumonidae	Ctenopelmatinae	Mesoleiini	Scopesis	Scopesis rubrotincta	(Schmiedeknecht, 1914)
Arthropoda	Insecta	Hymenoptera	Ichneumonidae	Ctenopelmatinae	Mesoleiini	Scopesis	Scopesis rufonotata	(Holmgren, 1876)
Arthropoda	Insecta	Hymenoptera	Ichneumonidae	Ctenopelmatinae	Mesoleiini	Scopesis	Scopesis tarsatae	Horstmann, 2006
Arthropoda	Insecta	Hymenoptera	Ichneumonidae	Ctenopelmatinae	Mesoleiini	Scopesis	Scopesis tegularis	(Thomson, 1894)
Arthropoda	Insecta	Hymenoptera	Ichneumonidae	Ctenopelmatinae	Mesoleiini	Scopesis	Scopesis ulbrichti	(Teunissen, 1953)
Arthropoda	Insecta	Hymenoptera	Ichneumonidae	Ctenopelmatinae	Mesoleiini	Smicrolius	Smicrolius parvicalcar	(Thomson, 1894)
Arthropoda	Insecta	Hymenoptera	Ichneumonidae	Ctenopelmatinae	Perilissini	Absyrtus	Absyrtus vernalis	Bauer, 1961
Arthropoda	Insecta	Hymenoptera	Ichneumonidae	Ctenopelmatinae	Perilissini	Absyrtus	Absyrtus vicinator	(Thunberg, 1824)
Arthropoda	Insecta	Hymenoptera	Ichneumonidae	Ctenopelmatinae	Perilissini	Bremiella	Bremiella pulchella	(Kriechbaumer, 1890)
Arthropoda	Insecta	Hymenoptera	Ichneumonidae	Ctenopelmatinae	Perilissini	Labrossyta	Labrossyta scotoptera	(Gravenhorst, 1820)
Arthropoda	Insecta	Hymenoptera	Ichneumonidae	Ctenopelmatinae	Perilissini	Lathiponus	Lathiponus semiluctuosus	(Vollenhoven, 1878)
Arthropoda	Insecta	Hymenoptera	Ichneumonidae	Ctenopelmatinae	Perilissini	Lathrolestes	Lathrolestes albicinctus	(Habermehl, 1922)
Arthropoda	Insecta	Hymenoptera	Ichneumonidae	Ctenopelmatinae	Perilissini	Lathrolestes	Lathrolestes bipunctatus	(Bridgman, 1886)
Arthropoda	Insecta	Hymenoptera	Ichneumonidae	Ctenopelmatinae	Perilissini	Lathrolestes	Lathrolestes buccinator	(Holmgren, 1857)
Arthropoda	Insecta	Hymenoptera	Ichneumonidae	Ctenopelmatinae	Perilissini	Lathrolestes	Lathrolestes caudatus	(Thomson, 1883)
Arthropoda	Insecta	Hymenoptera	Ichneumonidae	Ctenopelmatinae	Perilissini	Lathrolestes	Lathrolestes citreus	(Brischke, 1878)
Arthropoda	Insecta	Hymenoptera	Ichneumonidae	Ctenopelmatinae	Perilissini	Lathrolestes	Lathrolestes clypeatus	(Zetterstedt, 1838)
Arthropoda	Insecta	Hymenoptera	Ichneumonidae	Ctenopelmatinae	Perilissini	Lathrolestes	Lathrolestes ensator	(Brauns, 1898)
Arthropoda	Insecta	Hymenoptera	Ichneumonidae	Ctenopelmatinae	Perilissini	Lathrolestes	Lathrolestes erythrocephalus	(Gravenhorst, 1829)
Arthropoda	Insecta	Hymenoptera	Ichneumonidae	Ctenopelmatinae	Perilissini	Lathrolestes	Lathrolestes lucidulus	(Holmgren, 1857)
Arthropoda	Insecta	Hymenoptera	Ichneumonidae	Ctenopelmatinae	Perilissini	Lathrolestes	Lathrolestes luteolator	(Gravenhorst, 1829)
Arthropoda	Insecta	Hymenoptera	Ichneumonidae	Ctenopelmatinae	Perilissini	Lathrolestes	Lathrolestes macropygus	(Holmgren, 1857)
Arthropoda	Insecta	Hymenoptera	Ichneumonidae	Ctenopelmatinae	Perilissini	Lathrolestes	Lathrolestes nigricollis	(Thomson, 1883)
Arthropoda	Insecta	Hymenoptera	Ichneumonidae	Ctenopelmatinae	Perilissini	Lathrolestes	Lathrolestes orbitalis	(Gravenhorst, 1829)
Arthropoda	Insecta	Hymenoptera	Ichneumonidae	Ctenopelmatinae	Perilissini	Lathrolestes	Lathrolestes pictilis	(Holmgren, 1857)
Arthropoda	Insecta	Hymenoptera	Ichneumonidae	Ctenopelmatinae	Perilissini	Lathrolestes	Lathrolestes pleuralis	(Thomson, 1883)
Arthropoda	Insecta	Hymenoptera	Ichneumonidae	Ctenopelmatinae	Perilissini	Lathrolestes	Lathrolestes tripunctor	(Thunberg, 1824)
Arthropoda	Insecta	Hymenoptera	Ichneumonidae	Ctenopelmatinae	Perilissini	Lathrolestes	Lathrolestes ungularis	(Thomson, 1883)
Arthropoda	Insecta	Hymenoptera	Ichneumonidae	Ctenopelmatinae	Perilissini	Lathrolestes	Lathrolestes verticalis	(Brischke, 1871)
Arthropoda	Insecta	Hymenoptera	Ichneumonidae	Ctenopelmatinae	Perilissini	Lophyroplectus	Lophyroplectus oblongopunctatus	(Hartig, 1838)
Arthropoda	Insecta	Hymenoptera	Ichneumonidae	Ctenopelmatinae	Perilissini	Oetophorus	Oetophorus naevius	(Gmelin, 1790)
Arthropoda	Insecta	Hymenoptera	Ichneumonidae	Ctenopelmatinae	Perilissini	Opheltes	Opheltes glaucopterus	(Linnaeus, 1758)
Arthropoda	Insecta	Hymenoptera	Ichneumonidae	Ctenopelmatinae	Perilissini	Perilissus	Perilissus albitarsis	Thomson, 1883
Arthropoda	Insecta	Hymenoptera	Ichneumonidae	Ctenopelmatinae	Perilissini	Perilissus	Perilissus banaticus	(Kiss, 1924)
Arthropoda	Insecta	Hymenoptera	Ichneumonidae	Ctenopelmatinae	Perilissini	Perilissus	Perilissus compressus	Thomson, 1883
Arthropoda	Insecta	Hymenoptera	Ichneumonidae	Ctenopelmatinae	Perilissini	Perilissus	Perilissus coxalis	Thomson, 1883
Arthropoda	Insecta	Hymenoptera	Ichneumonidae	Ctenopelmatinae	Perilissini	Perilissus	Perilissus holmgreni	Habermehl, 1925
Arthropoda	Insecta	Hymenoptera	Ichneumonidae	Ctenopelmatinae	Perilissini	Perilissus	Perilissus lutescens	Holmgren, 1857
Arthropoda	Insecta	Hymenoptera	Ichneumonidae	Ctenopelmatinae	Perilissini	Perilissus	Perilissus pallidus	(Gravenhorst, 1829)
Arthropoda	Insecta	Hymenoptera	Ichneumonidae	Ctenopelmatinae	Perilissini	Perilissus	Perilissus punctatissimus	Strobl, 1903
Arthropoda	Insecta	Hymenoptera	Ichneumonidae	Ctenopelmatinae	Perilissini	Perilissus	Perilissus rufoniger	(Gravenhorst, 1820)
Arthropoda	Insecta	Hymenoptera	Ichneumonidae	Ctenopelmatinae	Perilissini	Perilissus	Perilissus sericeus	(Gravenhorst, 1829)
Arthropoda	Insecta	Hymenoptera	Ichneumonidae	Ctenopelmatinae	Perilissini	Perilissus	Perilissus spilonotus	(Stephens, 1835)
Arthropoda	Insecta	Hymenoptera	Ichneumonidae	Ctenopelmatinae	Perilissini	Perilissus	Perilissus variator	(Müller, 1776)
Arthropoda	Insecta	Hymenoptera	Ichneumonidae	Ctenopelmatinae	Perilissini	Priopoda	Priopoda apicaria	(Geoffroy, 1785)
Arthropoda	Insecta	Hymenoptera	Ichneumonidae	Ctenopelmatinae	Perilissini	Priopoda	Priopoda xanthopsana	(Gravenhorst, 1829)
Arthropoda	Insecta	Hymenoptera	Ichneumonidae	Ctenopelmatinae	Perilissini	Synoecetes	Synoecetes anterior	(Thomson, 1894)
Arthropoda	Insecta	Hymenoptera	Ichneumonidae	Ctenopelmatinae	Perilissini	Synoecetes	Synoecetes blancoburgensis	(Schmiedeknecht, 1914)
Arthropoda	Insecta	Hymenoptera	Ichneumonidae	Ctenopelmatinae	Perilissini	Synoecetes	Synoecetes tenuicornis	(Gravenhorst, 1829)
Arthropoda	Insecta	Hymenoptera	Ichneumonidae	Ctenopelmatinae	Perilissini	Trematopygodes	Trematopygodes aprilinus	(Giraud, 1872)
Arthropoda	Insecta	Hymenoptera	Ichneumonidae	Ctenopelmatinae	Perilissini	Trematopygodes	Trematopygodes auriculator	Hinz, 1980
Arthropoda	Insecta	Hymenoptera	Ichneumonidae	Ctenopelmatinae	Perilissini	Trematopygodes	Trematopygodes rarus	Horstmann, 1990
Arthropoda	Insecta	Hymenoptera	Ichneumonidae	Ctenopelmatinae	Perilissini	Zaplethocornia	Zaplethocornia exstinctor	Aubert, 1985
Arthropoda	Insecta	Hymenoptera	Ichneumonidae	Ctenopelmatinae	Perilissini	Zaplethocornia	Zaplethocornia procurator	(Gravenhorst, 1820)
Arthropoda	Insecta	Hymenoptera	Ichneumonidae	Ctenopelmatinae	Pionini	Asthenara	Asthenara scabricula	(Thomson, 1894)
Arthropoda	Insecta	Hymenoptera	Ichneumonidae	Ctenopelmatinae	Pionini	Asthenara	Asthenara socia	(Holmgren, 1857)
Arthropoda	Insecta	Hymenoptera	Ichneumonidae	Ctenopelmatinae	Pionini	Glyptorhaestus	Glyptorhaestus boschmai	Teunissen, 1953
Arthropoda	Insecta	Hymenoptera	Ichneumonidae	Ctenopelmatinae	Pionini	Glyptorhaestus	Glyptorhaestus periclistor	Hinz, 1975
Arthropoda	Insecta	Hymenoptera	Ichneumonidae	Ctenopelmatinae	Pionini	Glyptorhaestus	Glyptorhaestus pumilus	Hinz, 1975
Arthropoda	Insecta	Hymenoptera	Ichneumonidae	Ctenopelmatinae	Pionini	Glyptorhaestus	Glyptorhaestus punctatus	(Thomson, 1890)
Arthropoda	Insecta	Hymenoptera	Ichneumonidae	Ctenopelmatinae	Pionini	Glyptorhaestus	Glyptorhaestus punctulatus	(Woldstedt, 1877)
Arthropoda	Insecta	Hymenoptera	Ichneumonidae	Ctenopelmatinae	Pionini	Glyptorhaestus	Glyptorhaestus selandrivorus	(Giraud, 1872)
Arthropoda	Insecta	Hymenoptera	Ichneumonidae	Ctenopelmatinae	Pionini	Hodostates	Hodostates brevis	(Thomson, 1883)
Arthropoda	Insecta	Hymenoptera	Ichneumonidae	Ctenopelmatinae	Pionini	Ischyrocnemis	Ischyrocnemis goesi	Holmgren, 1858
Arthropoda	Insecta	Hymenoptera	Ichneumonidae	Ctenopelmatinae	Pionini	Lethades	Lethades amauronemati	(Hinz, 1961)
Arthropoda	Insecta	Hymenoptera	Ichneumonidae	Ctenopelmatinae	Pionini	Lethades	Lethades cingulator	Hinz, 1976
Arthropoda	Insecta	Hymenoptera	Ichneumonidae	Ctenopelmatinae	Pionini	Lethades	Lethades curvispina	(Thomson, 1883)
Arthropoda	Insecta	Hymenoptera	Ichneumonidae	Ctenopelmatinae	Pionini	Lethades	Lethades facialis	(Brischke, 1871)
Arthropoda	Insecta	Hymenoptera	Ichneumonidae	Ctenopelmatinae	Pionini	Lethades	Lethades imperfecti	Hinz, 1996
Arthropoda	Insecta	Hymenoptera	Ichneumonidae	Ctenopelmatinae	Pionini	Lethades	Lethades lapponicus	(Holmgren, 1857)
Arthropoda	Insecta	Hymenoptera	Ichneumonidae	Ctenopelmatinae	Pionini	Lethades	Lethades punctatissimus	(Strobl, 1903)
Arthropoda	Insecta	Hymenoptera	Ichneumonidae	Ctenopelmatinae	Pionini	Lethades	Lethades scabriculus	(Thomson, 1883)
Arthropoda	Insecta	Hymenoptera	Ichneumonidae	Ctenopelmatinae	Pionini	Lethades	Lethades schmiedeknechti	Hinz, 1996
Arthropoda	Insecta	Hymenoptera	Ichneumonidae	Ctenopelmatinae	Pionini	Pion	Pion fortipes	(Gravenhorst, 1829)
Arthropoda	Insecta	Hymenoptera	Ichneumonidae	Ctenopelmatinae	Pionini	Pion	Pion nigripes	Schiødte, 1839
Arthropoda	Insecta	Hymenoptera	Ichneumonidae	Ctenopelmatinae	Pionini	Pion	Pion stammeri	Bauer, 1958
Arthropoda	Insecta	Hymenoptera	Ichneumonidae	Ctenopelmatinae	Pionini	Rhaestus	Rhaestus lativentris	(Holmgren, 1858)
Arthropoda	Insecta	Hymenoptera	Ichneumonidae	Ctenopelmatinae	Pionini	Rhaestus	Rhaestus rufipes	(Holmgren, 1857)
Arthropoda	Insecta	Hymenoptera	Ichneumonidae	Ctenopelmatinae	Pionini	Rhorus	Rhorus amauronemati	Kasparyan, 2017
Arthropoda	Insecta	Hymenoptera	Ichneumonidae	Ctenopelmatinae	Pionini	Rhorus	Rhorus angulatus	(Thomson, 1888)
Arthropoda	Insecta	Hymenoptera	Ichneumonidae	Ctenopelmatinae	Pionini	Rhorus	Rhorus austriator	Aubert, 1988
Arthropoda	Insecta	Hymenoptera	Ichneumonidae	Ctenopelmatinae	Pionini	Rhorus	Rhorus binotatus	(Kriechbaumer, 1897)
Arthropoda	Insecta	Hymenoptera	Ichneumonidae	Ctenopelmatinae	Pionini	Rhorus	Rhorus blennocampae	Kasparyan, 2017
Arthropoda	Insecta	Hymenoptera	Ichneumonidae	Ctenopelmatinae	Pionini	Rhorus	Rhorus brunnifemur	Kasparyan, 2015
Arthropoda	Insecta	Hymenoptera	Ichneumonidae	Ctenopelmatinae	Pionini	Rhorus	Rhorus carinifer	Kasparyan, 2019
Arthropoda	Insecta	Hymenoptera	Ichneumonidae	Ctenopelmatinae	Pionini	Rhorus	Rhorus chrysopus	(Gmelin, 1790)
Arthropoda	Insecta	Hymenoptera	Ichneumonidae	Ctenopelmatinae	Pionini	Rhorus	Rhorus chrysopygus	(Roman, 1909)
Arthropoda	Insecta	Hymenoptera	Ichneumonidae	Ctenopelmatinae	Pionini	Rhorus	Rhorus dineurae	Kasparyan, 2017
Arthropoda	Insecta	Hymenoptera	Ichneumonidae	Ctenopelmatinae	Pionini	Rhorus	Rhorus emarginatus	Kasparyan, 2019
Arthropoda	Insecta	Hymenoptera	Ichneumonidae	Ctenopelmatinae	Pionini	Rhorus	Rhorus exstirpatorius	(Gravenhorst, 1829)
Arthropoda	Insecta	Hymenoptera	Ichneumonidae	Ctenopelmatinae	Pionini	Rhorus	Rhorus fasciatus	(Gravenhorst, 1829)
Arthropoda	Insecta	Hymenoptera	Ichneumonidae	Ctenopelmatinae	Pionini	Rhorus	Rhorus flavopictus	(Strobl, 1903)
Arthropoda	Insecta	Hymenoptera	Ichneumonidae	Ctenopelmatinae	Pionini	Rhorus	Rhorus longicornis	(Holmgren, 1858)
Arthropoda	Insecta	Hymenoptera	Ichneumonidae	Ctenopelmatinae	Pionini	Rhorus	Rhorus neustriae	(Schrank, 1802)
Arthropoda	Insecta	Hymenoptera	Ichneumonidae	Ctenopelmatinae	Pionini	Rhorus	Rhorus neuter	Aubert, 1988
Arthropoda	Insecta	Hymenoptera	Ichneumonidae	Ctenopelmatinae	Pionini	Rhorus	Rhorus nigritarsis	(Hedwig, 1956)
Arthropoda	Insecta	Hymenoptera	Ichneumonidae	Ctenopelmatinae	Pionini	Rhorus	Rhorus palustris	(Holmgren, 1857)
Arthropoda	Insecta	Hymenoptera	Ichneumonidae	Ctenopelmatinae	Pionini	Rhorus	Rhorus pristiphorae	Kasparyan, 2014
Arthropoda	Insecta	Hymenoptera	Ichneumonidae	Ctenopelmatinae	Pionini	Rhorus	Rhorus punctus	(Gravenhorst, 1829)
Arthropoda	Insecta	Hymenoptera	Ichneumonidae	Ctenopelmatinae	Pionini	Rhorus	Rhorus subfasciatus	(Stephens, 1835)
Arthropoda	Insecta	Hymenoptera	Ichneumonidae	Ctenopelmatinae	Pionini	Rhorus	Rhorus substitutor	(Thunberg, 1824)
Arthropoda	Insecta	Hymenoptera	Ichneumonidae	Ctenopelmatinae	Pionini	Rhorus	Rhorus trochanteratus	Kasparyan, 2015
Arthropoda	Insecta	Hymenoptera	Ichneumonidae	Ctenopelmatinae	Pionini	Rhorus	Rhorus xanthopygus	Kasparyan, 2014
Arthropoda	Insecta	Hymenoptera	Ichneumonidae	Ctenopelmatinae	Pionini	Sympherta	Sympherta antilope	(Gravenhorst, 1829)
Arthropoda	Insecta	Hymenoptera	Ichneumonidae	Ctenopelmatinae	Pionini	Sympherta	Sympherta canaliculata	(Thomson, 1893)
Arthropoda	Insecta	Hymenoptera	Ichneumonidae	Ctenopelmatinae	Pionini	Sympherta	Sympherta facialis	Hinz, 1991
Arthropoda	Insecta	Hymenoptera	Ichneumonidae	Ctenopelmatinae	Pionini	Sympherta	Sympherta foveolator	(Holmgren, 1856)
Arthropoda	Insecta	Hymenoptera	Ichneumonidae	Ctenopelmatinae	Pionini	Sympherta	Sympherta montana	(Gravenhorst, 1829)
Arthropoda	Insecta	Hymenoptera	Ichneumonidae	Ctenopelmatinae	Pionini	Sympherta	Sympherta obligator	(Thunberg, 1824)
Arthropoda	Insecta	Hymenoptera	Ichneumonidae	Ctenopelmatinae	Pionini	Sympherta	Sympherta splendens	(Strobl, 1903)
Arthropoda	Insecta	Hymenoptera	Ichneumonidae	Ctenopelmatinae	Pionini	Sympherta	Sympherta styriaca	(Heinrich, 1953)
Arthropoda	Insecta	Hymenoptera	Ichneumonidae	Ctenopelmatinae	Pionini	Sympherta	Sympherta sulcata	(Thomson, 1894)
Arthropoda	Insecta	Hymenoptera	Ichneumonidae	Ctenopelmatinae	Pionini	Sympherta	Sympherta tenthredinarum	Horstmann, 1999
Arthropoda	Insecta	Hymenoptera	Ichneumonidae	Ctenopelmatinae	Pionini	Sympherta	Sympherta ullrichi	(Tschek, 1869)
Arthropoda	Insecta	Hymenoptera	Ichneumonidae	Ctenopelmatinae	Pionini	Syntactus	Syntactus delusor	(Linnaeus, 1758)
Arthropoda	Insecta	Hymenoptera	Ichneumonidae	Ctenopelmatinae	Pionini	Syntactus	Syntactus minor	(Holmgren, 1857)
Arthropoda	Insecta	Hymenoptera	Ichneumonidae	Ctenopelmatinae	Pionini	Trematopygus	Trematopygus dubitor	Hinz, 1982
Arthropoda	Insecta	Hymenoptera	Ichneumonidae	Ctenopelmatinae	Pionini	Trematopygus	Trematopygus lethierryi	Thomson, 1894
Arthropoda	Insecta	Hymenoptera	Ichneumonidae	Ctenopelmatinae	Pionini	Trematopygus	Trematopygus melanocerus	(Gravenhorst, 1829)
Arthropoda	Insecta	Hymenoptera	Ichneumonidae	Ctenopelmatinae	Pionini	Trematopygus	Trematopygus nigricornis	Holmgren, 1857
Arthropoda	Insecta	Hymenoptera	Ichneumonidae	Ctenopelmatinae	Pionini	Trematopygus	Trematopygus rufator	Hinz, 1986
Arthropoda	Insecta	Hymenoptera	Ichneumonidae	Ctenopelmatinae	Pionini	Trematopygus	Trematopygus ruficornis	(Zetterstedt, 1838)
Arthropoda	Insecta	Hymenoptera	Ichneumonidae	Ctenopelmatinae	Pionini	Trematopygus	Trematopygus spiniger	Hinz, 1976
Arthropoda	Insecta	Hymenoptera	Ichneumonidae	Ctenopelmatinae	Pionini	Trematopygus	Trematopygus vellicans	(Gravenhorst, 1829)
Arthropoda	Insecta	Hymenoptera	Ichneumonidae	Ctenopelmatinae	Scolobatini	Scolobates	Scolobates auriculatus	(Fabricius, 1804)
Arthropoda	Insecta	Hymenoptera	Ichneumonidae	Ctenopelmatinae	Scolobatini	Scolobates	Scolobates longicornis	Gravenhorst, 1829
Arthropoda	Insecta	Hymenoptera	Ichneumonidae	Ctenopelmatinae	Scolobatini	Scolobates	Scolobates nigerrimus	Ulbricht, 1922
Arthropoda	Insecta	Hymenoptera	Ichneumonidae	Ctenopelmatinae	Seleucini	Seleucus	Seleucus cuneiformis	Holmgren, 1860
Arthropoda	Insecta	Hymenoptera	Ichneumonidae	Cylloceriinae		Allomacrus	Allomacrus arcticus	(Holmgren, 1880)
Arthropoda	Insecta	Hymenoptera	Ichneumonidae	Cylloceriinae		Allomacrus	Allomacrus longecaudatus	(Strobl, 1903)
Arthropoda	Insecta	Hymenoptera	Ichneumonidae	Cylloceriinae		Cylloceria	Cylloceria melancholica	(Gravenhorst, 1820)
Arthropoda	Insecta	Hymenoptera	Ichneumonidae	Cylloceriinae		Cylloceria	Cylloceria occupator	(Gravenhorst, 1829)
Arthropoda	Insecta	Hymenoptera	Ichneumonidae	Cylloceriinae		Cylloceria	Cylloceria sylvestris	(Gravenhorst, 1829)
Arthropoda	Insecta	Hymenoptera	Ichneumonidae	Cylloceriinae		Hyperacmus	Hyperacmus crassicornis	(Gravenhorst, 1829)
Arthropoda	Insecta	Hymenoptera	Ichneumonidae	Cylloceriinae		Rossemia	Rossemia longithorax	Humala, 1997
Arthropoda	Insecta	Hymenoptera	Ichneumonidae	Diacritinae		Diacritus	Diacritus aciculatus	(Vollenhoven, 1878)
Arthropoda	Insecta	Hymenoptera	Ichneumonidae	Diplazontinae		Bioblapsis	Bioblapsis polita	(Vollenhoven, 1878)
Arthropoda	Insecta	Hymenoptera	Ichneumonidae	Diplazontinae		Campocraspedon	Campocraspedon annulitarsis	(Hedwig, 1938)
Arthropoda	Insecta	Hymenoptera	Ichneumonidae	Diplazontinae		Campocraspedon	Campocraspedon caudatus	(Thomson, 1890)
Arthropoda	Insecta	Hymenoptera	Ichneumonidae	Diplazontinae		Daschia	Daschia brevitarsis	(Thomson, 1890)
Arthropoda	Insecta	Hymenoptera	Ichneumonidae	Diplazontinae		Diplazon	Diplazon angustus	Dasch, 1964
Arthropoda	Insecta	Hymenoptera	Ichneumonidae	Diplazontinae		Diplazon	Diplazon annulatus	(Gravenhorst, 1829)
Arthropoda	Insecta	Hymenoptera	Ichneumonidae	Diplazontinae		Diplazon	Diplazon deletus	(Thomson, 1890)
Arthropoda	Insecta	Hymenoptera	Ichneumonidae	Diplazontinae		Diplazon	Diplazon laetatorius	(Fabricius, 1781)
Arthropoda	Insecta	Hymenoptera	Ichneumonidae	Diplazontinae		Diplazon	Diplazon neoalpinus	Zwakhals, 1979
Arthropoda	Insecta	Hymenoptera	Ichneumonidae	Diplazontinae		Diplazon	Diplazon pallicoxa	Manukyan, 1987
Arthropoda	Insecta	Hymenoptera	Ichneumonidae	Diplazontinae		Diplazon	Diplazon pectoratorius	(Thunberg, 1824)
Arthropoda	Insecta	Hymenoptera	Ichneumonidae	Diplazontinae		Diplazon	Diplazon scutatorius	Teunissen, 1943
Arthropoda	Insecta	Hymenoptera	Ichneumonidae	Diplazontinae		Diplazon	Diplazon tetragonus	(Thunberg, 1824)
Arthropoda	Insecta	Hymenoptera	Ichneumonidae	Diplazontinae		Diplazon	Diplazon tibiatorius	(Thunberg, 1824)
Arthropoda	Insecta	Hymenoptera	Ichneumonidae	Diplazontinae		Diplazon	Diplazon varicoxa	(Thomson, 1890)
Arthropoda	Insecta	Hymenoptera	Ichneumonidae	Diplazontinae		Enizemum	Enizemum nigricorne	(Thomson, 1890)
Arthropoda	Insecta	Hymenoptera	Ichneumonidae	Diplazontinae		Enizemum	Enizemum ornatum	(Gravenhorst, 1829)
Arthropoda	Insecta	Hymenoptera	Ichneumonidae	Diplazontinae		Enizemum	Enizemum scutellare	(Lange, 1911)
Arthropoda	Insecta	Hymenoptera	Ichneumonidae	Diplazontinae		Episemura	Episemura ensata	(Bauer, 1981)
Arthropoda	Insecta	Hymenoptera	Ichneumonidae	Diplazontinae		Fossatyloides	Fossatyloides gracilentus	(Holmgren, 1858)
Arthropoda	Insecta	Hymenoptera	Ichneumonidae	Diplazontinae		Homotropus	Homotropus crassicornis	Thomson, 1890
Arthropoda	Insecta	Hymenoptera	Ichneumonidae	Diplazontinae		Homotropus	Homotropus dimidiatus	(Schrank, 1802)
Arthropoda	Insecta	Hymenoptera	Ichneumonidae	Diplazontinae		Homotropus	Homotropus elegans	(Gravenhorst, 1829)
Arthropoda	Insecta	Hymenoptera	Ichneumonidae	Diplazontinae		Homotropus	Homotropus frontorius	(Thunberg, 1824)
Arthropoda	Insecta	Hymenoptera	Ichneumonidae	Diplazontinae		Homotropus	Homotropus haemorrhoidalis	Szépligeti, 1898
Arthropoda	Insecta	Hymenoptera	Ichneumonidae	Diplazontinae		Homotropus	Homotropus incisus	Thomson, 1890
Arthropoda	Insecta	Hymenoptera	Ichneumonidae	Diplazontinae		Homotropus	Homotropus longiventris	Thomson, 1890
Arthropoda	Insecta	Hymenoptera	Ichneumonidae	Diplazontinae		Homotropus	Homotropus megaspis	Thomson, 1890
Arthropoda	Insecta	Hymenoptera	Ichneumonidae	Diplazontinae		Homotropus	Homotropus nigritarsus	(Gravenhorst, 1829)
Arthropoda	Insecta	Hymenoptera	Ichneumonidae	Diplazontinae		Homotropus	Homotropus pallipes	(Gravenhorst, 1829)
Arthropoda	Insecta	Hymenoptera	Ichneumonidae	Diplazontinae		Homotropus	Homotropus pictus	(Gravenhorst, 1829)
Arthropoda	Insecta	Hymenoptera	Ichneumonidae	Diplazontinae		Homotropus	Homotropus signatus	(Gravenhorst, 1829)
Arthropoda	Insecta	Hymenoptera	Ichneumonidae	Diplazontinae		Homotropus	Homotropus strigator	(Fabricius, 1793)
Arthropoda	Insecta	Hymenoptera	Ichneumonidae	Diplazontinae		Homotropus	Homotropus sundevalli	(Holmgren, 1858)
Arthropoda	Insecta	Hymenoptera	Ichneumonidae	Diplazontinae		Phthorima	Phthorima compressa	(Desvignes, 1856)
Arthropoda	Insecta	Hymenoptera	Ichneumonidae	Diplazontinae		Phthorima	Phthorima picta	(Habermehl, 1925)
Arthropoda	Insecta	Hymenoptera	Ichneumonidae	Diplazontinae		Phthorima	Phthorima xanthaspis	(Thomson, 1890)
Arthropoda	Insecta	Hymenoptera	Ichneumonidae	Diplazontinae		Promethes	Promethes bridgmani	Fitton, 1976
Arthropoda	Insecta	Hymenoptera	Ichneumonidae	Diplazontinae		Promethes	Promethes melanaspis	(Thomson, 1890)
Arthropoda	Insecta	Hymenoptera	Ichneumonidae	Diplazontinae		Promethes	Promethes nigriventris	(Thomson, 1890)
Arthropoda	Insecta	Hymenoptera	Ichneumonidae	Diplazontinae		Promethes	Promethes sulcator	(Gravenhorst, 1829)
Arthropoda	Insecta	Hymenoptera	Ichneumonidae	Diplazontinae		Sussaba	Sussaba aciculata	(Ruthe, 1859)
Arthropoda	Insecta	Hymenoptera	Ichneumonidae	Diplazontinae		Sussaba	Sussaba cognata	(Holmgren, 1858)
Arthropoda	Insecta	Hymenoptera	Ichneumonidae	Diplazontinae		Sussaba	Sussaba dorsalis	(Holmgren, 1858)
Arthropoda	Insecta	Hymenoptera	Ichneumonidae	Diplazontinae		Sussaba	Sussaba erigator	(Fabricius, 1793)
Arthropoda	Insecta	Hymenoptera	Ichneumonidae	Diplazontinae		Sussaba	Sussaba flavipes	(Lucas, 1849)
Arthropoda	Insecta	Hymenoptera	Ichneumonidae	Diplazontinae		Sussaba	Sussaba placita	Dasch, 1964
Arthropoda	Insecta	Hymenoptera	Ichneumonidae	Diplazontinae		Sussaba	Sussaba pulchella	(Holmgren, 1858)
Arthropoda	Insecta	Hymenoptera	Ichneumonidae	Diplazontinae		Sussaba	Sussaba punctiventris	(Thomson, 1890)
Arthropoda	Insecta	Hymenoptera	Ichneumonidae	Diplazontinae		Sussaba	Sussaba roberti	Klopfstein, 2014
Arthropoda	Insecta	Hymenoptera	Ichneumonidae	Diplazontinae		Syrphoctonus	Syrphoctonus fissorius	(Gravenhorst, 1829)
Arthropoda	Insecta	Hymenoptera	Ichneumonidae	Diplazontinae		Syrphoctonus	Syrphoctonus idari	Diller, 1985
Arthropoda	Insecta	Hymenoptera	Ichneumonidae	Diplazontinae		Syrphoctonus	Syrphoctonus tarsatorius	(Panzer, 1809)
Arthropoda	Insecta	Hymenoptera	Ichneumonidae	Diplazontinae		Syrphophilus	Syrphophilus asperatus	Dasch, 1964
Arthropoda	Insecta	Hymenoptera	Ichneumonidae	Diplazontinae		Syrphophilus	Syrphophilus bizonarius	(Gravenhorst, 1829)
Arthropoda	Insecta	Hymenoptera	Ichneumonidae	Diplazontinae		Syrphophilus	Syrphophilus tricinctorius	(Thunberg, 1824)
Arthropoda	Insecta	Hymenoptera	Ichneumonidae	Diplazontinae		Tymmophorus	Tymmophorus erythrozonus	(Förster, 1850)
Arthropoda	Insecta	Hymenoptera	Ichneumonidae	Diplazontinae		Tymmophorus	Tymmophorus obscuripes	(Holmgren, 1858)
Arthropoda	Insecta	Hymenoptera	Ichneumonidae	Diplazontinae		Tymmophorus	Tymmophorus suspiciosus	(Brischke, 1871)
Arthropoda	Insecta	Hymenoptera	Ichneumonidae	Diplazontinae		Woldstedtius	Woldstedtius biguttatus	(Gravenhorst, 1829)
Arthropoda	Insecta	Hymenoptera	Ichneumonidae	Diplazontinae		Woldstedtius	Woldstedtius citropectoralis	(Schmiedeknecht, 1926)
Arthropoda	Insecta	Hymenoptera	Ichneumonidae	Diplazontinae		Woldstedtius	Woldstedtius flavolineatus	(Gravenhorst, 1829)
Arthropoda	Insecta	Hymenoptera	Ichneumonidae	Diplazontinae		Woldstedtius	Woldstedtius holarcticus	(Diller, 1969)
Arthropoda	Insecta	Hymenoptera	Ichneumonidae	Diplazontinae		Woldstedtius	Woldstedtius melanocnemis	(Bauer, 1981)
Arthropoda	Insecta	Hymenoptera	Ichneumonidae	Diplazontinae		Woldstedtius	Woldstedtius merkli	Vas, 2016
Arthropoda	Insecta	Hymenoptera	Ichneumonidae	Diplazontinae		Woldstedtius	Woldstedtius nigrolineatops	(Bauer, 1981)
Arthropoda	Insecta	Hymenoptera	Ichneumonidae	Diplazontinae		Xestopelta	Xestopelta gracillima	(Schmiedeknecht, 1926)
Arthropoda	Insecta	Hymenoptera	Ichneumonidae	Diplazontinae		Xestopelta	Xestopelta sexcincta	(Brauns, 1896)
Arthropoda	Insecta	Hymenoptera	Ichneumonidae	Eucerotinae		Euceros	Euceros albitarsus	Curtis, 1837
Arthropoda	Insecta	Hymenoptera	Ichneumonidae	Eucerotinae		Euceros	Euceros kiushuensis	Uchida, 1958
Arthropoda	Insecta	Hymenoptera	Ichneumonidae	Eucerotinae		Euceros	Euceros pruinosus	(Gravenhorst, 1829)
Arthropoda	Insecta	Hymenoptera	Ichneumonidae	Eucerotinae		Euceros	Euceros serricornis	(Haliday, 1838)
Arthropoda	Insecta	Hymenoptera	Ichneumonidae	Hybrizontinae	Hybrizontini	Ghilaromma	Ghilaromma fuliginosi	(Wilkinson, 1930)
Arthropoda	Insecta	Hymenoptera	Ichneumonidae	Hybrizontinae	Hybrizontini	Hybrizon	Hybrizon buccatus	(Brebisson, 1825)
Arthropoda	Insecta	Hymenoptera	Ichneumonidae	Hybrizontinae	Hybrizontini	Hybrizon	Hybrizon ghilarovi	Tobias, 1988
Arthropoda	Insecta	Hymenoptera	Ichneumonidae	Hybrizontinae	Hybrizontini	Hybrizon	Hybrizon pilialatus	Tobias, 1988
Arthropoda	Insecta	Hymenoptera	Ichneumonidae	Hybrizontinae	Hybrizontini	Ogkosoma	Ogkosoma cremieri	(Romand, 1838)
Arthropoda	Insecta	Hymenoptera	Ichneumonidae	Ichneumoninae	Alomyini	Alomya	Alomya debellator	(Fabricius, 1775)
Arthropoda	Insecta	Hymenoptera	Ichneumonidae	Ichneumoninae	Alomyini	Alomya	Alomya punctalata	(Schellenberg, 1802)
Arthropoda	Insecta	Hymenoptera	Ichneumonidae	Ichneumoninae	Alomyini	Alomya	Alomya pygmaea	Heinrich, 1949
Arthropoda	Insecta	Hymenoptera	Ichneumonidae	Ichneumoninae	Alomyini	Alomya	Alomya semiflava	Stephens, 1835
Arthropoda	Insecta	Hymenoptera	Ichneumonidae	Ichneumoninae	Eurylabini	Eurylabus	Eurylabus larvatus	(Christ, 1791)
Arthropoda	Insecta	Hymenoptera	Ichneumonidae	Ichneumoninae	Eurylabini	Eurylabus	Eurylabus torvus	Wesmael, 1845
Arthropoda	Insecta	Hymenoptera	Ichneumonidae	Ichneumoninae	Eurylabini	Eurylabus	Eurylabus tristis	(Gravenhorst, 1829)
Arthropoda	Insecta	Hymenoptera	Ichneumonidae	Ichneumoninae	Goedartiini	Goedartia	Goedartia alboguttata	(Gravenhorst, 1829)
Arthropoda	Insecta	Hymenoptera	Ichneumonidae	Ichneumoninae	Heresiarchini	Aglaojoppa	Aglaojoppa centummaculata	(Christ, 1791)
Arthropoda	Insecta	Hymenoptera	Ichneumonidae	Ichneumoninae	Heresiarchini	Amblyjoppa	Amblyjoppa fuscipennis	(Wesmael, 1845)
Arthropoda	Insecta	Hymenoptera	Ichneumonidae	Ichneumoninae	Heresiarchini	Amblyjoppa	Amblyjoppa proteus	(Christ, 1791)
Arthropoda	Insecta	Hymenoptera	Ichneumonidae	Ichneumoninae	Heresiarchini	Callajoppa	Callajoppa cirrogaster	(Schrank, 1781)
Arthropoda	Insecta	Hymenoptera	Ichneumonidae	Ichneumoninae	Heresiarchini	Callajoppa	Callajoppa exaltatoria	(Panzer, 1804)
Arthropoda	Insecta	Hymenoptera	Ichneumonidae	Ichneumoninae	Heresiarchini	Catadelphus	Catadelphus arrogator	(Fabricius, 1781)
Arthropoda	Insecta	Hymenoptera	Ichneumonidae	Ichneumoninae	Heresiarchini	Coelichneumon	Coelichneumon albicillus	(Gravenhorst, 1820)
Arthropoda	Insecta	Hymenoptera	Ichneumonidae	Ichneumoninae	Heresiarchini	Coelichneumon	Coelichneumon anthrax	(Dalla Torre, 1901)
Arthropoda	Insecta	Hymenoptera	Ichneumonidae	Ichneumoninae	Heresiarchini	Coelichneumon	Coelichneumon atratorius	(Villers, 1789)
Arthropoda	Insecta	Hymenoptera	Ichneumonidae	Ichneumoninae	Heresiarchini	Coelichneumon	Coelichneumon biannulatus	(Gravenhorst, 1820)
Arthropoda	Insecta	Hymenoptera	Ichneumonidae	Ichneumoninae	Heresiarchini	Coelichneumon	Coelichneumon biguttorius	(Thunberg, 1789)
Arthropoda	Insecta	Hymenoptera	Ichneumonidae	Ichneumoninae	Heresiarchini	Coelichneumon	Coelichneumon biguttulatus	(Kriechbaumer, 1875)
Arthropoda	Insecta	Hymenoptera	Ichneumonidae	Ichneumoninae	Heresiarchini	Coelichneumon	Coelichneumon bilineatus	(Gmelin, 1790)
Arthropoda	Insecta	Hymenoptera	Ichneumonidae	Ichneumoninae	Heresiarchini	Coelichneumon	Coelichneumon bohemani	(Holmgren, 1864)
Arthropoda	Insecta	Hymenoptera	Ichneumonidae	Ichneumoninae	Heresiarchini	Coelichneumon	Coelichneumon comitator	(Linnaeus, 1758)
Arthropoda	Insecta	Hymenoptera	Ichneumonidae	Ichneumoninae	Heresiarchini	Coelichneumon	Coelichneumon consimilis	(Wesmael, 1845)
Arthropoda	Insecta	Hymenoptera	Ichneumonidae	Ichneumoninae	Heresiarchini	Coelichneumon	Coelichneumon cretatus	(Gravenhorst, 1820)
Arthropoda	Insecta	Hymenoptera	Ichneumonidae	Ichneumoninae	Heresiarchini	Coelichneumon	Coelichneumon cyaniventris	(Wesmael, 1859)
Arthropoda	Insecta	Hymenoptera	Ichneumonidae	Ichneumoninae	Heresiarchini	Coelichneumon	Coelichneumon desinatorius	(Thunberg, 1824)
Arthropoda	Insecta	Hymenoptera	Ichneumonidae	Ichneumoninae	Heresiarchini	Coelichneumon	Coelichneumon dorsosignatus	(Berthoumieu & Eversmann, 1894)
Arthropoda	Insecta	Hymenoptera	Ichneumonidae	Ichneumoninae	Heresiarchini	Coelichneumon	Coelichneumon dubius	(Tischbein, 1876)
Arthropoda	Insecta	Hymenoptera	Ichneumonidae	Ichneumoninae	Heresiarchini	Coelichneumon	Coelichneumon eburnifrons	(Wesmael, 1857)
Arthropoda	Insecta	Hymenoptera	Ichneumonidae	Ichneumoninae	Heresiarchini	Coelichneumon	Coelichneumon erythromerus	(Rudow, 1888)
Arthropoda	Insecta	Hymenoptera	Ichneumonidae	Ichneumoninae	Heresiarchini	Coelichneumon	Coelichneumon falsificus	(Wesmael, 1845)
Arthropoda	Insecta	Hymenoptera	Ichneumonidae	Ichneumoninae	Heresiarchini	Coelichneumon	Coelichneumon funebrator	Horstmann, 2006
Arthropoda	Insecta	Hymenoptera	Ichneumonidae	Ichneumoninae	Heresiarchini	Coelichneumon	Coelichneumon haemorrhoidalis	(Gravenhorst, 1820)
Arthropoda	Insecta	Hymenoptera	Ichneumonidae	Ichneumoninae	Heresiarchini	Coelichneumon	Coelichneumon impressor	(Zetterstedt, 1838)
Arthropoda	Insecta	Hymenoptera	Ichneumonidae	Ichneumoninae	Heresiarchini	Coelichneumon	Coelichneumon leucocerus	(Gravenhorst, 1820)
Arthropoda	Insecta	Hymenoptera	Ichneumonidae	Ichneumoninae	Heresiarchini	Coelichneumon	Coelichneumon moestus	(Gravenhorst, 1829)
Arthropoda	Insecta	Hymenoptera	Ichneumonidae	Ichneumoninae	Heresiarchini	Coelichneumon	Coelichneumon nigerrimus	(Stephens, 1835)
Arthropoda	Insecta	Hymenoptera	Ichneumonidae	Ichneumoninae	Heresiarchini	Coelichneumon	Coelichneumon nobilis	(Wesmael, 1857)
Arthropoda	Insecta	Hymenoptera	Ichneumonidae	Ichneumoninae	Heresiarchini	Coelichneumon	Coelichneumon ophiusae	(Kriechbaumer, 1890)
Arthropoda	Insecta	Hymenoptera	Ichneumonidae	Ichneumoninae	Heresiarchini	Coelichneumon	Coelichneumon opulentus	(Taschenberg, 1871)
Arthropoda	Insecta	Hymenoptera	Ichneumonidae	Ichneumoninae	Heresiarchini	Coelichneumon	Coelichneumon orbitator	(Thunberg, 1824)
Arthropoda	Insecta	Hymenoptera	Ichneumonidae	Ichneumoninae	Heresiarchini	Coelichneumon	Coelichneumon probator	Horstmann, 2000
Arthropoda	Insecta	Hymenoptera	Ichneumonidae	Ichneumoninae	Heresiarchini	Coelichneumon	Coelichneumon quadriannulatus	(Gravenhorst, 1829)
Arthropoda	Insecta	Hymenoptera	Ichneumonidae	Ichneumoninae	Heresiarchini	Coelichneumon	Coelichneumon ruficauda	(Wesmael, 1845)
Arthropoda	Insecta	Hymenoptera	Ichneumonidae	Ichneumoninae	Heresiarchini	Coelichneumon	Coelichneumon sinister	(Wesmael, 1848)
Arthropoda	Insecta	Hymenoptera	Ichneumonidae	Ichneumoninae	Heresiarchini	Coelichneumon	Coelichneumon sugillatorius	(Linnaeus, 1758)
Arthropoda	Insecta	Hymenoptera	Ichneumonidae	Ichneumoninae	Heresiarchini	Coelichneumon	Coelichneumon torsor	(Thunberg, 1824)
Arthropoda	Insecta	Hymenoptera	Ichneumonidae	Ichneumoninae	Heresiarchini	Coelichneumon	Coelichneumon validus	(Berthoumieu, 1894)
Arthropoda	Insecta	Hymenoptera	Ichneumonidae	Ichneumoninae	Heresiarchini	Coelichneumonops	Coelichneumonops solutus	(Holmgren, 1864)
Arthropoda	Insecta	Hymenoptera	Ichneumonidae	Ichneumoninae	Heresiarchini	Heresiarches	Heresiarches eudoxius	(Wesmael, 1845)
Arthropoda	Insecta	Hymenoptera	Ichneumonidae	Ichneumoninae	Heresiarchini	Lymantrichneumon	Lymantrichneumon disparis	(Poda, 1761)
Arthropoda	Insecta	Hymenoptera	Ichneumonidae	Ichneumoninae	Heresiarchini	Protichneumon	Protichneumon fusorius	(Linnaeus, 1761)
Arthropoda	Insecta	Hymenoptera	Ichneumonidae	Ichneumoninae	Heresiarchini	Protichneumon	Protichneumon jesperi	(Holmgren, 1886)
Arthropoda	Insecta	Hymenoptera	Ichneumonidae	Ichneumoninae	Heresiarchini	Protichneumon	Protichneumon pisorius	(Linnaeus, 1758)
Arthropoda	Insecta	Hymenoptera	Ichneumonidae	Ichneumoninae	Heresiarchini	Protichneumon	Protichneumon similatorius	(Fabricius, 1798)
Arthropoda	Insecta	Hymenoptera	Ichneumonidae	Ichneumoninae	Heresiarchini	Psilomastax	Psilomastax pyramidalis	Tischbein, 1868
Arthropoda	Insecta	Hymenoptera	Ichneumonidae	Ichneumoninae	Heresiarchini	Syspasis	Syspasis albiguttata	(Gravenhorst, 1820)
Arthropoda	Insecta	Hymenoptera	Ichneumonidae	Ichneumoninae	Heresiarchini	Syspasis	Syspasis carinator	(Fabricius, 1798)
Arthropoda	Insecta	Hymenoptera	Ichneumonidae	Ichneumoninae	Heresiarchini	Syspasis	Syspasis haesitator	(Wesmael, 1845)
Arthropoda	Insecta	Hymenoptera	Ichneumonidae	Ichneumoninae	Heresiarchini	Syspasis	Syspasis lineator	(Fabricius, 1781)
Arthropoda	Insecta	Hymenoptera	Ichneumonidae	Ichneumoninae	Heresiarchini	Syspasis	Syspasis optica	(Gravenhorst, 1829)
Arthropoda	Insecta	Hymenoptera	Ichneumonidae	Ichneumoninae	Heresiarchini	Syspasis	Syspasis puerulus	(Kriechbaumer, 1890)
Arthropoda	Insecta	Hymenoptera	Ichneumonidae	Ichneumoninae	Heresiarchini	Syspasis	Syspasis rufina	(Gravenhorst, 1820)
Arthropoda	Insecta	Hymenoptera	Ichneumonidae	Ichneumoninae	Heresiarchini	Syspasis	Syspasis scutellator	(Gravenhorst, 1829)
Arthropoda	Insecta	Hymenoptera	Ichneumonidae	Ichneumoninae	Heresiarchini	Syspasis	Syspasis simulosa	(Thomson, 1886)
Arthropoda	Insecta	Hymenoptera	Ichneumonidae	Ichneumoninae	Heresiarchini	Syspasis	Syspasis tauma	(Heinrich, 1951)
Arthropoda	Insecta	Hymenoptera	Ichneumonidae	Ichneumoninae	Heresiarchini	Trogus	Trogus lapidator	(Fabricius, 1787)
Arthropoda	Insecta	Hymenoptera	Ichneumonidae	Ichneumoninae	Ichneumonini	Achaius	Achaius margineguttatus	(Gravenhorst, 1829)
Arthropoda	Insecta	Hymenoptera	Ichneumonidae	Ichneumoninae	Ichneumonini	Achaius	Achaius oratorius	(Fabricius, 1793)
Arthropoda	Insecta	Hymenoptera	Ichneumonidae	Ichneumoninae	Ichneumonini	Acolobus	Acolobus sericeus	Wesmael, 1845
Arthropoda	Insecta	Hymenoptera	Ichneumonidae	Ichneumoninae	Ichneumonini	Amblyteles	Amblyteles armatorius	(Forster, 1771)
Arthropoda	Insecta	Hymenoptera	Ichneumonidae	Ichneumoninae	Ichneumonini	Anisopygus	Anisopygus pseudonymus	(Wesmael, 1845)
Arthropoda	Insecta	Hymenoptera	Ichneumonidae	Ichneumoninae	Ichneumonini	Aoplus	Aoplus altercator	(Wesmael, 1855)
Arthropoda	Insecta	Hymenoptera	Ichneumonidae	Ichneumoninae	Ichneumonini	Aoplus	Aoplus biannulatorius	(Thunberg, 1824)
Arthropoda	Insecta	Hymenoptera	Ichneumonidae	Ichneumoninae	Ichneumonini	Aoplus	Aoplus castaneus	(Gravenhorst, 1820)
Arthropoda	Insecta	Hymenoptera	Ichneumonidae	Ichneumoninae	Ichneumonini	Aoplus	Aoplus defraudator	(Wesmael, 1845)
Arthropoda	Insecta	Hymenoptera	Ichneumonidae	Ichneumoninae	Ichneumonini	Aoplus	Aoplus deletus	(Wesmael, 1845)
Arthropoda	Insecta	Hymenoptera	Ichneumonidae	Ichneumoninae	Ichneumonini	Aoplus	Aoplus lugubris	(Berthoumieu, 1896)
Arthropoda	Insecta	Hymenoptera	Ichneumonidae	Ichneumoninae	Ichneumonini	Aoplus	Aoplus mustela	(Kriechbaumer, 1895)
Arthropoda	Insecta	Hymenoptera	Ichneumonidae	Ichneumoninae	Ichneumonini	Aoplus	Aoplus ochropis	(Gmelin, 1790)
Arthropoda	Insecta	Hymenoptera	Ichneumonidae	Ichneumoninae	Ichneumonini	Aoplus	Aoplus personatus	(Gravenhorst, 1829)
Arthropoda	Insecta	Hymenoptera	Ichneumonidae	Ichneumoninae	Ichneumonini	Aoplus	Aoplus rubricosus	(Holmgren, 1864)
Arthropoda	Insecta	Hymenoptera	Ichneumonidae	Ichneumoninae	Ichneumonini	Aoplus	Aoplus ruficeps	(Gravenhorst, 1829)
Arthropoda	Insecta	Hymenoptera	Ichneumonidae	Ichneumoninae	Ichneumonini	Aoplus	Aoplus theresae	(Berthoumieu, 1896)
Arthropoda	Insecta	Hymenoptera	Ichneumonidae	Ichneumoninae	Ichneumonini	Aoplus	Aoplus torpidus	(Wesmael, 1857)
Arthropoda	Insecta	Hymenoptera	Ichneumonidae	Ichneumoninae	Ichneumonini	Baranisobas	Baranisobas ridibundus	(Gravenhorst, 1829)
Arthropoda	Insecta	Hymenoptera	Ichneumonidae	Ichneumoninae	Ichneumonini	Barichneumon	Barichneumon albicaudatus	(Fonscolombe, 1847)
Arthropoda	Insecta	Hymenoptera	Ichneumonidae	Ichneumoninae	Ichneumonini	Barichneumon	Barichneumon anator	(Fabricius, 1793)
Arthropoda	Insecta	Hymenoptera	Ichneumonidae	Ichneumoninae	Ichneumonini	Barichneumon	Barichneumon bilunulatus	(Gravenhorst, 1829)
Arthropoda	Insecta	Hymenoptera	Ichneumonidae	Ichneumoninae	Ichneumonini	Barichneumon	Barichneumon chionomus	(Wesmael, 1845)
Arthropoda	Insecta	Hymenoptera	Ichneumonidae	Ichneumoninae	Ichneumonini	Barichneumon	Barichneumon derogator	(Wesmael, 1845)
Arthropoda	Insecta	Hymenoptera	Ichneumonidae	Ichneumoninae	Ichneumonini	Barichneumon	Barichneumon fumipennis	(Gravenhorst, 1829)
Arthropoda	Insecta	Hymenoptera	Ichneumonidae	Ichneumoninae	Ichneumonini	Barichneumon	Barichneumon gemellus	(Gravenhorst, 1829)
Arthropoda	Insecta	Hymenoptera	Ichneumonidae	Ichneumoninae	Ichneumonini	Barichneumon	Barichneumon lituratae	(Hartig, 1838)
Arthropoda	Insecta	Hymenoptera	Ichneumonidae	Ichneumoninae	Ichneumonini	Barichneumon	Barichneumon nigrifemur	(Tischbein, 1881)
Arthropoda	Insecta	Hymenoptera	Ichneumonidae	Ichneumoninae	Ichneumonini	Barichneumon	Barichneumon nubilis	(Brischke, 1891)
Arthropoda	Insecta	Hymenoptera	Ichneumonidae	Ichneumoninae	Ichneumonini	Barichneumon	Barichneumon peregrinator	(Linnaeus, 1758)
Arthropoda	Insecta	Hymenoptera	Ichneumonidae	Ichneumoninae	Ichneumonini	Barichneumon	Barichneumon plagiarius	(Wesmael, 1848)
Arthropoda	Insecta	Hymenoptera	Ichneumonidae	Ichneumoninae	Ichneumonini	Barichneumon	Barichneumon praeceptor	(Thunberg, 1824)
Arthropoda	Insecta	Hymenoptera	Ichneumonidae	Ichneumoninae	Ichneumonini	Barichneumon	Barichneumon rhenanus	(Habermehl, 1916)
Arthropoda	Insecta	Hymenoptera	Ichneumonidae	Ichneumoninae	Ichneumonini	Barichneumon	Barichneumon scopulatus	Tereshkin, 2004
Arthropoda	Insecta	Hymenoptera	Ichneumonidae	Ichneumoninae	Ichneumonini	Barichneumon	Barichneumon sedulus	(Gravenhorst, 1820)
Arthropoda	Insecta	Hymenoptera	Ichneumonidae	Ichneumoninae	Ichneumonini	Barichneumon	Barichneumon sexalbatus	(Gravenhorst, 1820)
Arthropoda	Insecta	Hymenoptera	Ichneumonidae	Ichneumoninae	Ichneumonini	Barichneumon	Barichneumon tibialis	(Brischke, 1878)
Arthropoda	Insecta	Hymenoptera	Ichneumonidae	Ichneumoninae	Ichneumonini	Chasmias	Chasmias motatorius	(Fabricius, 1775)
Arthropoda	Insecta	Hymenoptera	Ichneumonidae	Ichneumoninae	Ichneumonini	Chasmias	Chasmias paludator	(Desvignes, 1854)
Arthropoda	Insecta	Hymenoptera	Ichneumonidae	Ichneumoninae	Ichneumonini	Cratichneumon	Cratichneumon albifrons	(Stephens, 1835)
Arthropoda	Insecta	Hymenoptera	Ichneumonidae	Ichneumoninae	Ichneumonini	Cratichneumon	Cratichneumon armillatops	Rasnitsyn, 1981
Arthropoda	Insecta	Hymenoptera	Ichneumonidae	Ichneumoninae	Ichneumonini	Cratichneumon	Cratichneumon coruscator	(Linnaeus, 1758)
Arthropoda	Insecta	Hymenoptera	Ichneumonidae	Ichneumoninae	Ichneumonini	Cratichneumon	Cratichneumon culex	(Müller, 1776)
Arthropoda	Insecta	Hymenoptera	Ichneumonidae	Ichneumoninae	Ichneumonini	Cratichneumon	Cratichneumon declinans	(Kriechbaumer, 1897)
Arthropoda	Insecta	Hymenoptera	Ichneumonidae	Ichneumoninae	Ichneumonini	Cratichneumon	Cratichneumon dissimilis	(Gravenhorst, 1829)
Arthropoda	Insecta	Hymenoptera	Ichneumonidae	Ichneumoninae	Ichneumonini	Cratichneumon	Cratichneumon flavifrons	(Schrank, 1781)
Arthropoda	Insecta	Hymenoptera	Ichneumonidae	Ichneumoninae	Ichneumonini	Cratichneumon	Cratichneumon fugitivus	(Gravenhorst, 1829)
Arthropoda	Insecta	Hymenoptera	Ichneumonidae	Ichneumoninae	Ichneumonini	Cratichneumon	Cratichneumon infidus	(Wesmael, 1848)
Arthropoda	Insecta	Hymenoptera	Ichneumonidae	Ichneumoninae	Ichneumonini	Cratichneumon	Cratichneumon interfector	(Tischbein, 1868)
Arthropoda	Insecta	Hymenoptera	Ichneumonidae	Ichneumoninae	Ichneumonini	Cratichneumon	Cratichneumon jocularis	(Wesmael, 1848)
Arthropoda	Insecta	Hymenoptera	Ichneumonidae	Ichneumoninae	Ichneumonini	Cratichneumon	Cratichneumon lancea	(Dalla Torre, 1901)
Arthropoda	Insecta	Hymenoptera	Ichneumonidae	Ichneumoninae	Ichneumonini	Cratichneumon	Cratichneumon luteiventris	(Gravenhorst, 1820)
Arthropoda	Insecta	Hymenoptera	Ichneumonidae	Ichneumoninae	Ichneumonini	Cratichneumon	Cratichneumon pallitarsis	(Thomson, 1887)
Arthropoda	Insecta	Hymenoptera	Ichneumonidae	Ichneumoninae	Ichneumonini	Cratichneumon	Cratichneumon pratincola	Heinrich, 1952
Arthropoda	Insecta	Hymenoptera	Ichneumonidae	Ichneumoninae	Ichneumonini	Cratichneumon	Cratichneumon pygmaeus	(Habermehl, 1925)
Arthropoda	Insecta	Hymenoptera	Ichneumonidae	Ichneumoninae	Ichneumonini	Cratichneumon	Cratichneumon rufifrons	(Gravenhorst, 1829)
Arthropoda	Insecta	Hymenoptera	Ichneumonidae	Ichneumoninae	Ichneumonini	Cratichneumon	Cratichneumon semirufus	(Gravenhorst, 1820)
Arthropoda	Insecta	Hymenoptera	Ichneumonidae	Ichneumoninae	Ichneumonini	Cratichneumon	Cratichneumon sexarmillatus	(Kriechbaumer, 1891)
Arthropoda	Insecta	Hymenoptera	Ichneumonidae	Ichneumoninae	Ichneumonini	Cratichneumon	Cratichneumon sicarius	(Gravenhorst, 1829)
Arthropoda	Insecta	Hymenoptera	Ichneumonidae	Ichneumoninae	Ichneumonini	Cratichneumon	Cratichneumon spilomerus	(Kriechbaumer, 1888)
Arthropoda	Insecta	Hymenoptera	Ichneumonidae	Ichneumoninae	Ichneumonini	Cratichneumon	Cratichneumon versator	(Thunberg, 1824)
Arthropoda	Insecta	Hymenoptera	Ichneumonidae	Ichneumoninae	Ichneumonini	Cratichneumon	Cratichneumon viator	(Scopoli, 1763)
Arthropoda	Insecta	Hymenoptera	Ichneumonidae	Ichneumoninae	Ichneumonini	Cratichneumon	Cratichneumon vulpecula	(Kriechbaumer, 1875)
Arthropoda	Insecta	Hymenoptera	Ichneumonidae	Ichneumoninae	Ichneumonini	Crypteffigies	Crypteffigies albilarvatus	(Gravenhorst, 1820)
Arthropoda	Insecta	Hymenoptera	Ichneumonidae	Ichneumoninae	Ichneumonini	Crypteffigies	Crypteffigies lanius	(Gravenhorst, 1829)
Arthropoda	Insecta	Hymenoptera	Ichneumonidae	Ichneumoninae	Ichneumonini	Crypteffigies	Crypteffigies pseudocryptus	(Wesmael, 1857)
Arthropoda	Insecta	Hymenoptera	Ichneumonidae	Ichneumoninae	Ichneumonini	Crypteffigies	Crypteffigies tenuicinctus	(Schmiedeknecht, 1928)
Arthropoda	Insecta	Hymenoptera	Ichneumonidae	Ichneumoninae	Ichneumonini	Crytea	Crytea erythraea	(Gravenhorst, 1820)
Arthropoda	Insecta	Hymenoptera	Ichneumonidae	Ichneumoninae	Ichneumonini	Crytea	Crytea sanguinator	(Rossi, 1794)
Arthropoda	Insecta	Hymenoptera	Ichneumonidae	Ichneumoninae	Ichneumonini	Ctenichneumon	Ctenichneumon castigator	(Fabricius, 1793)
Arthropoda	Insecta	Hymenoptera	Ichneumonidae	Ichneumoninae	Ichneumonini	Ctenichneumon	Ctenichneumon circulator	(Thomson, 1894)
Arthropoda	Insecta	Hymenoptera	Ichneumonidae	Ichneumoninae	Ichneumonini	Ctenichneumon	Ctenichneumon devylderi	(Holmgren, 1871)
Arthropoda	Insecta	Hymenoptera	Ichneumonidae	Ichneumoninae	Ichneumonini	Ctenichneumon	Ctenichneumon divisorius	(Gravenhorst, 1820)
Arthropoda	Insecta	Hymenoptera	Ichneumonidae	Ichneumoninae	Ichneumonini	Ctenichneumon	Ctenichneumon edictorius	(Linnaeus, 1758)
Arthropoda	Insecta	Hymenoptera	Ichneumonidae	Ichneumoninae	Ichneumonini	Ctenichneumon	Ctenichneumon funereus	(Geoffroy, 1785)
Arthropoda	Insecta	Hymenoptera	Ichneumonidae	Ichneumoninae	Ichneumonini	Ctenichneumon	Ctenichneumon inspector	(Wesmael, 1845)
Arthropoda	Insecta	Hymenoptera	Ichneumonidae	Ichneumoninae	Ichneumonini	Ctenichneumon	Ctenichneumon lissonotus	(Holmgren, 1871)
Arthropoda	Insecta	Hymenoptera	Ichneumonidae	Ichneumoninae	Ichneumonini	Ctenichneumon	Ctenichneumon melanocastanus	(Gravenhorst, 1820)
Arthropoda	Insecta	Hymenoptera	Ichneumonidae	Ichneumoninae	Ichneumonini	Ctenichneumon	Ctenichneumon messorius	(Gravenhorst, 1820)
Arthropoda	Insecta	Hymenoptera	Ichneumonidae	Ichneumoninae	Ichneumonini	Ctenichneumon	Ctenichneumon nitens	(Christ, 1791)
Arthropoda	Insecta	Hymenoptera	Ichneumonidae	Ichneumoninae	Ichneumonini	Ctenichneumon	Ctenichneumon panzeri	(Wesmael, 1845)
Arthropoda	Insecta	Hymenoptera	Ichneumonidae	Ichneumoninae	Ichneumonini	Ctenichneumon	Ctenichneumon phragmitecolator	Bauer, 2001
Arthropoda	Insecta	Hymenoptera	Ichneumonidae	Ichneumoninae	Ichneumonini	Ctenichneumon	Ctenichneumon repentinus	(Gravenhorst, 1820)
Arthropoda	Insecta	Hymenoptera	Ichneumonidae	Ichneumoninae	Ichneumonini	Deuterolabops	Deuterolabops eupitheciae	(Brischke, 1878)
Arthropoda	Insecta	Hymenoptera	Ichneumonidae	Ichneumoninae	Ichneumonini	Diphyus	Diphyus amatorius	(Müller, 1776)
Arthropoda	Insecta	Hymenoptera	Ichneumonidae	Ichneumoninae	Ichneumonini	Diphyus	Diphyus ater	(Wesmael, 1855)
Arthropoda	Insecta	Hymenoptera	Ichneumonidae	Ichneumoninae	Ichneumonini	Diphyus	Diphyus bicingulatus	(Gravenhorst, 1829)
Arthropoda	Insecta	Hymenoptera	Ichneumonidae	Ichneumoninae	Ichneumonini	Diphyus	Diphyus castanopyga	(Stephens, 1835)
Arthropoda	Insecta	Hymenoptera	Ichneumonidae	Ichneumoninae	Ichneumonini	Diphyus	Diphyus efferus	(Wesmael, 1854)
Arthropoda	Insecta	Hymenoptera	Ichneumonidae	Ichneumoninae	Ichneumonini	Diphyus	Diphyus fossorius	(Linnaeus, 1758)
Arthropoda	Insecta	Hymenoptera	Ichneumonidae	Ichneumoninae	Ichneumonini	Diphyus	Diphyus gradatorius	(Thunberg, 1824)
Arthropoda	Insecta	Hymenoptera	Ichneumonidae	Ichneumoninae	Ichneumonini	Diphyus	Diphyus latebricola	(Wesmael, 1845)
Arthropoda	Insecta	Hymenoptera	Ichneumonidae	Ichneumoninae	Ichneumonini	Diphyus	Diphyus longigena	(Thomson, 1888)
Arthropoda	Insecta	Hymenoptera	Ichneumonidae	Ichneumoninae	Ichneumonini	Diphyus	Diphyus longimanus	(Wesmael, 1857)
Arthropoda	Insecta	Hymenoptera	Ichneumonidae	Ichneumoninae	Ichneumonini	Diphyus	Diphyus luctatorius	(Linnaeus, 1758)
Arthropoda	Insecta	Hymenoptera	Ichneumonidae	Ichneumoninae	Ichneumonini	Diphyus	Diphyus mercatorius	(Fabricius, 1793)
Arthropoda	Insecta	Hymenoptera	Ichneumonidae	Ichneumoninae	Ichneumonini	Diphyus	Diphyus monitorius	(Panzer, 1801)
Arthropoda	Insecta	Hymenoptera	Ichneumonidae	Ichneumoninae	Ichneumonini	Diphyus	Diphyus ochromelas	(Gmelin, 1790)
Arthropoda	Insecta	Hymenoptera	Ichneumonidae	Ichneumoninae	Ichneumonini	Diphyus	Diphyus palliatorius	(Gravenhorst, 1829)
Arthropoda	Insecta	Hymenoptera	Ichneumonidae	Ichneumoninae	Ichneumonini	Diphyus	Diphyus pedatus	(Berthoumieu, 1895)
Arthropoda	Insecta	Hymenoptera	Ichneumonidae	Ichneumoninae	Ichneumonini	Diphyus	Diphyus politus	(Wesmael, 1855)
Arthropoda	Insecta	Hymenoptera	Ichneumonidae	Ichneumoninae	Ichneumonini	Diphyus	Diphyus quadripunctorius	(Müller, 1776)
Arthropoda	Insecta	Hymenoptera	Ichneumonidae	Ichneumoninae	Ichneumonini	Diphyus	Diphyus quinquecinctus	(Kriechbaumer, 1882)
Arthropoda	Insecta	Hymenoptera	Ichneumonidae	Ichneumoninae	Ichneumonini	Diphyus	Diphyus raptorius	(Linnaeus, 1758)
Arthropoda	Insecta	Hymenoptera	Ichneumonidae	Ichneumoninae	Ichneumonini	Diphyus	Diphyus restitutor	(Wesmael, 1859)
Arthropoda	Insecta	Hymenoptera	Ichneumonidae	Ichneumoninae	Ichneumonini	Diphyus	Diphyus salicatorius	(Gravenhorst, 1820)
Arthropoda	Insecta	Hymenoptera	Ichneumonidae	Ichneumoninae	Ichneumonini	Diphyus	Diphyus septemguttatus	(Gravenhorst, 1829)
Arthropoda	Insecta	Hymenoptera	Ichneumonidae	Ichneumoninae	Ichneumonini	Diphyus	Diphyus tricolor	Kriechbaumer, 1890
Arthropoda	Insecta	Hymenoptera	Ichneumonidae	Ichneumoninae	Ichneumonini	Diphyus	Diphyus trifasciatus	(Gravenhorst, 1829)
Arthropoda	Insecta	Hymenoptera	Ichneumonidae	Ichneumoninae	Ichneumonini	Eristicus	Eristicus clarigator	(Wesmael, 1845)
Arthropoda	Insecta	Hymenoptera	Ichneumonidae	Ichneumoninae	Ichneumonini	Eristicus	Eristicus clericus	(Gravenhorst, 1829)
Arthropoda	Insecta	Hymenoptera	Ichneumonidae	Ichneumoninae	Ichneumonini	Eupalamus	Eupalamus lacteator	(Gravenhorst, 1829)
Arthropoda	Insecta	Hymenoptera	Ichneumonidae	Ichneumoninae	Ichneumonini	Eupalamus	Eupalamus lamentator	(Thunberg, 1824)
Arthropoda	Insecta	Hymenoptera	Ichneumonidae	Ichneumoninae	Ichneumonini	Eupalamus	Eupalamus oscillator	Wesmael, 1845
Arthropoda	Insecta	Hymenoptera	Ichneumonidae	Ichneumoninae	Ichneumonini	Eupalamus	Eupalamus wesmaeli	(Thomson, 1886)
Arthropoda	Insecta	Hymenoptera	Ichneumonidae	Ichneumoninae	Ichneumonini	Eutanyacra	Eutanyacra crispatoria	(Linnaeus, 1758)
Arthropoda	Insecta	Hymenoptera	Ichneumonidae	Ichneumoninae	Ichneumonini	Eutanyacra	Eutanyacra glaucatoria	(Fabricius, 1793)
Arthropoda	Insecta	Hymenoptera	Ichneumonidae	Ichneumoninae	Ichneumonini	Eutanyacra	Eutanyacra pallidicornis	(Gravenhorst, 1829)
Arthropoda	Insecta	Hymenoptera	Ichneumonidae	Ichneumoninae	Ichneumonini	Eutanyacra	Eutanyacra picta	(Schrank, 1776)
Arthropoda	Insecta	Hymenoptera	Ichneumonidae	Ichneumoninae	Ichneumonini	Exephanes	Exephanes femoralis	Brischke, 1878
Arthropoda	Insecta	Hymenoptera	Ichneumonidae	Ichneumoninae	Ichneumonini	Exephanes	Exephanes fulvescens	Vollenhoven, 1875
Arthropoda	Insecta	Hymenoptera	Ichneumonidae	Ichneumoninae	Ichneumonini	Exephanes	Exephanes ischioxanthus	(Gravenhorst, 1829)
Arthropoda	Insecta	Hymenoptera	Ichneumonidae	Ichneumoninae	Ichneumonini	Exephanes	Exephanes occupator	(Gravenhorst, 1829)
Arthropoda	Insecta	Hymenoptera	Ichneumonidae	Ichneumoninae	Ichneumonini	Exephanes	Exephanes rhenanus	Habermehl, 1918
Arthropoda	Insecta	Hymenoptera	Ichneumonidae	Ichneumoninae	Ichneumonini	Exephanes	Exephanes riesei	(Habermehl, 1916)
Arthropoda	Insecta	Hymenoptera	Ichneumonidae	Ichneumoninae	Ichneumonini	Exephanes	Exephanes venustus	(Tischbein, 1876)
Arthropoda	Insecta	Hymenoptera	Ichneumonidae	Ichneumoninae	Ichneumonini	Gareila	Gareila nivata	(Gravenhorst, 1820)
Arthropoda	Insecta	Hymenoptera	Ichneumonidae	Ichneumoninae	Ichneumonini	Gareila	Gareila patruelis	(Holmgren, 1864)
Arthropoda	Insecta	Hymenoptera	Ichneumonidae	Ichneumoninae	Ichneumonini	Gareila	Gareila tenebrosa	(Wesmael, 1845)
Arthropoda	Insecta	Hymenoptera	Ichneumonidae	Ichneumoninae	Ichneumonini	Hepiopelmus	Hepiopelmus melanogaster	(Gmelin, 1790)
Arthropoda	Insecta	Hymenoptera	Ichneumonidae	Ichneumoninae	Ichneumonini	Hepiopelmus	Hepiopelmus variegatorius	(Panzer, 1800)
Arthropoda	Insecta	Hymenoptera	Ichneumonidae	Ichneumoninae	Ichneumonini	Homotherus	Homotherus berthoumieui	(Pic, 1899)
Arthropoda	Insecta	Hymenoptera	Ichneumonidae	Ichneumoninae	Ichneumonini	Homotherus	Homotherus coxistriatus	Riedel, 2020
Arthropoda	Insecta	Hymenoptera	Ichneumonidae	Ichneumoninae	Ichneumonini	Homotherus	Homotherus locutor	(Thunberg, 1824)
Arthropoda	Insecta	Hymenoptera	Ichneumonidae	Ichneumoninae	Ichneumonini	Homotherus	Homotherus magus	(Wesmael, 1855)
Arthropoda	Insecta	Hymenoptera	Ichneumonidae	Ichneumoninae	Ichneumonini	Homotherus	Homotherus varipes	(Gravenhorst, 1829)
Arthropoda	Insecta	Hymenoptera	Ichneumonidae	Ichneumoninae	Ichneumonini	Hoplismenus	Hoplismenus bidentatus	(Gmelin, 1790)
Arthropoda	Insecta	Hymenoptera	Ichneumonidae	Ichneumoninae	Ichneumonini	Hoplismenus	Hoplismenus bispinatorius	(Thunberg, 1824)
Arthropoda	Insecta	Hymenoptera	Ichneumonidae	Ichneumoninae	Ichneumonini	Hoplismenus	Hoplismenus krapinensis	Hensch, 1928
Arthropoda	Insecta	Hymenoptera	Ichneumonidae	Ichneumoninae	Ichneumonini	Hoplismenus	Hoplismenus lamprolabus	Wesmael, 1857
Arthropoda	Insecta	Hymenoptera	Ichneumonidae	Ichneumoninae	Ichneumonini	Hoplismenus	Hoplismenus pica	Wesmael, 1855
Arthropoda	Insecta	Hymenoptera	Ichneumonidae	Ichneumoninae	Ichneumonini	Hoplismenus	Hoplismenus terrificus	Wesmael, 1848
Arthropoda	Insecta	Hymenoptera	Ichneumonidae	Ichneumoninae	Ichneumonini	Hybophorellus	Hybophorellus aulicus	(Gravenhorst, 1829)
Arthropoda	Insecta	Hymenoptera	Ichneumonidae	Ichneumoninae	Ichneumonini	Hybophorellus	Hybophorellus injucundus	(Wesmael, 1854)
Arthropoda	Insecta	Hymenoptera	Ichneumonidae	Ichneumoninae	Ichneumonini	Ichneumon	Ichneumon acuticornis	Thomson, 1896
Arthropoda	Insecta	Hymenoptera	Ichneumonidae	Ichneumoninae	Ichneumonini	Ichneumon	Ichneumon admontis	Hilpert, 1992
Arthropoda	Insecta	Hymenoptera	Ichneumonidae	Ichneumoninae	Ichneumonini	Ichneumon	Ichneumon affector	Tischbein, 1879
Arthropoda	Insecta	Hymenoptera	Ichneumonidae	Ichneumoninae	Ichneumonini	Ichneumon	Ichneumon albiger	Wesmael, 1845
Arthropoda	Insecta	Hymenoptera	Ichneumonidae	Ichneumoninae	Ichneumonini	Ichneumon	Ichneumon albiornatus	Tischbein, 1879
Arthropoda	Insecta	Hymenoptera	Ichneumonidae	Ichneumoninae	Ichneumonini	Ichneumon	Ichneumon alius	Tischbein, 1879
Arthropoda	Insecta	Hymenoptera	Ichneumonidae	Ichneumoninae	Ichneumonini	Ichneumon	Ichneumon altaicola	Heinrich, 1978
Arthropoda	Insecta	Hymenoptera	Ichneumonidae	Ichneumoninae	Ichneumonini	Ichneumon	Ichneumon amphibolus	Kriechbaumer, 1888
Arthropoda	Insecta	Hymenoptera	Ichneumonidae	Ichneumoninae	Ichneumonini	Ichneumon	Ichneumon analis	Gravenhorst, 1829
Arthropoda	Insecta	Hymenoptera	Ichneumonidae	Ichneumoninae	Ichneumonini	Ichneumon	Ichneumon analisorius	Heinrich, 1952
Arthropoda	Insecta	Hymenoptera	Ichneumonidae	Ichneumoninae	Ichneumonini	Ichneumon	Ichneumon balteatus	Wesmael, 1845
Arthropoda	Insecta	Hymenoptera	Ichneumonidae	Ichneumoninae	Ichneumonini	Ichneumon	Ichneumon bavaricus	Hilpert, 1992
Arthropoda	Insecta	Hymenoptera	Ichneumonidae	Ichneumoninae	Ichneumonini	Ichneumon	Ichneumon bellipes	Wesmael, 1845
Arthropoda	Insecta	Hymenoptera	Ichneumonidae	Ichneumoninae	Ichneumonini	Ichneumon	Ichneumon berninae	(Habermehl, 1916)
Arthropoda	Insecta	Hymenoptera	Ichneumonidae	Ichneumoninae	Ichneumonini	Ichneumon	Ichneumon bucculentus	Wesmael, 1845
Arthropoda	Insecta	Hymenoptera	Ichneumonidae	Ichneumoninae	Ichneumonini	Ichneumon	Ichneumon buryas	Heinrich, 1949
Arthropoda	Insecta	Hymenoptera	Ichneumonidae	Ichneumoninae	Ichneumonini	Ichneumon	Ichneumon caedator	Gravenhorst, 1829
Arthropoda	Insecta	Hymenoptera	Ichneumonidae	Ichneumoninae	Ichneumonini	Ichneumon	Ichneumon caloscelis	Wesmael, 1845
Arthropoda	Insecta	Hymenoptera	Ichneumonidae	Ichneumoninae	Ichneumonini	Ichneumon	Ichneumon capriolus	Hilpert, 1992
Arthropoda	Insecta	Hymenoptera	Ichneumonidae	Ichneumoninae	Ichneumonini	Ichneumon	Ichneumon cerebrosus	Wesmael, 1859
Arthropoda	Insecta	Hymenoptera	Ichneumonidae	Ichneumoninae	Ichneumonini	Ichneumon	Ichneumon cerinthius	Gravenhorst, 1820
Arthropoda	Insecta	Hymenoptera	Ichneumonidae	Ichneumoninae	Ichneumonini	Ichneumon	Ichneumon cessator	Müller, 1776
Arthropoda	Insecta	Hymenoptera	Ichneumonidae	Ichneumoninae	Ichneumonini	Ichneumon	Ichneumon cinxiae	Kriechbaumer, 1890
Arthropoda	Insecta	Hymenoptera	Ichneumonidae	Ichneumoninae	Ichneumonini	Ichneumon	Ichneumon computatorius	Müller, 1776
Arthropoda	Insecta	Hymenoptera	Ichneumonidae	Ichneumoninae	Ichneumonini	Ichneumon	Ichneumon confusor	Gravenhorst, 1820
Arthropoda	Insecta	Hymenoptera	Ichneumonidae	Ichneumoninae	Ichneumonini	Ichneumon	Ichneumon coniger	Tischbein, 1876
Arthropoda	Insecta	Hymenoptera	Ichneumonidae	Ichneumoninae	Ichneumonini	Ichneumon	Ichneumon connectens	Roman, 1904
Arthropoda	Insecta	Hymenoptera	Ichneumonidae	Ichneumoninae	Ichneumonini	Ichneumon	Ichneumon crassifemur	Thomson, 1886
Arthropoda	Insecta	Hymenoptera	Ichneumonidae	Ichneumoninae	Ichneumonini	Ichneumon	Ichneumon curtulus	Kriechbaumer, 1882
Arthropoda	Insecta	Hymenoptera	Ichneumonidae	Ichneumoninae	Ichneumonini	Ichneumon	Ichneumon cynthiae	Kriechbaumer, 1888
Arthropoda	Insecta	Hymenoptera	Ichneumonidae	Ichneumoninae	Ichneumonini	Ichneumon	Ichneumon decurtatus	Wesmael, 1845
Arthropoda	Insecta	Hymenoptera	Ichneumonidae	Ichneumoninae	Ichneumonini	Ichneumon	Ichneumon deliratorius	Linnaeus, 1758
Arthropoda	Insecta	Hymenoptera	Ichneumonidae	Ichneumoninae	Ichneumonini	Ichneumon	Ichneumon didymus	Gravenhorst, 1829
Arthropoda	Insecta	Hymenoptera	Ichneumonidae	Ichneumoninae	Ichneumonini	Ichneumon	Ichneumon dilleri	Heinrich, 1980
Arthropoda	Insecta	Hymenoptera	Ichneumonidae	Ichneumoninae	Ichneumonini	Ichneumon	Ichneumon diversor	Wesmael, 1855
Arthropoda	Insecta	Hymenoptera	Ichneumonidae	Ichneumoninae	Ichneumonini	Ichneumon	Ichneumon emancipatus	Wesmael, 1845
Arthropoda	Insecta	Hymenoptera	Ichneumonidae	Ichneumoninae	Ichneumonini	Ichneumon	Ichneumon erythromerus	Wesmael, 1857
Arthropoda	Insecta	Hymenoptera	Ichneumonidae	Ichneumoninae	Ichneumonini	Ichneumon	Ichneumon eumerus	Wesmael, 1857
Arthropoda	Insecta	Hymenoptera	Ichneumonidae	Ichneumoninae	Ichneumonini	Ichneumon	Ichneumon exilicornis	Wesmael, 1857
Arthropoda	Insecta	Hymenoptera	Ichneumonidae	Ichneumoninae	Ichneumonini	Ichneumon	Ichneumon extensorius	Linnaeus, 1758
Arthropoda	Insecta	Hymenoptera	Ichneumonidae	Ichneumoninae	Ichneumonini	Ichneumon	Ichneumon factor	Dalla Torre, 1901
Arthropoda	Insecta	Hymenoptera	Ichneumonidae	Ichneumoninae	Ichneumonini	Ichneumon	Ichneumon flavoclypeatus	Pfeffer, 1913
Arthropoda	Insecta	Hymenoptera	Ichneumonidae	Ichneumoninae	Ichneumonini	Ichneumon	Ichneumon formosus	Gravenhorst, 1829
Arthropoda	Insecta	Hymenoptera	Ichneumonidae	Ichneumoninae	Ichneumonini	Ichneumon	Ichneumon freyi	Kriechbaumer, 1880
Arthropoda	Insecta	Hymenoptera	Ichneumonidae	Ichneumoninae	Ichneumonini	Ichneumon	Ichneumon fulvicornis	Gravenhorst, 1829
Arthropoda	Insecta	Hymenoptera	Ichneumonidae	Ichneumoninae	Ichneumonini	Ichneumon	Ichneumon gibbulus	Thomson, 1886
Arthropoda	Insecta	Hymenoptera	Ichneumonidae	Ichneumoninae	Ichneumonini	Ichneumon	Ichneumon gracilentus	Wesmael, 1845
Arthropoda	Insecta	Hymenoptera	Ichneumonidae	Ichneumoninae	Ichneumonini	Ichneumon	Ichneumon gracilicornis	Gravenhorst, 1829
Arthropoda	Insecta	Hymenoptera	Ichneumonidae	Ichneumoninae	Ichneumonini	Ichneumon	Ichneumon gratus	Wesmael, 1855
Arthropoda	Insecta	Hymenoptera	Ichneumonidae	Ichneumoninae	Ichneumonini	Ichneumon	Ichneumon haematonotus	Wesmael, 1859
Arthropoda	Insecta	Hymenoptera	Ichneumonidae	Ichneumoninae	Ichneumonini	Ichneumon	Ichneumon haemorrhoicus	Kriechbaumer, 1887
Arthropoda	Insecta	Hymenoptera	Ichneumonidae	Ichneumoninae	Ichneumonini	Ichneumon	Ichneumon haeselbarthi	Heinrich, 1973
Arthropoda	Insecta	Hymenoptera	Ichneumonidae	Ichneumoninae	Ichneumonini	Ichneumon	Ichneumon haglundi	Holmgren, 1864
Arthropoda	Insecta	Hymenoptera	Ichneumonidae	Ichneumoninae	Ichneumonini	Ichneumon	Ichneumon hinzi	Heinrich, 1972
Arthropoda	Insecta	Hymenoptera	Ichneumonidae	Ichneumoninae	Ichneumonini	Ichneumon	Ichneumon hypolius	Thomson, 1888
Arthropoda	Insecta	Hymenoptera	Ichneumonidae	Ichneumoninae	Ichneumonini	Ichneumon	Ichneumon ignobilis	Wesmael, 1855
Arthropoda	Insecta	Hymenoptera	Ichneumonidae	Ichneumoninae	Ichneumonini	Ichneumon	Ichneumon ingratus	(Hellén, 1951)
Arthropoda	Insecta	Hymenoptera	Ichneumonidae	Ichneumoninae	Ichneumonini	Ichneumon	Ichneumon inops	Holmgren, 1880
Arthropoda	Insecta	Hymenoptera	Ichneumonidae	Ichneumoninae	Ichneumonini	Ichneumon	Ichneumon inquinatus	Wesmael, 1845
Arthropoda	Insecta	Hymenoptera	Ichneumonidae	Ichneumoninae	Ichneumonini	Ichneumon	Ichneumon insidiosus	Wesmael, 1845
Arthropoda	Insecta	Hymenoptera	Ichneumonidae	Ichneumoninae	Ichneumonini	Ichneumon	Ichneumon intricator	Wesmael, 1855
Arthropoda	Insecta	Hymenoptera	Ichneumonidae	Ichneumoninae	Ichneumonini	Ichneumon	Ichneumon jugicola	Heinrich, 1949
Arthropoda	Insecta	Hymenoptera	Ichneumonidae	Ichneumoninae	Ichneumonini	Ichneumon	Ichneumon karpaticus	Heinrich, 1951
Arthropoda	Insecta	Hymenoptera	Ichneumonidae	Ichneumoninae	Ichneumonini	Ichneumon	Ichneumon languidus	Wesmael, 1845
Arthropoda	Insecta	Hymenoptera	Ichneumonidae	Ichneumoninae	Ichneumonini	Ichneumon	Ichneumon lautatorius	Desvignes, 1856
Arthropoda	Insecta	Hymenoptera	Ichneumonidae	Ichneumoninae	Ichneumonini	Ichneumon	Ichneumon ligatorius	Thunberg, 1824
Arthropoda	Insecta	Hymenoptera	Ichneumonidae	Ichneumoninae	Ichneumonini	Ichneumon	Ichneumon lugens	Gravenhorst, 1829
Arthropoda	Insecta	Hymenoptera	Ichneumonidae	Ichneumoninae	Ichneumonini	Ichneumon	Ichneumon luteipes	Wesmael, 1855
Arthropoda	Insecta	Hymenoptera	Ichneumonidae	Ichneumoninae	Ichneumonini	Ichneumon	Ichneumon macilentus	(Tischbein, 1888)
Arthropoda	Insecta	Hymenoptera	Ichneumonidae	Ichneumoninae	Ichneumonini	Ichneumon	Ichneumon megapodius	Heinrich, 1949
Arthropoda	Insecta	Hymenoptera	Ichneumonidae	Ichneumoninae	Ichneumonini	Ichneumon	Ichneumon melanobatus	Gravenhorst, 1829
Arthropoda	Insecta	Hymenoptera	Ichneumonidae	Ichneumoninae	Ichneumonini	Ichneumon	Ichneumon melanopygus	Wesmael, 1855
Arthropoda	Insecta	Hymenoptera	Ichneumonidae	Ichneumoninae	Ichneumonini	Ichneumon	Ichneumon melanosomus	Wesmael, 1855
Arthropoda	Insecta	Hymenoptera	Ichneumonidae	Ichneumoninae	Ichneumonini	Ichneumon	Ichneumon melanotis	Holmgren, 1864
Arthropoda	Insecta	Hymenoptera	Ichneumonidae	Ichneumoninae	Ichneumonini	Ichneumon	Ichneumon memorator	Wesmael, 1845
Arthropoda	Insecta	Hymenoptera	Ichneumonidae	Ichneumoninae	Ichneumonini	Ichneumon	Ichneumon minutorius	Desvignes, 1856
Arthropoda	Insecta	Hymenoptera	Ichneumonidae	Ichneumoninae	Ichneumonini	Ichneumon	Ichneumon molitorius	Linnaeus, 1761
Arthropoda	Insecta	Hymenoptera	Ichneumonidae	Ichneumoninae	Ichneumonini	Ichneumon	Ichneumon mordax	Kriechbaumer, 1875
Arthropoda	Insecta	Hymenoptera	Ichneumonidae	Ichneumoninae	Ichneumonini	Ichneumon	Ichneumon multipictus	Gravenhorst, 1820
Arthropoda	Insecta	Hymenoptera	Ichneumonidae	Ichneumoninae	Ichneumonini	Ichneumon	Ichneumon novemalbatus	Kriechbaumer, 1875
Arthropoda	Insecta	Hymenoptera	Ichneumonidae	Ichneumoninae	Ichneumonini	Ichneumon	Ichneumon obliteratus	Wesmael, 1855
Arthropoda	Insecta	Hymenoptera	Ichneumonidae	Ichneumoninae	Ichneumonini	Ichneumon	Ichneumon oblongus	Schrank, 1802
Arthropoda	Insecta	Hymenoptera	Ichneumonidae	Ichneumoninae	Ichneumonini	Ichneumon	Ichneumon oviventroides	Hinz, 1975
Arthropoda	Insecta	Hymenoptera	Ichneumonidae	Ichneumoninae	Ichneumonini	Ichneumon	Ichneumon palugracilicornis	Bauer, 1999
Arthropoda	Insecta	Hymenoptera	Ichneumonidae	Ichneumoninae	Ichneumonini	Ichneumon	Ichneumon parengensis	Kiss, 1929
Arthropoda	Insecta	Hymenoptera	Ichneumonidae	Ichneumoninae	Ichneumonini	Ichneumon	Ichneumon phaeostigmus	Wesmael, 1857
Arthropoda	Insecta	Hymenoptera	Ichneumonidae	Ichneumoninae	Ichneumonini	Ichneumon	Ichneumon porcellus	Hilpert, 1992
Arthropoda	Insecta	Hymenoptera	Ichneumonidae	Ichneumoninae	Ichneumonini	Ichneumon	Ichneumon primatorius	Forster, 1771
Arthropoda	Insecta	Hymenoptera	Ichneumonidae	Ichneumoninae	Ichneumonini	Ichneumon	Ichneumon proletarius	Wesmael, 1848
Arthropoda	Insecta	Hymenoptera	Ichneumonidae	Ichneumoninae	Ichneumonini	Ichneumon	Ichneumon pseudocaloscelis	Heinrich, 1949
Arthropoda	Insecta	Hymenoptera	Ichneumonidae	Ichneumoninae	Ichneumonini	Ichneumon	Ichneumon pulvinatus	Kriechbaumer, 1874
Arthropoda	Insecta	Hymenoptera	Ichneumonidae	Ichneumoninae	Ichneumonini	Ichneumon	Ichneumon pygolissus	Heinrich, 1951
Arthropoda	Insecta	Hymenoptera	Ichneumonidae	Ichneumoninae	Ichneumonini	Ichneumon	Ichneumon quadrialbatus	Gravenhorst, 1820
Arthropoda	Insecta	Hymenoptera	Ichneumonidae	Ichneumoninae	Ichneumonini	Ichneumon	Ichneumon quadriannellatus	Thomson, 1893
Arthropoda	Insecta	Hymenoptera	Ichneumonidae	Ichneumoninae	Ichneumonini	Ichneumon	Ichneumon quaesitorius	Linnaeus, 1761
Arthropoda	Insecta	Hymenoptera	Ichneumonidae	Ichneumoninae	Ichneumonini	Ichneumon	Ichneumon rogenhoferops	Heinrich, 1980
Arthropoda	Insecta	Hymenoptera	Ichneumonidae	Ichneumoninae	Ichneumonini	Ichneumon	Ichneumon rufigena	Kriechbaumer, 1875
Arthropoda	Insecta	Hymenoptera	Ichneumonidae	Ichneumoninae	Ichneumonini	Ichneumon	Ichneumon ruttneri	Heinrich, 1944
Arthropoda	Insecta	Hymenoptera	Ichneumonidae	Ichneumoninae	Ichneumonini	Ichneumon	Ichneumon sarcitorius	Linnaeus, 1758
Arthropoda	Insecta	Hymenoptera	Ichneumonidae	Ichneumoninae	Ichneumonini	Ichneumon	Ichneumon sculpturatus	Holmgren, 1864
Arthropoda	Insecta	Hymenoptera	Ichneumonidae	Ichneumoninae	Ichneumonini	Ichneumon	Ichneumon sexcinctus	Gravenhorst, 1829
Arthropoda	Insecta	Hymenoptera	Ichneumonidae	Ichneumoninae	Ichneumonini	Ichneumon	Ichneumon silaceus	Gravenhorst, 1829
Arthropoda	Insecta	Hymenoptera	Ichneumonidae	Ichneumoninae	Ichneumonini	Ichneumon	Ichneumon simulans	Tischbein, 1873
Arthropoda	Insecta	Hymenoptera	Ichneumonidae	Ichneumoninae	Ichneumonini	Ichneumon	Ichneumon spurius	Wesmael, 1848
Arthropoda	Insecta	Hymenoptera	Ichneumonidae	Ichneumoninae	Ichneumonini	Ichneumon	Ichneumon stenocerus	Thomson, 1887
Arthropoda	Insecta	Hymenoptera	Ichneumonidae	Ichneumoninae	Ichneumonini	Ichneumon	Ichneumon stigmatorius	Zetterstedt, 1838
Arthropoda	Insecta	Hymenoptera	Ichneumonidae	Ichneumoninae	Ichneumonini	Ichneumon	Ichneumon stramentarius	Gravenhorst, 1820
Arthropoda	Insecta	Hymenoptera	Ichneumonidae	Ichneumoninae	Ichneumonini	Ichneumon	Ichneumon stramentor	Rasnitsyn, 1981
Arthropoda	Insecta	Hymenoptera	Ichneumonidae	Ichneumoninae	Ichneumonini	Ichneumon	Ichneumon submarginatus	Gravenhorst, 1829
Arthropoda	Insecta	Hymenoptera	Ichneumonidae	Ichneumoninae	Ichneumonini	Ichneumon	Ichneumon sulcatoriops	Hilpert, 1992
Arthropoda	Insecta	Hymenoptera	Ichneumonidae	Ichneumoninae	Ichneumonini	Ichneumon	Ichneumon suspiciosus	Wesmael, 1845
Arthropoda	Insecta	Hymenoptera	Ichneumonidae	Ichneumoninae	Ichneumonini	Ichneumon	Ichneumon suturalis	Holmgren, 1864
Arthropoda	Insecta	Hymenoptera	Ichneumonidae	Ichneumoninae	Ichneumonini	Ichneumon	Ichneumon terminatorius	Gravenhorst, 1820
Arthropoda	Insecta	Hymenoptera	Ichneumonidae	Ichneumoninae	Ichneumonini	Ichneumon	Ichneumon thomsoni	Holmgren, 1864
Arthropoda	Insecta	Hymenoptera	Ichneumonidae	Ichneumoninae	Ichneumonini	Ichneumon	Ichneumon tuberculipes	Wesmael, 1848
Arthropoda	Insecta	Hymenoptera	Ichneumonidae	Ichneumoninae	Ichneumonini	Ichneumon	Ichneumon vafer	Tischbein, 1876
Arthropoda	Insecta	Hymenoptera	Ichneumonidae	Ichneumoninae	Ichneumonini	Ichneumon	Ichneumon validicornis	Holmgren, 1864
Arthropoda	Insecta	Hymenoptera	Ichneumonidae	Ichneumoninae	Ichneumonini	Ichneumon	Ichneumon vorax	Geoffroy, 1785
Arthropoda	Insecta	Hymenoptera	Ichneumonidae	Ichneumoninae	Ichneumonini	Ichneumon	Ichneumon vulneratorius	Zetterstedt, 1838
Arthropoda	Insecta	Hymenoptera	Ichneumonidae	Ichneumoninae	Ichneumonini	Ichneumon	Ichneumon xanthorius	Forster, 1771
Arthropoda	Insecta	Hymenoptera	Ichneumonidae	Ichneumoninae	Ichneumonini	Limerodes	Limerodes arctiventris	(Schiødte, 1839)
Arthropoda	Insecta	Hymenoptera	Ichneumonidae	Ichneumoninae	Ichneumonini	Limerodops	Limerodops elongatus	(Brischke, 1865)
Arthropoda	Insecta	Hymenoptera	Ichneumonidae	Ichneumoninae	Ichneumonini	Limerodops	Limerodops subsericans	(Gravenhorst, 1820)
Arthropoda	Insecta	Hymenoptera	Ichneumonidae	Ichneumoninae	Ichneumonini	Limerodops	Limerodops unilineatus	(Gravenhorst, 1829)
Arthropoda	Insecta	Hymenoptera	Ichneumonidae	Ichneumoninae	Ichneumonini	Melanichneumon	Melanichneumon albipictus	(Gravenhorst, 1820)
Arthropoda	Insecta	Hymenoptera	Ichneumonidae	Ichneumoninae	Ichneumonini	Melanichneumon	Melanichneumon designatorius	(Linnaeus, 1758)
Arthropoda	Insecta	Hymenoptera	Ichneumonidae	Ichneumoninae	Ichneumonini	Melanichneumon	Melanichneumon leucocheilus	(Wesmael, 1845)
Arthropoda	Insecta	Hymenoptera	Ichneumonidae	Ichneumoninae	Ichneumonini	Melanichneumon	Melanichneumon melanarius	(Wesmael, 1845)
Arthropoda	Insecta	Hymenoptera	Ichneumonidae	Ichneumoninae	Ichneumonini	Melanichneumon	Melanichneumon spectabilis	(Holmgren, 1864)
Arthropoda	Insecta	Hymenoptera	Ichneumonidae	Ichneumoninae	Ichneumonini	Neischnus	Neischnus germari	(Ratzeburg, 1849)
Arthropoda	Insecta	Hymenoptera	Ichneumonidae	Ichneumoninae	Ichneumonini	Obtusodonta	Obtusodonta equitatoria	(Panzer, 1786)
Arthropoda	Insecta	Hymenoptera	Ichneumonidae	Ichneumoninae	Ichneumonini	Orgichneumon	Orgichneumon calcatorius	(Thunberg, 1824)
Arthropoda	Insecta	Hymenoptera	Ichneumonidae	Ichneumoninae	Ichneumonini	Paracoelichneumon	Paracoelichneumon rubens	(Fonscolombe, 1847)
Arthropoda	Insecta	Hymenoptera	Ichneumonidae	Ichneumoninae	Ichneumonini	Patrocloides	Patrocloides ceaurei	(Heinrich, 1949)
Arthropoda	Insecta	Hymenoptera	Ichneumonidae	Ichneumoninae	Ichneumonini	Patrocloides	Patrocloides diasemae	(Tischbein, 1877)
Arthropoda	Insecta	Hymenoptera	Ichneumonidae	Ichneumoninae	Ichneumonini	Patrocloides	Patrocloides dubitatorius	(Sulzer, 1776)
Arthropoda	Insecta	Hymenoptera	Ichneumonidae	Ichneumoninae	Ichneumonini	Patrocloides	Patrocloides sputator	(Fabricius, 1793)
Arthropoda	Insecta	Hymenoptera	Ichneumonidae	Ichneumoninae	Ichneumonini	Platylabops	Platylabops apricus	(Gravenhorst, 1820)
Arthropoda	Insecta	Hymenoptera	Ichneumonidae	Ichneumoninae	Ichneumonini	Platylabops	Platylabops cornicula	(Wesmael, 1855)
Arthropoda	Insecta	Hymenoptera	Ichneumonidae	Ichneumoninae	Ichneumonini	Platylabops	Platylabops haematomerus	(Holmgren, 1878)
Arthropoda	Insecta	Hymenoptera	Ichneumonidae	Ichneumoninae	Ichneumonini	Platylabops	Platylabops humilis	(Wesmael, 1857)
Arthropoda	Insecta	Hymenoptera	Ichneumonidae	Ichneumoninae	Ichneumonini	Platylabops	Platylabops lariciatae	(Kriechbaumer, 1890)
Arthropoda	Insecta	Hymenoptera	Ichneumonidae	Ichneumoninae	Ichneumonini	Platylabops	Platylabops mimus	(Berthoumieu, 1899)
Arthropoda	Insecta	Hymenoptera	Ichneumonidae	Ichneumoninae	Ichneumonini	Platylabops	Platylabops speciosus	(Wesmael, 1845)
Arthropoda	Insecta	Hymenoptera	Ichneumonidae	Ichneumoninae	Ichneumonini	Platylabops	Platylabops virginalis	(Wesmael, 1845)
Arthropoda	Insecta	Hymenoptera	Ichneumonidae	Ichneumoninae	Ichneumonini	Probolus	Probolus concinnus	Wesmael, 1853
Arthropoda	Insecta	Hymenoptera	Ichneumonidae	Ichneumoninae	Ichneumonini	Probolus	Probolus crassulus	Horstmann, 2000
Arthropoda	Insecta	Hymenoptera	Ichneumonidae	Ichneumoninae	Ichneumonini	Probolus	Probolus culpatorius	(Linnaeus, 1758)
Arthropoda	Insecta	Hymenoptera	Ichneumonidae	Ichneumoninae	Ichneumonini	Pseudoamblyteles	Pseudoamblyteles homocerus	(Wesmael, 1854)
Arthropoda	Insecta	Hymenoptera	Ichneumonidae	Ichneumoninae	Ichneumonini	Rhadinodonta	Rhadinodonta flaviger	(Wesmael, 1845)
Arthropoda	Insecta	Hymenoptera	Ichneumonidae	Ichneumoninae	Ichneumonini	Rhadinodonta	Rhadinodonta rufidens	(Wesmael, 1845)
Arthropoda	Insecta	Hymenoptera	Ichneumonidae	Ichneumoninae	Ichneumonini	Rhysaspis	Rhysaspis rugosus	Tischbein, 1874
Arthropoda	Insecta	Hymenoptera	Ichneumonidae	Ichneumoninae	Ichneumonini	Rictichneumon	Rictichneumon pachymerus	(Hartig, 1838)
Arthropoda	Insecta	Hymenoptera	Ichneumonidae	Ichneumoninae	Ichneumonini	Rubicundiella	Rubicundiella externa	(Berthoumieu, 1895)
Arthropoda	Insecta	Hymenoptera	Ichneumonidae	Ichneumoninae	Ichneumonini	Rubicundiella	Rubicundiella walli	Riedel, 2020
Arthropoda	Insecta	Hymenoptera	Ichneumonidae	Ichneumoninae	Ichneumonini	Spilichneumon	Spilichneumon ammonius	(Gravenhorst, 1820)
Arthropoda	Insecta	Hymenoptera	Ichneumonidae	Ichneumoninae	Ichneumonini	Spilichneumon	Spilichneumon celenae	Perkins, 1953
Arthropoda	Insecta	Hymenoptera	Ichneumonidae	Ichneumoninae	Ichneumonini	Spilichneumon	Spilichneumon celsiae	(Tischbein, 1878)
Arthropoda	Insecta	Hymenoptera	Ichneumonidae	Ichneumoninae	Ichneumonini	Spilichneumon	Spilichneumon johansoni	(Holmgren, 1871)
Arthropoda	Insecta	Hymenoptera	Ichneumonidae	Ichneumoninae	Ichneumonini	Spilichneumon	Spilichneumon limnophilus	(Thomson, 1888)
Arthropoda	Insecta	Hymenoptera	Ichneumonidae	Ichneumoninae	Ichneumonini	Spilichneumon	Spilichneumon nigrifrons	(Holmgren, 1878)
Arthropoda	Insecta	Hymenoptera	Ichneumonidae	Ichneumoninae	Ichneumonini	Spilichneumon	Spilichneumon occisorius	(Fabricius, 1793)
Arthropoda	Insecta	Hymenoptera	Ichneumonidae	Ichneumoninae	Ichneumonini	Spilothyrateles	Spilothyrateles illuminatorius	(Gravenhorst, 1820)
Arthropoda	Insecta	Hymenoptera	Ichneumonidae	Ichneumoninae	Ichneumonini	Spilothyrateles	Spilothyrateles nuptatorius	(Fabricius, 1793)
Arthropoda	Insecta	Hymenoptera	Ichneumonidae	Ichneumoninae	Ichneumonini	Spilothyrateles	Spilothyrateles podolicus	(Heinrich, 1936)
Arthropoda	Insecta	Hymenoptera	Ichneumonidae	Ichneumoninae	Ichneumonini	Spilothyrateles	Spilothyrateles punctus	(Gravenhorst, 1829)
Arthropoda	Insecta	Hymenoptera	Ichneumonidae	Ichneumoninae	Ichneumonini	Stenaoplus	Stenaoplus pictus	(Gravenhorst, 1829)
Arthropoda	Insecta	Hymenoptera	Ichneumonidae	Ichneumoninae	Ichneumonini	Stenichneumon	Stenichneumon alpicola	(Kriechbaumer, 1872)
Arthropoda	Insecta	Hymenoptera	Ichneumonidae	Ichneumoninae	Ichneumonini	Stenichneumon	Stenichneumon culpator	(Schrank, 1802)
Arthropoda	Insecta	Hymenoptera	Ichneumonidae	Ichneumoninae	Ichneumonini	Stenichneumon	Stenichneumon inexspectatus	Heinrich, 1936
Arthropoda	Insecta	Hymenoptera	Ichneumonidae	Ichneumoninae	Ichneumonini	Stenichneumon	Stenichneumon militarius	(Thunberg, 1824)
Arthropoda	Insecta	Hymenoptera	Ichneumonidae	Ichneumoninae	Ichneumonini	Stenobarichneumon	Stenobarichneumon basalis	(Perkins, 1960)
Arthropoda	Insecta	Hymenoptera	Ichneumonidae	Ichneumoninae	Ichneumonini	Stenobarichneumon	Stenobarichneumon basiglyptus	(Kriechbaumer, 1890)
Arthropoda	Insecta	Hymenoptera	Ichneumonidae	Ichneumoninae	Ichneumonini	Stenobarichneumon	Stenobarichneumon citator	(Thunberg, 1824)
Arthropoda	Insecta	Hymenoptera	Ichneumonidae	Ichneumoninae	Ichneumonini	Stenobarichneumon	Stenobarichneumon protervus	(Holmgren, 1864)
Arthropoda	Insecta	Hymenoptera	Ichneumonidae	Ichneumoninae	Ichneumonini	Sycaonia	Sycaonia foersteri	(Wesmael, 1848)
Arthropoda	Insecta	Hymenoptera	Ichneumonidae	Ichneumoninae	Ichneumonini	Thyrateles	Thyrateles camelinus	(Wesmael, 1845)
Arthropoda	Insecta	Hymenoptera	Ichneumonidae	Ichneumoninae	Ichneumonini	Thyrateles	Thyrateles haereticus	(Wesmael, 1854)
Arthropoda	Insecta	Hymenoptera	Ichneumonidae	Ichneumoninae	Ichneumonini	Tricholabus	Tricholabus femoralis	(Thomson, 1894)
Arthropoda	Insecta	Hymenoptera	Ichneumonidae	Ichneumoninae	Ichneumonini	Tricholabus	Tricholabus strigatorius	(Gravenhorst, 1829)
Arthropoda	Insecta	Hymenoptera	Ichneumonidae	Ichneumoninae	Ichneumonini	Triptognathops	Triptognathops bicolor	(Kriechbaumer, 1882)
Arthropoda	Insecta	Hymenoptera	Ichneumonidae	Ichneumoninae	Ichneumonini	Triptognathus	Triptognathus atripes	(Gravenhorst, 1820)
Arthropoda	Insecta	Hymenoptera	Ichneumonidae	Ichneumoninae	Ichneumonini	Triptognathus	Triptognathus fumigator	(Gravenhorst, 1820)
Arthropoda	Insecta	Hymenoptera	Ichneumonidae	Ichneumoninae	Ichneumonini	Triptognathus	Triptognathus fumipennis	(Rudow, 1888)
Arthropoda	Insecta	Hymenoptera	Ichneumonidae	Ichneumoninae	Ichneumonini	Triptognathus	Triptognathus subalpinus	Heinrich, 1949
Arthropoda	Insecta	Hymenoptera	Ichneumonidae	Ichneumoninae	Ichneumonini	Ulesta	Ulesta perspicua	(Wesmael, 1857)
Arthropoda	Insecta	Hymenoptera	Ichneumonidae	Ichneumoninae	Ichneumonini	Virgichneumon	Virgichneumon albilineatus	(Gravenhorst, 1820)
Arthropoda	Insecta	Hymenoptera	Ichneumonidae	Ichneumoninae	Ichneumonini	Virgichneumon	Virgichneumon albosignatus	(Gravenhorst, 1829)
Arthropoda	Insecta	Hymenoptera	Ichneumonidae	Ichneumoninae	Ichneumonini	Virgichneumon	Virgichneumon callicerus	(Gravenhorst, 1820)
Arthropoda	Insecta	Hymenoptera	Ichneumonidae	Ichneumoninae	Ichneumonini	Virgichneumon	Virgichneumon digrammus	(Gravenhorst, 1820)
Arthropoda	Insecta	Hymenoptera	Ichneumonidae	Ichneumoninae	Ichneumonini	Virgichneumon	Virgichneumon dumeticola	(Gravenhorst, 1829)
Arthropoda	Insecta	Hymenoptera	Ichneumonidae	Ichneumoninae	Ichneumonini	Virgichneumon	Virgichneumon extremator	(Thunberg, 1824)
Arthropoda	Insecta	Hymenoptera	Ichneumonidae	Ichneumoninae	Ichneumonini	Virgichneumon	Virgichneumon faunus	(Gravenhorst, 1829)
Arthropoda	Insecta	Hymenoptera	Ichneumonidae	Ichneumoninae	Ichneumonini	Virgichneumon	Virgichneumon maculicauda	(Perkins, 1953)
Arthropoda	Insecta	Hymenoptera	Ichneumonidae	Ichneumoninae	Ichneumonini	Virgichneumon	Virgichneumon monostagon	(Gravenhorst, 1820)
Arthropoda	Insecta	Hymenoptera	Ichneumonidae	Ichneumoninae	Ichneumonini	Virgichneumon	Virgichneumon perversus	(Kriechbaumer, 1893)
Arthropoda	Insecta	Hymenoptera	Ichneumonidae	Ichneumoninae	Ichneumonini	Virgichneumon	Virgichneumon tenuipes	(Berthoumieu, 1896)
Arthropoda	Insecta	Hymenoptera	Ichneumonidae	Ichneumoninae	Ichneumonini	Virgichneumon	Virgichneumon tergenus	(Gravenhorst, 1820)
Arthropoda	Insecta	Hymenoptera	Ichneumonidae	Ichneumoninae	Ichneumonini	Vulgichneumon	Vulgichneumon bimaculatus	(Schrank, 1776)
Arthropoda	Insecta	Hymenoptera	Ichneumonidae	Ichneumoninae	Ichneumonini	Vulgichneumon	Vulgichneumon deceptor	(Scopoli, 1763)
Arthropoda	Insecta	Hymenoptera	Ichneumonidae	Ichneumoninae	Ichneumonini	Vulgichneumon	Vulgichneumon saturatorius	(Linnaeus, 1758)
Arthropoda	Insecta	Hymenoptera	Ichneumonidae	Ichneumoninae	Ichneumonini	Vulgichneumon	Vulgichneumon suavis	(Gravenhorst, 1820)
Arthropoda	Insecta	Hymenoptera	Ichneumonidae	Ichneumoninae	Ichneumonini	Vulgichneumon	Vulgichneumon trifarius	(Berthoumieu, 1892)
Arthropoda	Insecta	Hymenoptera	Ichneumonidae	Ichneumoninae	Ichneumonini	Zanthojoppa	Zanthojoppa lutea	(Gravenhorst, 1829)
Arthropoda	Insecta	Hymenoptera	Ichneumonidae	Ichneumoninae	Joppocryptini	Pseudoplatylabus	Pseudoplatylabus uniguttatus	(Gravenhorst, 1829)
Arthropoda	Insecta	Hymenoptera	Ichneumonidae	Ichneumoninae	Joppocryptini	Pseudoplatylabus	Pseudoplatylabus violentus	(Gravenhorst, 1829)
Arthropoda	Insecta	Hymenoptera	Ichneumonidae	Ichneumoninae	Listrodromini	Anisobas	Anisobas brombacheri	Heinrich, 1933
Arthropoda	Insecta	Hymenoptera	Ichneumonidae	Ichneumoninae	Listrodromini	Anisobas	Anisobas cingulatellus	Horstmann, 1997
Arthropoda	Insecta	Hymenoptera	Ichneumonidae	Ichneumoninae	Listrodromini	Anisobas	Anisobas hostilis	(Gravenhorst, 1820)
Arthropoda	Insecta	Hymenoptera	Ichneumonidae	Ichneumoninae	Listrodromini	Anisobas	Anisobas platystylus	Thomson, 1888
Arthropoda	Insecta	Hymenoptera	Ichneumonidae	Ichneumoninae	Listrodromini	Anisobas	Anisobas rebellis	Wesmael, 1845
Arthropoda	Insecta	Hymenoptera	Ichneumonidae	Ichneumoninae	Listrodromini	Listrodromus	Listrodromus nycthemerus	(Gravenhorst, 1820)
Arthropoda	Insecta	Hymenoptera	Ichneumonidae	Ichneumoninae	Listrodromini	Neotypus	Neotypus coreensis	Uchida, 1930
Arthropoda	Insecta	Hymenoptera	Ichneumonidae	Ichneumoninae	Listrodromini	Neotypus	Neotypus melanocephalus	(Gmelin, 1790)
Arthropoda	Insecta	Hymenoptera	Ichneumonidae	Ichneumoninae	Listrodromini	Neotypus	Neotypus nobilitator	(Gravenhorst, 1807)
Arthropoda	Insecta	Hymenoptera	Ichneumonidae	Ichneumoninae	Oedicephalini	Notosemus	Notosemus bohemani	(Wesmael, 1855)
Arthropoda	Insecta	Hymenoptera	Ichneumonidae	Ichneumoninae	Phaeogenini	Aethecerus	Aethecerus discolor	Wesmael, 1845
Arthropoda	Insecta	Hymenoptera	Ichneumonidae	Ichneumoninae	Phaeogenini	Aethecerus	Aethecerus dispar	Wesmael, 1845
Arthropoda	Insecta	Hymenoptera	Ichneumonidae	Ichneumoninae	Phaeogenini	Aethecerus	Aethecerus foveolatus	Gregor, 1940
Arthropoda	Insecta	Hymenoptera	Ichneumonidae	Ichneumoninae	Phaeogenini	Aethecerus	Aethecerus graniger	Thomson, 1891
Arthropoda	Insecta	Hymenoptera	Ichneumonidae	Ichneumoninae	Phaeogenini	Aethecerus	Aethecerus longulus	Wesmael, 1845
Arthropoda	Insecta	Hymenoptera	Ichneumonidae	Ichneumoninae	Phaeogenini	Aethecerus	Aethecerus nitidus	Wesmael, 1845
Arthropoda	Insecta	Hymenoptera	Ichneumonidae	Ichneumoninae	Phaeogenini	Aethecerus	Aethecerus pallicoxa	Thomson, 1891
Arthropoda	Insecta	Hymenoptera	Ichneumonidae	Ichneumoninae	Phaeogenini	Aethecerus	Aethecerus placidus	Wesmael, 1845
Arthropoda	Insecta	Hymenoptera	Ichneumonidae	Ichneumoninae	Phaeogenini	Aethecerus	Aethecerus porcellus	Holmgren, 1890
Arthropoda	Insecta	Hymenoptera	Ichneumonidae	Ichneumoninae	Phaeogenini	Aethecerus	Aethecerus rugifrons	Holmgren, 1890
Arthropoda	Insecta	Hymenoptera	Ichneumonidae	Ichneumoninae	Phaeogenini	Aethecerus	Aethecerus subuliferus	(Holmgren, 1890)
Arthropoda	Insecta	Hymenoptera	Ichneumonidae	Ichneumoninae	Phaeogenini	Baeosemus	Baeosemus mitigosus	(Gravenhorst, 1829)
Arthropoda	Insecta	Hymenoptera	Ichneumonidae	Ichneumoninae	Phaeogenini	Baeosemus	Baeosemus oenescens	Thomson, 1891
Arthropoda	Insecta	Hymenoptera	Ichneumonidae	Ichneumoninae	Phaeogenini	Centeterus	Centeterus confector	(Gravenhorst, 1829)
Arthropoda	Insecta	Hymenoptera	Ichneumonidae	Ichneumoninae	Phaeogenini	Centeterus	Centeterus major	Wesmael, 1845
Arthropoda	Insecta	Hymenoptera	Ichneumonidae	Ichneumoninae	Phaeogenini	Centeterus	Centeterus rubiginosus	(Gmelin, 1790)
Arthropoda	Insecta	Hymenoptera	Ichneumonidae	Ichneumoninae	Phaeogenini	Colpognathus	Colpognathus celerator	(Gravenhorst, 1807)
Arthropoda	Insecta	Hymenoptera	Ichneumonidae	Ichneumoninae	Phaeogenini	Colpognathus	Colpognathus divisus	Thomson, 1891
Arthropoda	Insecta	Hymenoptera	Ichneumonidae	Ichneumoninae	Phaeogenini	Diadromus	Diadromus arrisor	Wesmael, 1845
Arthropoda	Insecta	Hymenoptera	Ichneumonidae	Ichneumoninae	Phaeogenini	Diadromus	Diadromus candidatus	(Gravenhorst, 1829)
Arthropoda	Insecta	Hymenoptera	Ichneumonidae	Ichneumoninae	Phaeogenini	Diadromus	Diadromus collaris	(Gravenhorst, 1829)
Arthropoda	Insecta	Hymenoptera	Ichneumonidae	Ichneumoninae	Phaeogenini	Diadromus	Diadromus heteroneurus	Holmgren, 1890
Arthropoda	Insecta	Hymenoptera	Ichneumonidae	Ichneumoninae	Phaeogenini	Diadromus	Diadromus intermedius	Wesmael, 1845
Arthropoda	Insecta	Hymenoptera	Ichneumonidae	Ichneumoninae	Phaeogenini	Diadromus	Diadromus pulchellus	Wesmael, 1845
[truncated: 1,645 more rows]
